# Supplementary material for: Mislabeled and ambiguous market names in invertebrate and finfish seafood conceal species of conservation concern in Calgary, Alberta, Canada
Source: PeerJ. 2024 Sep 23;12:e18113. doi: 10.7717/peerj.18113 (PMC11426316; doi:10.7717/peerj.18113)
Supplement: Supplemental Information 1 [file peerj-12-18113-s001.xlsx]

## Sheet: invertebrates
BOLD ID	Collected By	Collection Date	Year	Vendor	Vendor Type	Market Name	Price	DNA Barcode	Barcode Identity (as of 2024)	Mislabeling Type
MOBIL10823-20	University of Calgary	Jan 28 2020	2020	Walmart, Calgary	Grocery	Shrimp head-on shell-on	4.88	GAGCTGGAATAGTAGGTACCGCTCTTAGACTTATTATCCGAGCTGAATTAGGTCAACCTGGGAGCCTCATTGGGGATGATCAAATTTATAACGTAGTTGTCACAGCTCACGCTTTTGTAATAATTTTTTTTATAGTTATACCAATTATAATTGGAGGATTTGGTAATTGACTAGTACCTTTAATGTTAGGTGCCCCAGATATAGCCTTCCCTCGAATGAATAATATAAGCTTCTGGTTATTACCTCCTTCTCTTACATTGCTTTTATCAAGAGGAATGGTTGAAAGAGGTGTCGGAACCGGATGAACGGTATACCCTCCTTTATCTGCCAGTATTGCTCACGCTGGAGCTTCAGTAGATCTTGGAATTTTCTCTCTTCACTTAGCTGGAGTATCTTCTA…	Penaeus vannamei (100%), Litopenaeus vannamei (100%) (synonym)	Not mislabeled
MOBIL10824-20	University of Calgary	Jan 28 2020	2020	walmart Calgary	Grocery	Pacific white shrimp raw	9.97	GAGCTGGAATAGTAGGTACCGCTCTTAGACTTATTATCCGAGCTGAATTAGGTCAACCTGGGAGCCTCATTGGGGATGATCAAATTTATAACGTAGTTGTCACAGCTCACGCTTTTGTAATAATTTTTTTTATAGTTATACCAATTATAATTGGAGGATTTGGTAATTGACTAGTACCTTTAATGTTAGGTGCCCCAGATATAGCCTTCCCTCGGATGAATAATATAAGCTTCTGGTTATTACCTCCTTCTCTCACATTGCTTTTATCAAGAGGAATGGTTGAAAGAGGTGTCGGAACCGGATGAACGGTATACCCTCCTTTATCTGCCAGTATTGCTCACGCTGGAGCTTCAGTAGATCTTGGAATTTTCTCTCTTCACTTAGCTGGAGTATCTTCTA…	Penaeus vannamei (100%), Litopenaeus vannamei (100%) (synonym)	Not mislabeled
MOBIL10825-20	University of Calgary	Jan 28 2020	2020	Walmart, Calgary	Grocery	Cocktail shrimp wild	3.97	ATAGTTATACCAATTATAATTGGAGGATTTGGTAATTGACTAGTACCTTTAATGTTAGGTGCCCCAGATATAGCCTTCCCTCGGATGAATAATATAAGCTTCTGGTTATTACCTCCTTNTCTCACATTGCTTTTATCAAGAGGAATGGTTGAAAGAGGTGTCGGAACCGGATGAACGGTATACCCTCCTTTATCTGCCAGTATTGCTCACGCTGGAGCTTCAGTAGATCTTGGAATTTTCTCTCTTCACTTAGCTGGAGTATCTTCTATTCTGGGAGCAGTAAACTTTATAACAACTGTAATCAATATACGATCTACAGGAATAACTATAGACCGTATACCTCTATTTGTATGAGCAGTATTTATCACTGCTTTATTACTACTTTTATCATTA	Penaeus vannamei (100%), Litopenaeus vannamei (100%) (synonym)	Not mislabeled
MOBIL10826-20	University of Calgary	Jan 28 2020	2020	Walmart, Calgary	Grocery	Pacific white shrimp cooked	9.97	GAGCTGGAATAGTAGGTACCGCTCTTAGACTTATTATCCGAGCTGAATTAGGTCAACCTGGGAGCCTCATTGGGGATGATCAAATTTATAACGTAGTTGTCACAGCTCACGCTTTTGTAATAATTTTTTTTATAGTTATACCAATTATAATTGGAGGATTTGGTAATTGACTAGTACCTTTAATGTTAGGTGCCCCAGATATAGCCTTCCCTCGAATGAATAATATAAGCTTCTGGTTATTACCTCCTTCTCTTACATTGCTTTTATCAAGAGGAATGGTTGAAAGAGGTGTCGGAACCGGATGAACGGTATACCCTCCTTTATCTGCCAGTATTGCTCACGCTGGAGCTTCAGTAGATCTTGGAATTTTCTCTCTTCACTTAGCTGGAGTATCTTCTA…	Penaeus vannamei (100%), Litopenaeus vannamei (100%) (synonym)	Not mislabeled
MOBIL10854-20	University of Calgary	Feb 2 2020	2020	Safeway, Calgary	Grocery	Shrimp platter with sauce		GAGCTGGAATAGTAGGTACCGCTCTTAGACTTATTATCCGAGCTGAATTAGGTCAACCTGGGAGCCTCATTGGGGATGATCAAATTTATAATGTAGTTGTCACAGCTCACGCTTTTGTAATAATTTTTTTTATAGTTATACCAATTATAATTGGAGGATTTGGTAATTGACTAGTACCTTTAATGTTAGGTGCCCCAGATATAGCCTTCCCTCGAATGAATAATATAAGCTTCTGGTTATTACCTCCTTCTCTTACATTGCTTTTATCAAGAGGAATGGTTGAAAGAGGTGTCGGAACCGGATGAACGGTATACCCTCCTTTATCTGCCAGTATTGCTCACGCTGGAGCTTCAGTAGATCTTGGAATTTTCTCTCTTCACTTAGCTGGAGTATCTTCTA…	Penaeus vannamei (100%), Litopenaeus vannamei (99.82%) (synonym)	Not mislabeled
MOBIL10872-20	University of Calgary	Jan 28 2020	2020	T & T, Calgary	Grocery	seafood medley	9.99	GAGACTGGTTTTTTAATGTAGTGGTTACAACACATGCTTTAGTGATGATTTTTTTTGCTGTAATACCAATCTTAATCGGGGCTTTTGGCAATTGGCTTATCCCTTTACTGGTAGGAGGTAAGGATATAATTTACCCTCGGATAAATAATTTGAGATATTGACTGTCTCCAAACGCATTGTACTTACTCATACTATCTTTTAGGACAGATAAAGGGGTGGGCGCTGGATGGACTGTATACCCCCCATTGTCTAGATACCCCTATCATAGAGGGCCAAGAATAGACGTTCTTATTGTGGCGCTTCATTTAGCTGGAGTTAGATCCTTAGTAGGAGCTATTAATTTTGCCAGGACTAACAAAAACATACCAGCTTTGGAGATAAAAGGGGAGCGAGCTGAGC…	Mytilus galloprovincialis (99.47%)	Not mislabeled
MOBIL10873-20	University of Calgary	Jan 28 2020	2020	T & T, Calgary	Grocery	seafood medley, squid	9.99	AACATTATATTTCATTTTTGGAATTTGAGCAGGATTAGTTGGTACTTCATTAAGACTAATAATCCGAACAGAATTGGGGAAACCTGGTTCACTACTCAATGACGATCAATTATATAACGTAGTAGTAACTGCTCATGGCTTCATTATAATTTTTTTCATAGTTATACCTATTATAATTGGGGGTTTTGGTAATTGATTAGTACCTTTAATACTAGGAGCCCCAGACATAGCTTTTCCACGTATAAATAATATAAGATTTTGACTACTTCCACCATCTCTGACATTATTATTAGCCTCATCAGCAGTCGAAAGAGGGGCTGGTACTGGATGGACAGTTTATCCTCCTTTATCTAGAAACTTATCTCACGCTGGACCCTCAGTAGATTTAGCTATTTTTTC…	Uroteuthis duvauceli	Not mislabeled
MOBIL10874-20	University of Calgary	Jan 28 2020	2020	T & T, Calgary	Grocery	seafood medley, mussel	9.99	GAGATTGGTTTTATAATGTGGTTGTTACAACACACGCCTTAATAATAATTTTCTTTGCTGTAATACCCATTCTAATCGGAGCTTTCGGTAATTGGCTGATTCCTCTATTAGTAGGTGGTAAAGATATAATTTATCCGCGGATAAATAATTTGAGCTATTGGTTATCTCCTAATGCGCTATACTTACTTATATTATCTTTTAGAACGGATAAAGGGGTAGGTGCTGGATGGACTATTTACCCGCCATTGTCTGTATATCCTTATCATAGCGGGCCGAGGATAGATGTTCTTATTGTGTCCTTGCATTTAGCTGGGTTAAGTTCTTTGGTGGGTGCTATTAATTTTGCTAGTACCAACAAAAACATACCAGTTTTAGAGATAAAAGGAGAACGAGCTGAGC…	Mytilus galloprovincialis (99.72%), Mytilus sp. AUSF2 (98.99%)), Mytilus sp. 2 SR-2017 (98.99%), Mytilus sp. CU8 (98.99%), Mytilus sp. PU8 (98.99%), Mytilus sp. CHLF3 (98.99%), Mytilus trossulus (98.99%), Mytilus sp. CHGF2 (98.99%), Mytilus sp. WHBF2 (98.99%), Mytilus sp. AUSF1 (98.99%), Mytilus edulis (98.79%), Mytilus sp. 11LL (98.79%), Mytilus chilensis (98.59%), Mytilus sp. CHGF5 (98.59%)	Not mislabeled
MOBIL10875-20	University of Calgary	Jan 28 2020	2020	T & T, Calgary	Grocery	seafood medley, octopus	9.99	TATATAACGTGGTGGTCACTGCACACGGTTTCATTATAATTTTCTTCTTAGTTATACCTATTATAATTGGAGGATTTGGTAACTGACTAGTTCCCTTAATATTAGGAGCCCCAGATATAGCTTTTCCACGTATAAACAACATGAGATTTTGGCTTCTTCCTCCTTCTCTAACCCTTNTACTAGCTTCTTCCGCTGTAGAAAGAGGAGCAGGAACAGGCTGAACTGTCTACCCTCCTTTATCTAGTAACTTATCCCATGCAGGCCCTTCAGTTGATTTAGCTATTTTCTCCTTACATCTGGCTGGTGTTTCCTCTATTTTGGGAGCAATTAACTTTATTACCACTATTTTAAATATACGATGAGAAGGTCTCCAAATAGAACGACTACCCTTGTTTGCAT…	Dosidicus environmental sample, D. sp. USNM IZ 1411890, Dosidicus gigas	Product substitution
MOBIL10876-20	University of Calgary	Jan 25 2020	2020	Superstore, Calgary	Grocery	raw shrimp club pack previously frozen	6.78	ATTATACTTTATCTTCGGGGCTTGAGCTGGAATAGTAGGTACCGCTCTTAGACTTATTATCCGAGCTGAATTAGGTCAACCTGGGAGCCTCATCGGGGATGATCAAATTTATAACGTAGTTGTCACAGCTCACGCTTTTGTAATAATTTTTTTTATAGTTATACCAATTATAATTGGAGGATTTGGTAATTGACTAGTACCTTTAATGTTAGGTGCCCCAGATATAGCCTTCCCTCGAATGAATAATATAAGCTTCTGGTTATTACCTCCTTCTCTTACATTGCTTTTATCAAGAGGAATGGTTGAAAGAGGTGTCGGAACCGGATGAACGGTATACCCTCCTTTATCTGCCAGTATTGCTCACGCTGGAGCTTCAGTAGATCTTGGAATTTTCTCTCT…	Penaeus vannamei (100%), Litopenaeus vannamei (99.81%) (synonym)	Not mislabeled
MOBIL10878-20	University of Calgary	Jan 25 2020	2020	Superstore, Calgary	Grocery	Live lobster	20.38	TACCCTATATTTTATCTTCGGAGCATGAGCAGGCATAGTAGGGACTTCATTAAGACTGGTAATTCGTGCTGAATTAGGTCAACCAGGAAGCCTCATTGGTGACGATCAAATCTACAATGTAGTTGTAACCGCCCACGCTTTTGTTATAATTTTCTTCATAGTTATACCCATTATAATTGGAGGCTTTGGAAACTGACTTGTACCACTTATACTAGGAGCTCCAGATATAGCATTTCCCCGTATGAACAATATAAGATTTTGACTTCTTCCTTTTTCTTTAACATTATTATTAACAAGAGGAATAGTAGAAAGTGGAGTAGGAACTGGATGAACTGTCTACCCTCCACTCTCAGCGGCAATTGCTCACGCAGGTGCTTCCGTTGACTTAGGAATTTTCTC…	Homarus americanus	Not mislabeled
MOBIL10880-20	University of Calgary	Jan 27 2020	2020	Safeway, Calgary	Grocery	Ocean Wise Malpeques In Shell	1	CAGATTTTACATAATCTTCGGATTTTGGGCAGTTTTAGCTGGGACCAGTTTTAGGTCTCTTATTCGCTGAAGTCTTTATACTCCTGGGGCTAAATTTTTAGAGCCTGTTGTGTATAACGCTGTGGTAACGAGTCACGCGTTAGTAATGATTTTCTTCTTTGTTATGCCAGTAATAATTGGTGGGTTTGGTAATTGGCTTATTCCGCTTATACTTGAAGTGGCAGACATGCAGTTCCCTCGATTAAATGCTTTTAGATTCTGAGTATTGCCAGGGTCATTGCTGCTAATATTGATGTCAAATATGTCTGAGAGAGGAGTTGGGTCAGGATGAACCATTTACCCTCCGCTGTCAACTTTTTCTTACCATGGAGTTTGCATGGATTTTGCCATTTTAAGGTT…	Crassostrea virginica	Semantic mislabeling
MOBIL10881-20	University of Calgary	Jan 27 2020	2020	Safeway, Calgary	Grocery	Wild Argentine prawns	0.72	TCTATACTTTATTTTCGGAGCATGAGCTGGAATAGTAGGGACAGCTCTCAGTTTAATTATCCGGGCTGAACTAGGTCAACCAGGAAGACTTATTGGTGATGACCAAATCTATAACGTAGTAGTAACTGCTCACGCTTTTGTAATAATTTTCTTTATGGTAATACCAATTATAATTGGAGGGTTCGGAAACTGATTAGTACCCCTTATATTAGGTGCCCCAGATATAGCTTTCCCCCGAATAAATAATATAAGATTTTGACTCTTACCTCCTTCTCTAACTCTATTACTTTCTAGAGGAATAGTAGAAAGAGGAGTAGGAACAGGATGAACTGTTTATCCTCCTTTATCCGCCGGAATTGCTCACGCCGGGGCCTCTGTAGACCTAGGTATTTTCTCACT…	Pleoticus muelleri (100%), Pleoticus robustus (99.77%)	Semantic mislabeling
MOBIL10883-20	University of Calgary	Jan 27 2020	2020	Safeway, Calgary	Grocery	Octopus flower	6.76	CACACTATACTTCATTTTTGGAATTTGATCAGGACTTTTAGGTACCTCCTTAAGTTTAATAATTCGAACAGAACTAGGACAACCAGGATCCCTCCTAAATGATGATCAATTATATAATGTAATTGTTACAGCTCACGCATTTGTTATAATTTTTTTTCTTGTTATACCAGTTATAATTGGAGGATTTGGAAACTGATTAGTTCCTTTAATACTAGGAGCACCAGATATAGCATTCCCACGAATAAATAACATAAGCTTCTGACTCTTACCTCCTTCTCTCACTCTTCTCCTTTCATCTGCAGCTGTTGAAAGTGGTGCAGGTACCGGATGAACCGTTTACCCACCTCTTTCAAGAAATTTAGCTCATATAGGACCCTCTGTTGATCTAGCAATTTTCTC…	Octopus vulgaris	Not mislabeled
MOBIL10884-20	University of Calgary	Jan 29 2020	2020	Co-op, Calgary	Grocery	Wild crab claw	15.99	TACATTATATTTTATTTTTGGAGCATGATCAGGAATAGTAGGGACTTCTCTTAGTCTTATTATTCGAGCAGAACTAGGTCAACCTGGTACTCTTATTGGTAATGACCAAATTTACAATGTTGTAGTTACAGCTCATGCTTTTGTAATAATTTTCTTTATAGTTATACCAATTATAATTGGGGGATTTGGTAACTGACTAGTACCATTAATGTTAGGAGCCCCTGACATGGCTTTTCCTCGTATAAACAACATAAGATTTTGACTTCTCCCTCCTTCTCTAACTTTACTTCTTATAAGAGGTATAGTGGAAAGAGGTGTTGGTACAGGTTGAACCGTCTATCCTCCTCTTTCAGCAGCCATCGCTCACGCAGGAGCTTCTGTAGATCTAGGTATTTTCTC…	Portunus pelagicus (100%), Portunus trituberculatus (99.83%)	Not mislabeled
MOBIL10885-20	University of Calgary	Jan 29 2020	2020	Co-op, Calgary	Grocery	Cooked shrimp cocktail with sauce	7.97	AACATTATACTTTATCTTCGGGGCTTGAGCTGGAATAGTAGGTACCGCTCTTAGACTTATTATCCGAGCTGAATTAGGTCAACCTGGGAGCCTCATTGGGGATGATCAAATTTATAACGTAGTTGTCACAGCTCACGCTTTTGTAATAATTTTTTTTATAGTTATACCAATTATAATTGGAGGATTTGGTAATTGACTAGTACCTTTAATGTTAGGTGCCCCAGATATAGCCTTCCCTCGAATGAATAATATAAGCTTCTGGTTATTACCTCCTTCTCTTACATTGCTTTTATCAAGAGGAATGGTTGAAAGAGGTGTCGGAACCGGATGAACGGTATACCCTCCTTTATCTGCCAGTATTGCTCACGCTGGAGCTTCAGTAGATCTTGGAATTTTCTC…	Penaeus vannamei (100%), Litopenaeus vannamei (100%) (synonym)	Not mislabeled
MOBIL10886-20	University of Calgary	Jan 29 2020	2020	Co-op, Calgary	Grocery	Southern king crab legs and claws	34.99	TACATTATATTTTATTTTTGGAGCTTGGGCTGGAATAGTAGGTACTTCTTTGAGTTTAATTATTCGAGCTGAACTAGGACAACCAGGTAGTTTAATTGGAGATGATCAAATTTATAATGTAGTTGTTACAGCACATGCTTTTGTAATAATTTTTTTTATAGTAATACCCATTATAATTGGGGGATTTGGAAATTGACTAGTACCATTAATATTAGGGGCTCCAGATATAGCCTTTCCACGAATAAATAACATAAGTTTTTGACTTTTACCTCCATCATTAACTCTTTTATTAACTAGGGGGATAGTAGAAAGAGGTGTAGGTACAGGATGAACTGTTTACCCCCCATTGTCTGCGGCAATCGCACATGCAGGAGCATCAGTAGATTTAGGAATTTTTTC…	Lithodes santolla (100%), Lithodes confundens (99.67%), Lithodes sp. (99.63%)	Not mislabeled
MOBIL10887-20	University of Calgary	Jan 29 2020	2020	Co-op, Calgary	Grocery	Pacific white shrimp	8.99	AACATTATACTTTATCTTCGGGGCTTGAGCTGGAATAGTAGGTACCGCTCTTAGACTTATTATCCGAGCTGAGTTAGGTCAACCTGGGAGCCTCATTGGGGATGATCAAATTTATAACGTAGTTGTCACAGCTCACGCTTTTGTAATAATTTTTTTTATAGTTATACCAATTATAATTGGAGGATTTGGTAATTGACTAGTACCTTTAATGTTAGGTGCTCCAGATATAGCCTTCCCTCGAATGAATAATATAAGCTTCTGGTTATTACCTCCTTCTCTCACATTGCTTTTATCAAGAGGAATGGTTGAAAGAGGTGTCGGAACCGGATGAACGGTATACCCTCCTTTATCTGCCAGTATTGCTCACGCTGGAGCTTCAGTAGATCTTGGAATTTTCTC…	Penaeus vannamei (100%), Litopenaeus vannamei (99.29%) (synonym)	Not mislabeled
MOBIL10888-20	University of Calgary	Jan 29 2020	2020	Superstore, Calgary	Grocery	Pacific white shrimp	8.99	AACATTATACTTTATCTTCGGGGCTTGAGCTGGAATAGTAGGTACCGCTCTTAGACTTATTATCCGAGCTGAATTAGGTCAACCTGGGAGCCTCATTGGGGATGATCAAATTTATAACGTAGTTGTCACAGCTCACGCCTTTGTAATAATTTTTTTTATAGTTATACCAATTATAATTGGAGGATTTGGTAATTGACTAGTACCTTTAATGTTAGGTGCCCCAGATATAGCCTTCCCTCGAATGAATAATATAAGCTTCTGGTTATTACCTCCTTCTCTTACATTGCTTTTATCAAGAGGAATGGTTGAAAGAGGTGTCGGAACCGGATGAACGGTATACCCTCCTTTATCTGCCAGTATTGCTCACGCTGGAGCTTCAGTAGATCTTGGAATTTTCTC…	Penaeus vannamei (100%), Litopenaeus vannamei (100%) (synonym)	Not mislabeled
MOBIL10892-20	University of Calgary	Jan 28 2020	2020	Walmart, Calgary	Grocery	Pacific white shrimp	9.97	AACATTATACTTTATCTTCGGGGCTTGAGCTGGAATAGTAGGTACCGCTCTTAGACTTATTATCCGAGCTGAATTAGGTCAACCTGGGAGCCTCATTGGGGATGATCAAATTTATAACGTAGTTGTCACAGCTCACGCTTTTGTAATAATTTTTTTTATAGTTATACCAATTATAATTGGAGGATTTGGTAATTGACTAGTACCTTTAATGTTAGGTGCCCCAGATATAGCCTTCCCTCGAATGAATAATATAAGCTTCTGGTTATTACCTCCTTCTCTTACATTGCTTTTATCAAGAGGAATGGTTGAAAGAGGTGTCGGAACCGGATGAACGGTATACCCTCCTTTATCTGCCAGTATTGCTCACGCTGGAGCTTCAGTAGATCTTGGAATTTTCTC…	Penaeus vannamei (100%), Litopenaeus vannamei (100%) (synonym)	Not mislabeled
MOBIL10893-20	University of Calgary	Jan 28 2020	2020	Walmart, Calgary	Grocery	Shrimp ring	5.25	AACATTATACTTTATCTTCGGGGCTTGAGCTGGAATAGTAGGTACCGCTCTTAGACTTATTATCCGAGCTGAATTAGGTCAACCTGGGAGCCTCATTGGGGATGATCAAATTTATAACGTAGTTGTCACAGCTCACGCCTTTGTAATAATTTTTTTTATAGTTATACCAATTATAATTGGAGGATTTGGTAATTGACTAGTACCTTTAATGTTAGGTGCCCCAGATATAGCCTTCCCTCGAATGAATAATATAAGCTTCTGGTTATTACCTCCTTCTCTTACATTGCTTTTATCAAGAGGAATGGTTGAAAGAGGTGTCGGAACCGGATGAACGGTATACCCTCCTTTATCTGCCAGTATTGCTCACGCTGGAGCTTCAGTAGATCTTGGAATTTTCTC…	Penaeus vannamei (100%), Litopenaeus vannamei (99.82%) (synonym)	Not mislabeled
MOBIL10896-20	University of Calgary	Jan 27 2020	2020	Blair's No Frills, Calgary	Grocery	California squid	9.98	AACATTATATTTTATATTCGGTATTTGAGCAGGGCTAGTAGGTACATCATTAAGATTGATAATCCGTACAGAGTTAGGGAAACCTGGCTCCTTATTAAATGATGATCAATTATACAATGTAGTAGTTACTGCACATGGTTTCATTATAATTTTTTTTATAGTTATACCTATTATAATTGGAGGATTTGGTAATTGACTAGTACCTTTAATATTAGGTGCTCCAGACATAGCCTTTCCTCGAATAAACAACATAAGATTTTGACTATTACCACCTTCACTCACTCTTCTTTTAGCATCCTCGGCTGTTGAAAGCGGAGCCGGAACAGGTTGAACAGTCTACCCACCCCTATCTAGAAATCTCTCTCATGCTGGTCCTTCAGTAGACCTCGCCATTTTCTC…	Doryteuthis opalescens (100%), Uroteuthis sibogae (100%), Uroteuthis chinensis (99.83%)	Semantic mislabeling
MOBIL10897-20	University of Calgary	Jan 29 2020	2020	Safeway, Calgary	Grocery	Ocean wise clams manilla live	$1.59/100 g	TACATTATATTTCATTTTTTCAATTTGGGCTGGTCTTATGGGGACTGCTTTTAGTGTTATTATTCGTATAGAGTTGGCTATGCCGGGGAAAATGTTAGATGATGGTCAGCTTTACAATTTAGTTGTAACTGCTCATGGATTAGTTATGATTTTTTTCTTAGTGATACCAATAATAATTGGTGGGTTTGGTAATTGGTTGATTCCATTAATATTAAAAATACCTGATATAGCATTTCCTCGAATAAATAATTTAAGTTTTTGGTTACTTCCTGTATCAATATTATTATTATTAGGGTCTGCATATGTGGATGGTGGGGCTGGTACTGGTTGAACAGTGTACCCTCCGTTGTCGTCAATTGGGTTCCATTCAGGTTGTGCTGTGGATTATGTAATTTTTTC…	Ruditapes philippinarum (100%), Venerupis philippinarum (99.83%)	Not mislabeled
MOBIL10898-20	University of Calgary	Jan 29 2020	2020	Safeway, Calgary	Grocery	Squid tubes	2.29	AACATTATATTTCATTTTTGGTATTTGAGCAGGATTAGTAGGTACTTCACTAAGGCTAATAATCCGAACAGAGTTAGGAAAACCTGGTTCACTACTTAATGATGATCAATTATATAACGTAGTAGTAACTGCTCACGGTTTTATTATAATTTTTTTTATAGTTATACCTATTATAATTGGGGGTTTTGGTAATTGATTAGTACCTTTAATACTAGGAGCCCCAGATATAGCTTTCCCACGTATAAATAATATAAGATTTTGATTACTTCCACCATCTTTAACATTATTACTAGCCTCATCCGCAGTTGAAAGAGGAGCTGGTACCGGGTGAACAGTTTATCCCCCTTTATCCAGAAACTTATCTCACGCTGGACCCTCAGTAGATCTAGCCATTTTCTC…	Uroteuthis duvaucelii	Not mislabeled
MOBIL10900-20	University of Calgary	Jan 28 2020	2020	Safeway, Calgary	Grocery	Uncooked Pacific White Shrimp	9.99	AACATTATACTTTATCTTCGGGGCTTGAGCTGGAATAGTAGGTACCGCTCTTAGACTTATTATCCGAGCTGAATTAGGTCAACCTGGGAGCCTCATTGGGGATGATCAAATTTATAACGTAGTTGTCACAGCTCACGCTTTTGTAATAATTTTTTTTATAGTTATACCAATTATAATTGGAGGATTTGGTAATTGACTAGTACCTTTAATGTTAGGTGCCCCAGATATAGCCTTCCCTCGAATGAATAATATAAGCTTCTGGTTATTACCTCCTTCTCTTACATTGCTTTTATCAAGAGGAATGGTTGAAAGAGGTGTCGGAACCGGATGAACGGTATACCCTCCTTTATCTGCCAGTATTGCTCACGCTGGAGCTTCAGTAGATCTTGGAATTTTCTC…	Penaeus vannamei (100%), Litopenaeus vannamei (100%) (synonym)	Not mislabeled
MOBIL10903-20	University of Calgary	Jan 29 2020	2020	Co-op, Calgary	Grocery	Organic Black tiger shrimp	12.99	AACTCTATATTTTATTTTCGGAGCTTGAGCTGGAATAGTAGGTACAGCCCTTAGTCTTATTATTCGTGCTGAATTAGGTCAACCAGGAAGCCTTATTGGAGATGACCAAATTTACAATGTAGTAGTTACAGCTCACGCTTTCGTTATAATTTTCTTTATAGTTATGCCTATTATAATTGGAGGTTTCGGGAATTGGCTTGTCCCTTTAATGTTAGGTGCTCCAGATATGGCATTTCCCCGAATAAATAATATAAGTTTCTGACTTTTACCCCCTTCGCTAACTTTACTTTTATCTAGAGGTATAGTCGAAAGAGGAGTGGGAACTGGATGAACAGTATACCCTCCTTTATCAGCCAGAATTGCTCACGCAGGTGCTTCAGTTGATCTAGGTATTTTTTC…	Penaeus monodon	Not mislabeled
MOBIL10905-20	University of Calgary	Jan 29 2020	2020	Co-op, Calgary	Grocery	Raw shrimp tail on P&D	5.62	AACTCTATACTTTATTTTCGGAGCATGAGCTGGAATAGTAGGGACAGCTCTCAGTTTAATTATCCGGGCTGAACTAGGTCAACCAGGAAGACTTATTGGTGATGACCAAATCTATAACGTAGTAGTAACTGCTCACGCTTTTGTAATAATTTTCTTTATGGTAATACCAATTATAATTGGAGGGTTCGGAAACTGATTAGTACCCCTTATATTAGGTGCCCCAGATATAGCTTTCCCCCGAATAAATAATATAAGATTTTGACTCTTACCTCCTTCTCTAACTCTATTACTTTCTAGAGGAATAGTAGAAAGAGGAGTAGGAACAGGATGAACTGTTTATCCTCCCTTATCCGCCGGAATTGCTCACGCCGGAGCCTCTGTAGACCTAGGTATTTTCTC…	Pleoticus muelleri (100%), Pleoticus robustus (99.79%)	Not mislabeled
MOBIL10906-20	University of Calgary	Jan 29 2020	2020	Co-op, Calgary	Grocery	Pacific white shrimp	8.99	CTCATTGGGGATGATCAAATTTATAACGTAGTTGTCACAGCTCACGCTTTTGTAATAATTTTTTTTATAGTTATACCAATTATAATTGGAGGATTTGGTAATTGACTAGTACCTTTAATGTTAGGTGCTCCAGATATAGCCTTCCCTCGAATGAATAATATAAGCTTCTGNTTATTACCTCCTTCTCTCACATTGCTTTTATCAAGAGGAATNGTTGAAAGAGGTGTCGGAACCGGATGAACNGTATACCCTCCTTTATCTGCCAGTATTGCTCACGCTGGAGCTTCAGTAGATCTTGGAATTTTCTCTCTTCACTTAGCTGGNGTATCTTCTATTCTGGGAGCAGTAAACTTTATAACAACTGTAATCAATATACGATCTACAGGAATAACTATAGAC…	Penaeus vannamei (100%), Litopenaeus vannamei (99.61%) (synonym)	Not mislabeled
MOBIL10909-20	University of Calgary	Feb 1 2020	2020	Superstore, Calgary	Grocery	Frozen baby octopus	7.98	AACTTTATATTTTATCTTCGGAATTTGATCAGGTCTTTTAGGCACTTCATTAAGTTTAATAATCCGAACAGAATTAGGTCAGCCAGGATCATTATTAAATGATGATCAATTATATAATGTAATTGTAACAGCCCATGCATTTGTAATAATTTTTTTTCTTGTAATACCAGTAATAATTGGTGGATTTGGAAATTGATTAGTACCTTTAATATTAGGTGCACCAGATATAGCCTTCCCACGTATAAATAATATAAGATTCTGATTATTACCACCTTCATTAACTTTACTTCTTTCCTCCGCTGCAGTAGAAAGAGGTGTTGGTACCGGATGAACAGTTTACCCCCCTTTATCAAGAAATTTAGCCCATATAGGACCATCCGTTGATCTAGCAATTTTTTC…	Amphioctopus aegina	Product substitution
MOBIL10911-20	University of Calgary	Feb 1 2020	2020	Superstore, Calgary	Grocery	Cooked octopus tentacles	19.98	TACACTATACTTCATTTTTGGAATTTGATCAGGACTTTTAGGTACCTCCTTAAGTTTAATAATTCGAACAGAACTAGGACAACCAGGATCCCTCCTAAATGATGATCAACTATATAATGTAATTGTTACAGCTCACGCATTTGTTATAATTTTTTTTCTTGTTATACCAGTTATAATTGGAGGATTTGGAAACTGATTAGTTCCTTTAATACTAGGAGCACCAGATATAGCATTCCCACGAATAAATAACATAAGCTTCTGACTCTTACCTCCTTCTCTCACTCTTCTCCTTTCATCTGCAGCTGTTGAAAGAGGTGCAGGTACCGGATGAACCGTTTACCCACCTCTTTCAAGAAATTTAGCTCATATAGGACCCTCTGTTGATCTAGCAATTTTCTC…	Octopus vulgaris (100%), Octopus americanus (99.49%)	Not mislabeled
MOBIL10912-20	University of Calgary	Jan 30 2020	2020	Sobey's, Calgary	Grocery	Raw shimp and scallop (shrimp)		GAGCTGGAATAGTAGGTACCGCTCTTAGACTTATTATCCGAGCTGAATTAGGTCAACCTGGGAGCCTCATTGGGGATGATCAAATTTATAACGTAGTTGTCACAGCTCACGCTTTTGTAATAATTTTTTTTATAGTTATACCAATTATAATTGGAGGATTTGGTAATTGACTAGTACCTTTAATGTTAGGTGCCCCAGATATAGCCTTCCCTCGAATGAATAATATAAGCTTCTGGTTATTACCTCCTTCTCTTACATTGCTTTTATCAAGAGGAATGGTTGAAAGAGGTGTCGGAACCGGATGAACGGTATACCCTCCTTTATCTGCCAGTATTGCTCACGCTGGAGCTTCAGTAGATCTTGGAATTTTCTCTCTTCACTTAGCTGGAGTATCTTCTA…	Penaeus vannamei (100%), Litopenaeus vannamei (100%) (synonym)	Not mislabeled
MOBIL10914-20	University of Calgary	Jan 30 2020	2020	Sobey's, Calgary	Grocery	Raw shimp	24.99	ATAACGTAGTTGTCACAGCTCACGCTTTTGTAATAATTTTTTTTATAGTTATACCAATTATAATTGGAGGATTTGGTAATTGACTAGTACCTTTAATGTTAGGTGCTCCAGATATAGCCTTCCCTCGAATGAATAATATAAGCTTCTGGTTATTACCTCCTTCTCTCACATTGCTTTTATCAAGAGGAATGGTTGAAAGAGGTGTCGGAACCGGATGAACGGTATACCCTCCTTTATCTGCCAGTATTGCTCACGCTGGAGCTTCAGTAGATCTTGGAATTTTCTCTCTTCACTTAGCTGGGGTATCTTCTATTCTGGGAGCAGTAAACTTTATAACAACTGTAATCAATATACGATCTACAGGAATAACTATAGACCGTATACCTCTATTTGTATGAG…	Penaeus vannamei (100%), Litopenaeus vannamei (99.36%) (synonym)	Not mislabeled
MOBIL10916-20	University of Calgary	Jan 28 2020	2020	Safeway, Calgary	Grocery	Torpedo bay oyster	1.49	GAGCTGTTCTTGCGGGAACTAGGTTTAGGTCTCTTATTCGTTGGAGACTTTATAACCCTGGAGCTAAGTTTTTAGACCCCGTGACTTATAATGCAGTTGTAACTAGGCATGCGTTGGTTATGATTTTTTTCTTTGTTATACCTGTAATAATTGGGGGGTTTGGTAACTGGCTTATCCCTTTGATGCTTCTAGTAGCAGACATGCAATTTCCTCGATTAAATGCATTTAGATTTTGAGTTTTGCCAGGGTCTCTTTATCTTATGCTTATGTCTAACATTGTAGAAAACGGAGTTGGGGCAGGGTGAACAATTT	Magallana gigas	Semantic mislabeling
MOBIL10917-20	University of Calgary	Jan 28 2020	2020	Safeway, Calgary	Grocery	Ocean Wise Lucky 88 oyster	1.49	GAGCTGTTCTTGCGGGAACTAGGTTTAGGTCTCTTATTCGTTGGAGACTTTATAACCCTGGAGCTAAGTTTTTAGACCCCGTGACTTATAATGCAGTTGTAACTAGGCATGCGTTGGTTATGATTTTTTTCTTTGTTATACCTGTAATAATTGGGGGGTTTGGTAACTGGCTTATCCCTTTGATGCTTCTAGTAGCAGACATGCAATTTCCTCGATTAAATGCATTTAGATTTTGAGTTTTGCCAGGGTCTCTTTATCTTATGCTTATGTCTAACATTGTAGAAAACGGAGTTGGGGCAGGGTGAACAATTTACCCTCCTTTATCAACTTACTCTTATCATGGAGTTTGTATAGACCTTGCAATTCTAAGCCTTCACCTTGCTGGTATTAGCTCTATTT…	Magallana gigas	Not mislabeled
MOBIL10923-20	University of Calgary	Jan 29 2020	2020	Safeway, Calgary	Grocery	Ocean Wise Malpeque oyster		GAGCTGTTCTTGCGGGAACTAGGTTTAGGTCTCTTATTCGTTGGAGACTTTATAACCCTGGAGCTAAGTTTTTAGACCCCGTGACTTATAATGCAGTTGTAACTAGGCATGCGTTGGTTATGATTTTTTTCTTTGTTATACCTGTAATAATTGGGGGGTTTGGTAACTGGCTTATCCCTTTGATGCTTCTAGTAGCAGACATGCAATTTCCTCGATTAAATGCATTTAGATTTTGAGTTTTGCCAGGGTCTCTTTATCTTATGCTTATGTCTAACATTGTAGAAAACGGAGTTGGGGCAGGGTGAACAATTTACCCTCCTTTATCAACTTACTCTTATCATGGAGTTTGTATAGACCTTGCAATTCTAAGCCTTCACCTTGCTGGTATTAGCTCTATTT…	Magallana gigas	Product substitution
MOBIL10924-20	University of Calgary	Jan 29 2020	2020	Co-op	Grocery	Octopus whole	$13.15/lb	CACACTATACTTCATTTTTGGAATTTGATCAGGACTTTTAGGTACCTCCTTAAGTTTAATAATTCGAACAGAACTAGGACAACCAGGATCCCTCCTAAATGATGATCAATTATATAATGTAATTGTTACAGCTCACGCATTTGTTATAATTTTTTTTCTTGTTATACCAGTTATAATTGGAGGATTTGGAAACTGATTAGTTCCTTTAATACTAGGAGCACCAGATATAGCATTCCCACGAATAAATAACATAAGCTTCTGACTCTTACCTCCTTCTCTCACTCTTCTCCTTTCATCTGCAGCTGTTGAAAGTGGTGCAGGTACCGGATGAACCGTTTACCCACCTCTTTCAAGAAATTTAGCTCATATAGGACCCTCTGTTGATCTAGCAATTTTCTC…	Octopus vulgaris	Not mislabeled
MOBIL10925-20	University of Calgary	Jan 29 2020	2020	Co-op, Calgary	Grocery	Fresh oyster in shell: Malpec from N.B.	1.5	GGGCAGTTTTAGCTGGGACCAGTTTTAGGTCTCTTATTCGCTGAAGTCTTTATACTCCTGGGGCTAAATTTTTAGAGCCTGTTGTGTATAACGCTGTGGTAACGAGTCACGCGTTAGTAATGATTTTCTTCTTTGTTATGCCAGTAATAATTGGTGGGTTTGGTAATTGGCTTATTCCGCTTATACTTGAAGTGGCAGACATGCAGTTCCCTCGATTAAATGCTTTTAGATTCTGAGTATTGCCAGGGTCATTGCTGCTAATATTGATGTCAAATATGTCTGAGAGAGGAGTTGGGTCAGGATGAACCATTTACCCTCCGCTGTCAACTTTTTCTTACCATGGAGTTTGCATGGATTTTGCCATTTTAAGGTTACACTTAGCAGGTATTAGGTCTATTT…	Crassostrea virginica	Semantic mislabeling
MOBIL10926-20	University of Calgary	Jan 29 2020	2020	Co-op, Calgary	Grocery	Atlantic mussels fresh	0.02	GACTCTTTATCTATATAGTGGGGTCTGAGGAGGTTTGTTCGGGGCAAGGTTAAGTCTGATAATTCGGATACAGTTAGGGCATCCTGGAGCAGTATTTTTAAAAAGAGATTGGTTTTATAATGTGGTTGTTACAACACACGCCTTAATAATAATTTTTTTTGCTGTAATACCCATTCTAATCGGAGCTTTTGGTAATTGGCTGATTCCTCTATTAGTAGGTGGTAAAGATATAATTTATCCGCGGATAAATAATTTGAGCTATTGGTTATCTCCTAATGCGCTATATTTACTTATATTATCTTTTAGAACGGATAAAGGGGTAGGTGCTGGATGGACTATTTACCCACCATTGTCTGTATATCCTTATCATAGCGGGCCGAGGATAGATGTTCTTATTGT…	Mytilus sp. 2 (99.2%), Mytilus edulis (99.18%)	Semantic mislabeling
MOBIL10931-20	University of Calgary	Feb 1 2020	2020	Safeway, Calgary	Grocery	Shrimp raw shell-on	0.23	TAGTAGGTACCGCTCTTAGACTTATTATCCGAGCTGAATTAGGTCAACCTGGGAGCCTCATTGGGGATGATCAGATTTATAACGTAGTTGTCACAGCTCACGCTTTTGTAATAATTTTTTTTATAGTTATACCAATTATAATTGGAGGATTTGGTAATTGACTAGTACCTTTAATGTTAGGTGCCCCAGATATAGCCTTCCCTCGAATGAATAATATAAGCTTCTGGTTATTACCTCCTTCTCTTACATTGCTTTTATCAAGAGGAATGGTTGAAAGAGGTGTCGGAACCGGATGAACGGTATACCCTCCTTTATCTGCCAGTATTGCTCACGCTGGAGCTTCAGTAGATCTTGGAATTTTCTCTCTTCACTTAGCTGGAGTATCTTCTATTCTGGGAG…	Penaeus vannamei (100%), Litopenaeus vannamei (99.8%) (synonym)	Not mislabeled
MOBIL10932-20	University of Calgary	Feb 1 2020	2020	Safeway, Calgary	Grocery	Ocean Wise Malpeque oyster	1	GGGCAGTTTTAGCTGGGACCAGTTTTAGGTCTCTTATTCGCTGAAGTCTTTATACTCCTGGGGCTAAATTTTTAGAGCCTGTTGTGTATAACGCTGTGGTAACGAGTCACGCGTTAGTAATGATTTTCTTCTTTGTTATGCCAGTAATAATTGGTGGGTTTGGTAATTGGCTTATTCCGCTTATACTTGAAGTGGCAGACATGCAGTTCCCTCGATTAAATGCTTTTAGATTCTGAGTATTGCCAGGGTCATTGCTGCTAATATTGATGTCAAATATGTCTGAGAGAGGAGTTGGGTCAGGATGAACCATTTACCCTCCGCTGTCAACTTTTTCTTACCATGGAGTTTGCATGGATTTTGCCATTTTAAGGTTACACTTAGCAGGTATTAGGTCTATTT…	Crassostrea virginica	Semantic mislabeling
MOBIL10934-20	University of Calgary	Jan 31 2020	2020	Safeway, Calgary	Grocery	Pacific white shrimp		GAGCTGGAATAGTAGGTACCGCTCTTAGACTTATTATCCGAGCTGAATTAGGTCAACCTGGGAGCCTCATTGGGGATGATCAAATTTATAACGTAGTTGTCACAGCTCACGCTTTTGTAATAATTTTTTTTATAGTTATACCAATTATAATTGGAGGATTTGGTAATTGACTAGTACCTTTAATGTTAGGTGCCCCAGATATAGCCTTCCCTCGAATGAATAATATAAGCTTCTGGTTATTACCTCCTTCTCTTACATTGCTTTTATCAAGAGGAATGGTTGAAAGAGGTGTCGGAACCGGATGAACGGTATACCCTCCTTTATCTGCCAGTATTGCTCACGCTGGAGCTTCAGTAGATCTTGGAATTTTCTCTCTTCACTTAGCTGGAGTATCTTCTA…	Penaeus vannamei (100%), Litopenaeus vannamei (100%) (synonym)	Not mislabeled
MOBIL10935-20	University of Calgary	Jan 31 2020	2020	Safeway, Calgary	Grocery	Uncooked colossal freshwater shrimp		GAGCAGGCATGGTAGGTACGTCACTAAGACTCTTAATTCGAGCAGAATTAGGGCAGCCGGGCAGACTGATCGGAAATGACCAAATCTACAACGTAATTGTCACTGCCCACGCATTCGTGATAATTTTCTTCATAGTTATACCGATCATAATTGGTGGTTTCGGTAATTGACTAGTACCCCTAATATTAGGGGCCCCAGACATAGCATTCCCACGCATAAACAACATAAGATTCTGACTCCTACCTCCATCTCTAACACTTCTTCTCTCCAGAGGAATAGTAGAAAGAGGGGTTGGCACAGGATGAACTGTTTATCCACCACTAGCAGCTGGTACCGCCCACGCCGGGGCATCAGTAGATCTAGGTATTTTTTCCCTCCACCTAGCAGGAGTTTCTTCAA…	Macrobrachium rosenbergii	Semantic mislabeling
MOBIL10936-20	University of Calgary	Feb 1 2020	2020	Safeway, Calgary	Grocery	Cuttlefish		TACTTTATACTTTATTTTTGGTATTTGATCCGGTTTATTGGGCACATCATTAAGATTAATAATCCGAAGAGAACTTGGTAAGCCAGGAACCTTATTAAACGATGATCAATTATATAATGTTATAGTAACTGCACACGGTTTTATTATAATTTTTTTTTTAGTTATACCTATTATAATTGGAGGTTTTGGTAACTGATTAGTACCTTTAATACTAGGTGCCCCAGATATAGCATTCCCACGAATAAATAATATAAGATTTTGATTATTACCTCCTTCATTAACATTATTATTATCCTCCTCTGCAGTAGAAAGTGGTGCAGGTACTGGATGAACTATTTATCCTCCTCTATCTAGAAACCTTTCACATGCAGGTCCTTCAGTAGATCTTGCTATTTTCTC…	Sepia recurvirostra	Not mislabeled
MOBIL10937-20	University of Calgary	Feb 1 2020	2020	Safeway, Calgary	Grocery	Mussels		GACTCTTTATCTATATAGTGGGGTCTGAGGAGGTTTGTTCGGGGCAAGGTTAAGTCTGATAATTCGGATACAGTTAGGGCATCCTGGAGCAGTATTTTTAAAAAGAGATTGGTTTTATAATGTGGTTGTTACAACACACGCCTTAATAATAATTTTTTTTGCTGTAATACCCATTCTAATCGGAGCTTTTGGTAATTGGCTGATTCCTCTATTAGTAGGTGGTAAAGATATAATTTATCCGCGGATAAATAATTTGAGCTATTGGTTATCTCCTAATGCGCTATATTTACTTATATTATCTTTTAGAACGGATAAAGGGGTAGGTGCTGGATGGACTATTTACCCACCATTGTCTGTATATCCTTATCATAGCGGGCCGAGGATAGATGTTCTTATTGT…	Mytilus sp. 2 (99.1%), Mytilus edulis (99.08%), Mytilus galloprovincialis (98.42%)	Not mislabeled
MOBIL1901-16	University of Calgary	Fall 2016	2016	King's Seafood	Market	Cuttlefish balls	6.71	ACCAGCAATTTCACAATATCAAACACCTTTATTTGTATGGGCTGTCTTAATTACAGCTGTTCTTCTATTATTATCTCTACCAGTACTGGCTGCCGGCATTACTATACTCCTAACAGATCGAAACCTAAATACTACATTCTTTGATCCTGCAGGCGGAGGAGATCCTATTTTATATCAAC	Pangasius bocourti, Pangasius djambal, Pangasianodon hypophthalmus	Product substitution
MOBIL5841-17	Ambrose University	Sept 27 2017	2017	Haru Sushi and Grill	Sushi	king crab	5	CACCCTCTATCTCGTATTTGGTGCTTGAGCCGGCATAGTCGGAACAGCCCTAAGCCTGCTCATCCGAGCAGAACTTAGTCAACCAGGCGCACTCCTGGGCGACGATCAAATTTATAACGTAATCGTCACGGCACACGCCTTCGTAATAATTTTCTTTATAGTAATACCGTTAATAATTGGGGGCTTTGGAAACTGACTCGTCCCCCTAATGATCGGAGCCCCCGACATAGCCTTCCCCCGAATAAATAACATAAGCTTCTGACTTCTCCCTCCATCTTTCCTGCTCCTTCTAGCATCTTCCGGAGTAGAAGCCGGGGCCGGGACAGGTTGAACAGTATATCCCCCTCTCGCAAGCAATCTTGCCCACGCTGGCGCCAGCGTGGACCTCACTATTTTCTC…	Merluccius angustimanus, Merluccius productus, Merluccius sp. OC219, OC238, Merluccius gayi, Merluccius gayi peruanus, Merliuccius gayi gayi	Product substitution
MOBIL6913-18	Ambrose University	March 5 2018	2018	Lucky Supermarket	Grocery	ChoripDong Seafood Mix - Octopus	$7.29/pk	AACACTATATTTTATTTTTGGAATCTGATCAGCTCTTCTAGGAACTTCTTTAAGATTAATAATTCGTACTGAATTAGGTCAACCAGGTTCACTACTCAATGATGATCAACTTTATAATGTTATTGTAACTGCACATGCATTTGTAATAATTTTTTTTTTAGTAATACCTGTTATAATCGGAGGATTTGGAAATTGATTAGTTCCTTTAATATTAGGTGCACCAGATATAGCATTCCCCCGAATAAATAATATAAGATTTTGACTTCTTCCTCCTTCCCTAACCTTATTATTAACCTCTGCAGCTGTTGAAAGAGGGGTAGGAACAGGATGAACTGTATATCCTCCTTTATCAAGAAATCTCGCTCATACAGGACCATCTGTAGACCTAGCAATTTTCTC…	Octopus minor (100%), Callistoctopus minor (100%) (synonym), Octopus variabilis (99.84%), Callistoctopus aff. Minor II RX-2020 (99.42%), Octopus fusiformis (98.87%)	Not mislabeled
MOBIL6914-18	Ambrose University	March 5 2018	2018	Lucky Supermarket	Grocery	ChoripDong Seafood Mix - Mussel Meat	$7.29/pk	GATGATTTTTTTTGCTGTAATACCAATCTTAATCGGGGCTTTTGGCAATTGGCTTATTCCTTTATTGGTAGGAGGTAAGGATATAATTTACCCTCGGATAAATAATTTGAGATATTGACTGTCTCCAAACGCATTGTACTTACTCATACTATCTTTTAGGACAGATAAAGGGGTGGGCGCTGGATGGACTGTATACCCTCCATTGTCTAGATACCCCTATCATAGAGGGCCAAGAATAGACGTCCTTATTGTGGCGCTTCATTTAGCTGGAGTTAGATCCTTAGTAGGAGCTATTAATTTTGCCAGGACTAACAAAAACATACCAGCTTTGGAGATAAAAGGGGAGCGAGCTGAGCTTTATGTTTTAAGAATTAGGGTCACCGCAGTGCTTCTAATTAT…	Mytilus galloprovincialis	Not mislabeled
MOBIL6916-18	Ambrose University	March 5 2018	2018	Lucky Supermarket	Grocery	ChoripDong Seafood Mix - Squid	$7.29/pk	TACCTTATATTTTATCTTTGGTATCTGGGCAGGACTATTAGGTACATCATTAAGATTAATGATTCGTACCGAATTAGGTCAACCCGGATCTTTATTAAATGATGATCAATTATATAACGTAGTAGTTACTGCTCACGGATTCATTATAATTTTTTTCATAGTTATACCTATTATAATTGGAGGATTTGGTAACTGGTTAGTTCCCTTAATATTAGGTGCTCCAGATATAGCATTCCCACGTATAAACAATATAAGATTCTGACTACTTCCTCCATCCTTAACTCTTTTATTAGCTTCATCTGCTGTAGAAAGAGGAGCCGGAACAGGTTGAACAGTTTATCCCCCTTTATCTAGGAATTTATCCCATGCTGGTCCTTCAGTTGATCTAGCAATTTTCTC…	Todarodes pacificus	Not mislabeled
MOBIL6917-18	Ambrose University	March 5 2018	2018	Hana Sushi (sampled two each)	Sushi	Hokkigai (surfclam)	$3.90/2 pc	CATTATACTTTGTGTTTTCTTATTGGGCTGGTATTATGGGCACTGGGTTCAGGGTAATTATCCGTATGGAGCTTGCTATGCCCGGAGAGATTTTGATAGATGCTCAGGTGTATAATGTAATTATTACGTCTCATGCTTTAGTTATGATTTTTTTTCTCGTTATACCCATGATGATAGGGGGGTTTGGAAATTGACTGGTTCCTTTAATGTTAAAGGTTCCTGATATAAGTTTTCCTCGAATAAATAATGTGAGATTCTGACTTTTACCAATCTCGATAATGCTTTTAATAGTATCGCCCTATGTCGAGGGCGGTGCTGGTACTGGGTGGACTATTTATCCACCGCTATCTAGGACTTTAGGTCATCCTGGCCCGGCAATAGATTACGTGATTTTTTCCC…	Pseudocardium sachalinense (99.48%)	Product substitution
MOBIL6920-18	Ambrose University	March 5 2018	2018	Hana Sushi (sampled two each)	Sushi	Tako (octopus)	$4.90/2 pc	TACACTATACTTCATTTTTGGAATTTGATCAGGACTTTTAGGTACCTCCTTAAGTTTAATAATTCGAACAGAACTAGGACAACCAGGATCCCTCCTAAATGATGATCAACTATATAATGTAATTGTTACAGCTCACGCATTTGTTATAATTTTTTTTCTTGTTATACCAGTTATAATTGGAGGATTTGGAAACTGATTAGTTCCTTTAATACTAGGAGCACCAGATATAGCATTCCCACGAATAAATAACATAAGCTTCTGACTCTTACCTCCTTCCCTCACTCTTCTCCTTTCATCTGCAGCTGTTGAAAGAGGTGCAGGTACCGGATGAACCGTTTACCCACCTCTTTCAAGAAATTTAGCTCATATAGGACCCTCTGTTGATCTAGCAATTTTCTC…	Octopus vulgaris (100%), Octopus americanus (99.16%)	Not mislabeled
MOBIL6921-18	Ambrose University	March 5 2018	2018	Fusion sushi (sampled two each)	Sushi	Calamari	$6.95/pc	TACCTTATATTTTATCTTTGGTATCTGGGCAGGAcTATTAGGTACATCATTAAGATTAATGATTCGTACCGAATTAGGTCAACCCGGATCTTTATTAAATGATGATCAATTATATAACGTAGTAGTTACTGCTCACGGATTCATTATAATTTTTTTCATAGTTATACCTATTATAATTGGAGGATTTGGTAACTGGTTAGTTCCCTTAATATTAGGTGCTCCAGATATAGCATTCCCACGTATAAACAATATAAGATTCTGACTACTTCCTCCATCCTTAACTCTTTTATTAGCTTCATCTGCTGTAGAAAGAGGAGCCGGAACAGGTTGAACAGTTTATCCCCCTTTATCTAGGAATTTATCCCATGCTGGTCCTTCAGTTGATCTAGCAATTTTCTC…	Todarodes pacificus	Not mislabeled
MOBIL6924-18	Ambrose University	March 5 2018	2018	Edo	Sushi	Shrimp roll	$3.75/4 pc	GGGCTTGAGCTGGAATAGTAGGTACCGCTCTTAGACTTATTATCCGAGCTGAATTAGGTCAACCTGGGAGCCTCATTGGGGATGATCAAATTTATAATGTAGTTGTCACAGCTCACGCTTTTGTAATAATTTTTTTTATAGTTATACCAATTATAATTGGAGGATTTGGTAATTGACTAGTACCTTTAATGTTAGGTGCCCCAGATATAGCCTTCCCTCGAATGAATAATATAAGCTTCTGGTTATTACCTCCTTCTCTTACATTGCTTTTATCAAGAGGAATGGTTGAAAGAGGTGTCGGAACCGGATGAACGGTATACCCTCCTTTATCTGCCAGTATTGCTCACGCTGGAGCTTCAGTAGATCTTGGAATTTTCTCTCTTCACTTAGCTGGAGTAT…	Penaeus vannamei (100%), Litopenaeus vannamei (99.83%) (synonym)	Not mislabeled
MOBIL6925-18	Ambrose University	March 5 2018	2018	Sushi Ginza	Sushi	Ika (squid)	$5.00/2 pc	TTTATATTTTATTTTTGGAATTTGATCCGGCTTACTAGGTACATCATTAAGATTAATAATCCGAAGAGAATTAGGTAAACCAGGAACTCTATTAAATGATGATCAATTATATAATGTTATAGTAACAGCACATGGTTTTATTATAATTTTTTTTTTAGTTATACCTATTATAATTGGGGGTTTCGGAAACTGGTTAGTACCATTAATATTAGGTGCTCCAGATATAGCATTTCCACGTATAAATAATATAAGTTTTTGACTTTTACCTCCTTCACTAACACTATTATTATCATCTTCTGCAGTAGAAAGAGGTGCAGGTACAGGATGGACTGTCTATCCTCCTTTATCTAGTAATCTTTCACATGCTGGACCTTCAGTAGACCTGGCCATCTTCTCATT…	Sepia aculeata	Product substitution
MOBIL6928-18	Ambrose University	March 5 2018	2018	Sushi Ginza	Sushi	Hokkigai (surf clam)	$5.00/2 pc	GGTGGACTATTTATCCACCGCTATNTAGGACTNTAGGTCATCCNGGCCCGGCAATAGATTACGTGATTTTTTCCCTTCATGTGGGNGGCTTGTCTTCTAT	Pseudocardium sachalinense	Product substitution
MOBIL6929-18	Ambrose University	March 5 2018	2018	A+ Buffet Sushi Bar	Sushi	Shrimp sushi	$1.50/pc	AACATTATACTTTATCTTCGGGGCTTGAGCTGGAATAGTAGGTACCGCTCTTAGACTTATTATCCGAGCTGAATTAGGTCAACCTGGGAGCCTCATTGGGGATGATCAAATTTATAACGTAGTTGTCACAGCTCACGCTTTTGTAATAATTTTTTTTATAGTTATACCAATTATAATTGGAGGATTTGGTAATTGACTAGTACCTTTAATGTTAGGTGCCCCAGATATAGCCTTCCCTCGAATGAATAATATAAGCTTCTGGTTATTACCTCCTTCTCTTACATTGCTTTTATCAAGAGGAATGGTTGAAAGAGGTGTCGGAACCGGATGAACGGTATACCCTCCTTTATCTGCCAGTATTGCTCACGCTGGAGCTTCAGTAGATCTTGGAATTTTCTC…	Penaeus vannamei (100%), Litopenaeus vannamei (100%) (synonym)	Not mislabeled
MOBIL6931-18	Ambrose University	March 5 2018	2018	Hana Sushi (sampled two each)	Sushi	Ebi (steamed prawn)	$3.90/2 pc	TTGGGGATGATCAAATTTATAACGTAGTTGTCACAGCTCACGCTTTTGTAATAATTTTTTTTATAGTTATACCAATTATAATTGGAGGATTTGGTAATTGACTAGTACCTTTAATGTTAGGTGCTCCAGATATAGCCTTCCCTCGAATGAATAATATAAGCTTCTGGTTATTACCTCCTTCTCTCACATTGCTTTTATCAAGAGGAATGGTTGAAAGAGGTGTCGGAACCGGATGAACGGTATACCCTCCTTTATCTGCCAGTATTGCTCACGCTGGAGCTTCAGTAGATCTTGGAATTTTCTCTCTTCACTTAGCTGGGGTATCTTCTATTCTGGGAGCAGTAAACTTTATAACAACTGTAATCAATATACGATCTACAGGAATAACTATAGACCGTA…	Penaeus vannamei (100%), Litopenaeus vannamei (99.4%) (synonym)	Not mislabeled
MOBIL6932-18	Ambrose University	March 5 2018	2018	Hana Sushi (sampled two each)	Sushi	Kani (real crab meat)	$4.90/2 pc	CACATTATATTTTATTTTTGGGGCGTGAGCGGGAATAGTTGGAACCTCTCTTAGATTAATTATCCGTGCTGAACTAGGCCAACCAGGGGCCCCTAATTGGAAACGATCAAATCTATAACGTAGTTGTTACTGCCCATGCTTTTGTTATAATTTTTTTCATAGTAATACCCATTATAATTGGAGGGTTTGGCAATTGATTAGTCCCTCTTATATTAGGAGCACCTGATATGGCCTTCCCTCGTATAAATAACATAAGTTTCTGACTTTTACCTCCCTCCTTAACACTCCTCCTTATAAGAGGGATAGTAGAAAGGGGAGTTGGAACAGGTTGGACAGTTTACCCCCCTTTAGCAAGGGCAATTGCCCATGCAGGAGCCTCAGTCGATATAGGTATTTTCT…	Cancer irroratus (99.84%)	Not mislabeled
MOBIL6935-18	Ambrose University	March 5 2018	2018	Sho	Sushi	Uni	$2.50/pc	AACACTTTATTTGATTTTTGGAGCCTGAGCTGGCATGGTAGGGACAGCTATGAGTGTAATTATCCGTGCCGAATTGGCACAACCCGGTTCTCTACTAAAAGATGACCAAATCTACAAAGTAGTCGTTACCGCACACGCACTGGTCATGATTTTCTTCATGGTGATGCCAATAATGATTGGAGGGTTTGGGAATTGACTCATTCCGCTAATGATTGGTGCACCAGACATGGCTTTCCCCCGTATGAAAAATATGAGATTTTGACTTATTCCCCCTTCCTTTATCTTACTTCTCGCTTCTGCAGGAGTAGAAAGAGGGGCAGGAACTGGATGAACTATTTATCCCCCCCTCTCTAGTAAAATAGCACACGCCGGAGGATCCGTTGACTTAGCGATCTTTTC…	Strongylocentrotus purpuratus, Mesocentrotus franciscanus	Semantic mislabeling
MOBIL6936-18	Ambrose University	March 5 2018	2018	Sho	Sushi	Scallop	$2.20/pc	GAATGCCTTTAGGTTTTGGTTGGTGCCTCCTGCTCTTTATATGGTAGTGTCTTCTTCTTTTATGGACGGGCTAAGAGGAACTGGGTGGACTATGTACCCTCCGCTCTCTAGAACCCCGTACCACGGGGGTATTAGAACGGACATGGTTATTTTAGGGCTGCATTTGGCTGGGGTAAGGTCTTCTGCTGCTTCTATTAATTATTTAGTTACTTTTTTAAATGTTCGGGGCCTTGCTTATAAGGCGGAGTTTGCTCCTCCTTTTGCGTGGGCTTTGACTGTGACTAGGTTTTTGTTGTTAATTTCAATTCCTGTGTTGGCGGGGGGGCTAACAATGTTGATTTTAGATCGGCA	Placopecten magellanicus	Not mislabeled
MOBIL6940-18	Ambrose University	March 5 2018	2018	Hana Sushi (sampled two each)	Sushi	Ika (squid)	$3.90/2 pc	TTTATTATAATTTTTTTTTTAGTTATACCTATTATAATTGGAGGTTTTGGTAACTGATTAGTACCTTTAATACTAGGTGCCCCAGATATAGCATTCCCACGAATAAATAATATAAGATTTTGATTATTACCTCCTTCATTAACATTATTATTATCGTCCTCTGCAGTAGAAAGTGGTGCAGGTACTGGATGAACTGTTTATCCTCCTCTATCTAGAAACCTTTCACATGCAGGTCCTTCAGTAGATCTTGCTATTTTCTCCCTACATCTAGCAGGTGTTTCTTCAATTTTAGGAGCTATTAACTTTATTACAACCATTTTAAATATACGATGAGAAGGTTTACAAATAGAACGTTTACCTTTATTTGTTTGATCAGTTTTCATTACCGCTATTTTATTA…	Sepia recurvirostra (99.8%)	Product substitution
MOBIL6941-18	Ambrose University	March 5 2018	2018	Superstore	Grocery	Anchor's Bay - Raw Octopus (Seafood Medley)	$3.98/pk	CCTTATATTTTATCTTTGGTATCTGGGCAGGACTATTAGGTACATCATTAAGATTAATGATTCGTACCGAATTAGGTCAACCCGGATCTTTATTAAATGATGATCAATTATATAACGTAGTAGTTACTGCTCACGGATTCATTATAATTTTTTTCATAGTTATACCTATTATAATTGGAGGATTTGGTAACTGGTTAGTTCCCTTAATATTAGGTGCTCCAGATATAGCATTCCCACGTATAAACAATATAAGATTCTGACTACTTCCTCCATCCTTAACTCTTTTATTAGCTTCATCTGCTGTAGAAAGAGGAGCCGGAACAGGTTGAACAGTTTATCCCCCTTTATCTAGGAATTTATCCCATGCTGGTCCTTCAGTTGATCTAGCAATTTTCTCAC…	Todarodes pacificus	Product substitution
MOBIL6943-18	Ambrose University	March 5 2018	2018	Superstore	Grocery	Anchor's Bay - Raw Squid (Seafood Medley)	$3.98/pk	TACTCTCTATTTTATTTTCGGTATTTGAGCAGGACTATTAGGAACTTCTCTAAGACTAATAATCCGTACCGAACTAGGTCAACCCGGATCGCTACTAAATGATGATCAACTATATAACGTGGTGGTCACTGCACACGGTTTCATTATAATTTTCTTCTTAGTTATACCTATTATAATTGGAGGATTTGGTAACTGACTAGTTCCCTTAATATTAGGAGCCCCAGATATAGCTTTTCCACGTATAAACAACATGAGATTTTGGCTTCTTCCTCCTTCTCTAACCCTTCTACTAGCTTCTTCCGCTGTAGAAAGAGGAGCAGGAACAGGCTGAACTGTCTACCCTCCTTTATCTAGTAACTTATCCCATGCAGGCCCTTCAGTTGATTTAGCTATTTTCTC…	D. sp. USNM IZ 1411890 (100%), Dosidicus gigas (100%), Dosidicus environmental sample (99.83%)	Not mislabeled
MOBIL6945-18	Ambrose University	March 5 2018	2018	A+ Buffet Sushi Bar	Sushi	Crab sushi	$1.50/pc	CCTCCAGCCATTTCCCAGTACCAAACGCCCCTATTCGTATGGGCAGTACTTATTACAGCCGTTCTACTCCTTCTTTCTCTTCCTGTCTTAGCAGCCGGGATTACAATGCTCCTAACCGACCGCAACCTAAATACAACCTTCTTTGACCCTGCAGGAGGAGGAGACCCCA	Nemipterus hexodon	Product substitution
MOBIL6947-18	Ambrose University	March 5 2018	2018	A+ Buffet Sushi Bar	Sushi	Surf clam sushi	$1.50/pc	GCTTTAGTTATGATTTTTTTTCTCGTTATACCCATGATGATAGGGGGGTTTGGAAATTGACTGGTTCCTTTAATGTTAAAGGTTCCTGATATAAGTTTTCCTCGAATAAATAATGTGAGATTCTGACTTTTACCAATCTCGATAATGCTTTTAATAGTATCGCCCTATGTCGAGGGCGGTGCTGGTACTGGGTGGACTATTTATCCACCGCTATCTAGGACTTTAGGTCATCCTGGCCCGGCAATAGATTACGTGATTTTTTCCCTTCATGTGGGCGGCTTGTCTTCTATTTTAGCCTCAATTAATTTTTTTACAACGTTCCTTTGTATGCGTTTAAAGGTTATAAGGCTTTATCGTACGCCTCTTTTTGTGTGATGTATAGGTGTAACAGCTTTCCTT…	Pseudocardium sachalinense (99.53%)	Product substitution
MOBIL6948-18	Ambrose University	March 5 2018	2018	A+ Buffet Sushi Bar	Sushi	Octopus sushi	$1.50/pc	TACACTATACTTCATTTTTGGAATTTGATCAGGACTTTTAGGTACCTCCTTAAGTTTAATAATTCGAACAGAACTAGGACAACCAGGATCCCTCCTAAATGATGATCAATTATATAATGTAATTGTTACAGCTCACGCATTTGTTATAATTTTTTTCCTTGTTATACCAGTTATAATCGGAGGATTTGGAAACTGATTAGTTCCTTTAATACTAGGAGCACCAGATATAGCATTCCCACGAATAAATAATATAAGCTTCTGACTCTTACCTCCTTCTCTTACTCTTCTCCTTTCATCTGCAGCAGTTGAAAGAGGCGCAGGTACCGGATGAACCGTTTACCCGCCTCTTTCAAGAAATTTAGCTCATATAGGACCTTCTGTTGATCTAGCCATTTTCTC…	Octopus sinensis, Octopus vulgaris, Octopus oshimai, Octopus tetricus, Amphioctopus fangsiao	Not mislabeled
MOBIL6950-18	Ambrose University	March 5 2018	2018	Sushi Ginza	Sushi	Kani (crab meat)	$5.50/2 pc	ATATTTCATTTTTGGAGCATGAGCCGGAATAGTAGGTACATCTCTTAGATTAATTATTCGTGCTGAACTTGGTCAACCAGGTACATTAATTGGGAATGATCAAATTTATAATGTAGTAGTTACCGCGCATGCTTTTGTAATAATTTTTTTTATGGTTATGCCTATTATAATTGGGGGGTTTGGTAATTGACTTGTACCATTGATGTTAGGAGCCCCTGATATAGCTTTCCCTCGTATAAACAATATAAGATTCTGATTACTACCTCCTTCCTTAACTCTCCTTCTTATAAGTGGTATAGTAGAAAGAGGAGTTGGCACTGGTTGAACTGTCTACCCCCCTCTTGCAGCTGCGATTGCTCACGCAGGGGCATCTGTTGACATGGGTATTTTTTCCCTCCA…	Chaceon quinquedens (100%), Chaceon chuni (98.69%)	Product substitution
MOBIL6956-18	Ambrose University	March 5 2018	2018	Kinjo	Sushi	Tako	4.4	TACACTATACTTCATTTTTGGAATTTGATCAGGACTTTTAGGTACCTCCTTAAGTTTAATAATTCGAACAGAACTAGGACAACCAGGATCCCTCCTAAATGATGATCAACTATATAATGTAATTGTTACAGCTCACGCATTTGTTATAATTTTTTTTCTTGTTATACCAGTTATAATTGGAGGATTTGGAAACTGATTAGTTCCTTTAATACTAGGAGCACCAGATATAGCATTCCCACGAATAAATAACATAAGCTTCTGACTCTTACCTCCTTCTCTCACTCTTCTCCTTTCATCTGCAGCTGTTGAAAGAGGTGCAGGTACCGGATGAACCGTTTACCCACCTCTTTCAAGAAATTTAGCTCATATAGGACCCTCTGTTGATCTAGCAATTTTCTC…	Octopus vulgaris	Semantic mislabeling
MOBIL6958-18	Ambrose University	March 5 2018	2018	Sho	Sushi	Shrimp tempura	$5.00/pc	AACATTATACTTTATCTTCGGGGCTTGAGCTGGAATAGTAGGTACCGCTCTTAGACTTATTATCCGAGCTGAATTAGGTCAACCTGGGAGCCTCATTGGGGATGATCAAATTTATAACGTAGTTGTCACAGCTCACGCCTTTGTAATAATTTTTTTTATAGTTATACCAATTATAATTGGAGGATTTGGTAATTGACTAGTACCTTTAATGTTAGGTGCCCCAGATATAGCCTTCCCTCGAATGAATAATATAAGCTTCTGGTTATTACCTCCTTCTCTTACATTGCTTTTATCAAGAGGAATGGTTGAAAGAGGTGTCGGAACCGGATGAACGGTATACCCTCCTTTATCTGCCAGTATTGCTCACGCTGGAGCTTCAGTAGATCTTGGAATTTTCTC…	Penaeus vannamei (100%), Litopenaeus vannamei (99.83%) (synonym)	Not mislabeled
MOBIL6959-18	Ambrose University	March 5 2018	2018	Sho	Sushi	Tako Sashimi	$7.50/pc	CACACTATACTTCATTTTTGGAATTTGATCAGGACTTTTAGGTACCTCCTTAAGTTTAATAATTCGAACAGAACTAGGACAACCAGGATCCCTCCTAAATGATGATCAATTATATAATGTAATTGTTACAGCTCACGCATTTGTTATAATTTTTTTTCTTGTTATACCAGTTATAATTGGAGGATTTGGAAACTGATTAGTTCCTTTAATACTAGGAGCACCAGATATAGCATTCCCACGAATAAATAACATAAGCTTCTGACTCTTACCTCCTTCTCTCACTCTTCTCCTTTCATCTGCAGCTGTTGAAAGTGGTGCAGGTACCGGATGAACCGTTTACCCACCTCTTTCAAGAAATTTAGCTCATATAGGACCCTCTGTTGATCTAGCAATTTTCTC…	Octopus vulgaris	Semantic mislabeling
MOBIL6960-18	Ambrose University	March 5 2018	2018	Edo	Sushi	Nigiri ebi (steamed prawn)	$2.10/pc	CATTATACTTTATCTTCGGGGCTTGAGCTGGAATAGTAGGTACCGCTCTTAGACTTATTATCCGAGCTGAATTAGGTCAACCTGGGAGCCTCATTGGGGATGATCAAATTTATAACGTAGTTGTCACAGCTCACGCTTTTGTAATAATTTTTTTTATAGTTATACCAATTATAATTGGAGGATTTGGTAATTGACTAGTACCTTTAATGTTAGGTGCCCCAGATATAGCCTTCCCTCGAATGAATAATATAAGCTTCTGGTTATTACCTCCTTCTCTTACATTGCTTTTATCAAGAGGAATGGTTGAAAGAGGTGTCGGAACCGGATGAACGGTATACCCTCCTTTATCTGCCAGTATTGCTCACGCTGGAGCTTCAGTAGATCTTGGAATTTTCTCTC…	Penaeus vannamei (100%), Litopenaeus vannamei (100%) (synonym)	Not mislabeled
MOBIL6962-18	Ambrose University	March 5 2018	2018	A Mart (Korean grocery)	Grocery	Fisherman Brothers Frozen Seafood Mix - Shrimps	$4.99/pk	TGGGGATGACCAAATTTATAATGTTGTAGTAACTGCCCATGCCTTTGTTATAATTTTCTTCATAGTTATACCAATTATAATTGGTGGATTTGGTAATTGACTCGTACCCCTTATATTAGGAGCACCTGATATAGCATTTCCACGTATAAACAATATAAGATTCTGACTTTTACCTCCATCTCTTACACTACTCCTATCAAGAGGAATGGTAGAAAGAGGAGTCGGTACAGGATGAACTGTGTATCCCCCGCTAGCAGCAGGAATTGCCCACGCTGGAGCCTCAGTTGACATAGGAATTTTTTCACTACACCTCGCCGGAGTCTCATCAATTCTAGGTGCAGTTAATTTTATAACAACTGTTATTAACATACGCCCTGCGGGAATAACTATAGACCGTAT…	Metapenaeus affinis (99.82%)	Not mislabeled
MOBIL6963-18	Ambrose University	March 5 2018	2018	A Mart (Korean grocery)	Grocery	Fisherman Brothers Frozen Seafood Mix - Squid	$4.99/pk	TACCTTATATTTTATCTTTGGTATCTGGGCAGGACTATTAGGTACATCATTAAGATTAATGATTCGTACCGAATTAGGTCAACCCGGATCTTTATTAAATGATGATCAATTATATAACGTAGTAGTTACTGCTCACGGATTCATTATAATTTTTTTCATAGTTATACCTATTATAATTGGAGGATTTGGTAACTGGTTAGTTCCCTTAATATTAGGTGCTCCAGATATAGCATTCCCACGTATAAACAATATAAGATTCTGACTACTTCCTCCATCCTTAACTCTTTTATTAGCTTCATCTGCTGTAGAAAGAGGAGCCGGAACAGGTTGAACAGTTTATCCCCCTTTATCTAGGAATTTATCCCATGCTGGTCCTTCAGTTGATCTAGCAATTTTCTC…	Todarodes pacificus	Not mislabeled
MOBIL6964-18	Ambrose University	March 5 2018	2018	A Mart (Korean grocery)	Grocery	Fisherman Brothers Frozen Seafood Mix - Cooked Mussels	$4.99/pk	ATCTATATAGTGGGGTTTGAGGAGGTTTGTTCGGGGCAAGCCTAAGCCTGATAATTCGGATACAGTTAGGGCATCCTGGAGCAGTATTTTTAAAAAGAGATTGGTTTTATAATGTGGTTGTTACAACACACGCCTTAATAATAATTTTCTTTGCTGTAATACCTATTCTAATTGGAGCTTTTGGTAATTGGCTTATTCCTCTATTAGTAGGTGGTAAAGATATAATCTATCCGCGGATAAACAATTTGAGTTATTGGTTATCTCCTAATGCGCTATACTTACTTATATTATCTTTTAGAACGGATAAAGGAGTAGGCGCTGGATGGACTATTTACCCGCCACTGTCTGTATATCCTTATCATAGCGGGCCGAGGATAGATGTTCTTATTGTGTCCTTGC…	Mytilus galloprovincialis (99.19%), Mytilus sp. CHLF6 (99.16%), Mytilus sp. 3LT (99.16%), Mytilus sp. 5LT (98.82%), Mytilus edulis (98.784%), Mytilus sp. AUSF4 (98.66%), Mytilus sp. CHGF6 (98.66%), Mytilus sp. AFRF2 (98.66%), Mytilus sp. CHLF1 (98.66%), Mytilus sp. 8LT (98.65%), Mytilus sp. 2 SR-2017 (98.52%)	Not mislabeled
MOBIL6965-18	Ambrose University	March 5 2018	2018	T&T	Grocery	Grand Maple Seafood Medley - Squid and/or Cuttlefish	$4.99/pk	TACCTTATATTTTATCTTTGGTATCTGGGCAGGACTATTAGGTACATCATTAAGATTAATGATTCGTACCGAATTAGGTCAACCCGGATCTTTATTAAATGATGATCAATTATATAACGTAGTAGTTACTGCTCACGGATTCATTATAATTTTTTTCATAGTTATACCTATTATAATTGGAGGATTTGGTAACTGGTTAGTTCCCTTAATATTAGGTGCTCCAGATATAGCATTCCCACGTATAAACAATATAAGATTCTGACTACTTCCTCCATCCTTAACTCTTTTATTAGCTTCATCTGCTGTAGAAAGAGGAGCCGGAACAGGTTGAACAGTTTATCCCCCTTTATCTAGGAATTTATCCCATGCTGGTCCTTCAGTTGATCTAGCAATTTTCTC…	Todarodes pacificus	Not mislabeled
MOBIL6966-18	Ambrose University	March 5 2018	2018	T&T	Grocery	Grand Maple Seafood Medley - Shrimp	$4.99/pk	GTAGGAACCGCACTCAGTTTGATCATTCGAGCTGAACTAGGTCAACCCGGTAGACTCATGGGTGACGACCAAATCTATAACGTCGTAGTTACCGCTCACGCTTTCATCATAATTTTCTTTATAGTTATACCTATTATAATTGGAGGATTCGGAAACTGACTAGTACCTCTAATATTAGGAGCTCCTGATATAGCTTTTCCTCGAATAAATAATATAAGATTCTGACTCTTACCTCCATCCCTAACCCTCCTCCTCTCTAGAGGAATAGTAGAAAGAGGAGTTGGAACAGGATGGACTGTTTATCCTCCACTGTCAGCCGGAATCGCCCACGCAGGAGCCTCTGTAGATTTAGGAATCTTCTCCCTTCACCTAGCAGGAGTTTCTTCAATTCTAGGTGCA…	Solenocera crassicornis	Product substitution
MOBIL6967-18	Ambrose University	March 5 2018	2018	T&T	Grocery	Grand Maple Seafood Medley - Mussels	$4.99/pk	TACCCTTTATCTCTATAGAGGGGTGTGAGGAGGCCTATTTGGGGCAAGGCTAAGTTTAATAATCCGTATACAACTTGGTCACCCTGGGGCCGTATTCCTCAAAAGAGACTGGTTTTTTAATGTAGTGGTTACAACACATGCTTTAGTGATGATTTTTTTTGCTGTAATACCAATCTTAATCGGGGCTTTTGGCAATTGGCTTATCCCGTTACTGGTAGGAGGTAAGGACATAATTTACCCTCGGATAAATAATTTGAGATATTGACTGTCTCCAAACGCATTGTACTTACTCATACTATCTTTTAGGACAGATAAAGGGGTGGGTGCTGGATGGACTGTATACCCCCCATTGTCTAGATACCCCTATCATAGAGGGCCAAGAATAGACGTTCTTATTGT…	Mytilus galloprovincialis	Not mislabeled
MOBIL6968-18	Ambrose University	March 5 2018	2018	T&T	Grocery	Grand Maple Seafood Medley - Octopus	$4.99/pk	TACCTTATATTTTATCTTTGGTATCTGGGCAGGACTATTAGGTACATCATTAAGATTAATGATTCGTACCGAATTAGGTCAACCCGGATCTTTATTAAATGATGATCAATTATATAACGTAGTAGTTACTGCTCACGGATTCATTATAATTTTTTTCATAGTTATACCTATTATAATTGGAGGATTTGGTAACTGGTTAGTTCCCTTAATATTAGGTGCTCCAGATATAGCATTCCCACGTATAAACAATATAAGATTCTGACTACTTCCTCCATCCTTAACTCTTTTATTAGCTTCATCTGCTGTAGAAAGAGGAGCCGGAACAGGTTGAACAGTTTATCCCCCTTTATCTAGGAATTTATCCCATGCTGGTCCTTCAGTTGATCTAGCAATTTTCTC…	Todarodes pacificus	Product substitution
MOBIL6970-18	Ambrose University	March 5 2018	2018	Fusion sushi (sampled two each)	Sushi	Shrimp sushi	$3.50/pc	AACATTATACTTTATCTTCGGGGCTTGAGCTGGAATAGTAGGTACCGCTCTTAGACTTATTATCCGAGCTGAATTAGGTCAACCTGGGAGCCTCATTGGGGATGATCAAATTTATAACGTAGTTGTCACAGCTCACGCCTTTGTAATAATTTTTTTTATAGTTATACCAATTATAATTGGAGGATTTGGTAATTGACTAGTACCTTTAATGTTAGGTGCCCCAGATATAGCCTTCCCTCGAATGAATAATATAAGCTTCTGGTTATTACCTCCTTCTCTTACATTGCTTTTATCAAGAGGAATGGTTGAAAGAGGTGTCGGAACCGGATGAACGGTATACCCTCCTTTATCTGCCAGTATTGCTCACGCTGGAGCTTCAGTAGATCTTGGAATTTTCTC…	Penaeus vannamei (100%), Litopenaeus vannamei (99.83%) (synonym)	Not mislabeled
MOBIL6971-18	Ambrose University	March 5 2018	2018	Fusion sushi (sampled two each)	Sushi	Surf clam sushi	$3.50/pc	AACATTATACTTTGTGTTTTCTTATTGGGCTGGTATTATGGGCACTGGGTTCAGGGTAATTATCCGTATGGAGCTTGCTATGCCCGGAGAGATTTTGATAGATGCTCAGGTGTATAATGTAATTATTACGTCTCATGCTTTAGTTATGATTTTTTTTCTCGTTATACCCATGATGATAGGGGGGTTTGGAAATTGACTGGTTCCTTTAATGTTAAAGGTTCCTGATATAAGTTTTCCTCGAATAAATAATGTGAGATTCTGACTTTTACCAATCTCGATAATGCTTTTAATAGTATCGCCCTATGTCGAGGGCGGTGCTGGTACTGGGTGGACTATTTATCCACCGCTATCTAGGACTTTAGGTCATCCTGGCCCGGCAATAGATTACGTGATTTTTTC…	Pseudocardium sachalinense (99.83%)	Product substitution
MOBIL6973-18	Ambrose University	March 5 2018	2018	T&T	Grocery	Fish Balls Assorted - Squid	$15.41/kg	GAGGAGCAGGAACAGGCTGAACNGTCTACCCTCCTTTATCTAGTAACTTATCCCATGCAGGCCCTTCAGTTGATTTAGCTATTTTCTCCTTACATCTGGCTGGTGTTTCCTCTATTTTGGGAGCAATTAACTTTATTACCACTATTTTAAATATA	Dosidicus environmental sample, D. sp. USNM IZ 1411890, Dosidicus gigas	Not mislabeled
MOBIL6975-18	Ambrose University	March 5 2018	2018	Kinjo	Sushi	Cajun Prawn (2)	?	AACATTATACTTTATCTTCGGGGCTTGAGCTGGAATAGTAGGTACCGCTCTTAGACTTATTATCCGAGCTGAATTAGGTCAACCTGGGAGCCTCATTGGGGATGATCAAATTTATAANGTAGTTGTCACAGCTCACGCTTTTGTAATAATTTTTTTTATAGTTATACCAATTATAATTGGAGGATTTGGTAATTGACTAGTACCTTTAATGTTAGGTGCCCCAGATATAGCCTTCCCTCGAATGAATAATATAAGCTTCTGGTTATTACCTCCTTCTCTTACATTGCTTTTATCAAGAGGAATGGTTGAAAGAGGTGTCGGAACCGGATGAACGGTATACCCTCCTTTATCTGCCAGTATTGCTCACGCTGGAGCTTCAGTAGATCTTGGAATTTTCTC…	Penaeus vannamei (100%), Litopenaeus vannamei (100%) (synonym)	Not mislabeled
MOBIL6976-18	Ambrose University	March 5 2018	2018	T&T	Grocery	Fish Balls Assorted - Cuttlefish	$15.41/kg	GGCACTGGGTGAACAGTTTACCCGCCACTGGCAGGCAATCTCGCCCACGCAGGAGCATCGGTNGACCTGACCATCTTTTCTCTTCACCTAGCAGGTATCTCATCAATTCTNGGNGCAATTAATTTTATTACNACCATCATCAACATGAAACCCCCTGCTATCTCCCAGTACCAAACTCCCCTGTTCGTTTGGGCCGTTCTTATCACGGCTGTTCTTCTTCTTTTATCCCTACCAGTTCTTGCTGCCGGAATTACAATACTCCTCACCGATCGTAAC	Dentex tumifrons, Parargyrops edita, Evynnis cardinalis	Product substitution
MOBIL6977-18	Ambrose University	March 5 2018	2018	Kinjo	Sushi	Giant Squid Legs	5.6	TACCTTATATTTTATCTTTGGTATCTGGGCAGGACTATTAGGTACATCATTAAGATTAATGATTCGTACCGAATTAGGTCAACCCGGATCTTTATTAAATGATGATCAATTATATAACGTAGTAGTTACTGCTCACGGATTCATTATAATTTTTTTCATAGTTATACCTATTATAATTGGAGGATTTGGTAACTGGTTAGTTCCCTTAATATTAGGTGCTCCAGATATAGCATTCCCACGTATAAACAATATAAGATTCTGACTACTTCCTCCATCCTTAACTCTTTTATTAGCTTCATCTGCTGTAGAAAGAGGAGCCGGAACAGGTTGAACAGTTTATCCCCCTTTATCTAGGAATTTATCCCATGCTGGTCCTTCAGTTGATCTAGCAATTTTCTC…	Todarodes pacificus	Semantic mislabeling
MOBIL6978-18	Ambrose University	March 5 2018	2018	Fusion sushi (sampled two each)	Sushi	Octopus sushi	$4.00/pc	TACACTATACTTCATTTTTGGAATTTGATCAGGACTTTTAGGTACCTCCTTAAGTTTAATAATTCGAACAGAACTAGGACAACCAGGATCCCTCCTAAATGATGATCAACTATATAATGTAATTGTTACAGCTCACGCATTTGTTATAATTTTTTTTCTTGTTATACCAGTTATAATTGGAGGATTTGGAAACTGATTAGTTCCTTTAATACTAGGAGCACCAGATATAGCATTCCCACGAATAAATAACATAAGCTTCTGACTCTTACCTCCTTCTCTCACTCTTCTCCTTTCATCTGCAGCTGTTGAAAGAGGTGCAGGTACCGGATGAACCGTTTACCCACCTCTTTCAAGAAATTTAGCTCATATAGGACCCTCTGTTGATCTAGCAATTTTCTC…	Octopus vulgaris (100%), Octopus americanus (99.5%)	Not mislabeled
MOBIL6981-18	Ambrose University	March 5 2018	2018	Fusion sushi (sampled two each)	Sushi	Crab meat sushi	$3.00/pc	TGCTACTAACCTCTTCGGCAGTAGAAGCTGGAGCAGGGACTGGATGAACGGTTTACCCCCCGCTGGCCGGTAATCTAGCCCACGCAGGGGCCTCTGTAGACCTAGCCATCTTCTCACTACATTTAGCAGGTATCTCCTCGATTCTAGGGGCCATCAACTTCATCACGACAATCACCAACATAAAACCCCCTGCCATCTCCCTTTACCAGGTTCCCTTATTCGTCTGAGCCGTGCTGATTACAGCTGTTCTTCTCCTTCTGGCTCTTCCCGTCCTGGCTGCAGGCATCACTATACTTCTCACAGATCGAAATCTAAACACAACCTTCTTCGACCCGGCAGG	Priacanthus hamrur, Priacanthus prolixus	Product substitution
MOBIL6982-18	Ambrose University	March 5 2018	2018	T&T	Grocery	Ever Rich Seafood Mix - Squid Tentacles	$5.99/pk	ATATTTTATCTTTGGTATCTGGGCAGGACTATTAGGTACATCATTAAGATTAATGATTCGTACCGAATTAGGTCAACCCGGATCTTTATTAAATGATGATCAATTATATAACGTAGTAGTTACTGCTCACGGATTCATTATAATTTTTTTCATAGTTATACCTATTATAATTGGAGGATTTGGTAACTGGTTAGTTCCCTTAATATTAGGTGCTCCAGATATAGCATTCCCACGTATAAACAATATAAGATTCTGACTACTTCCTCCATCCTTAACTCTTTTATTAGCTTCATCTGCTGTAGAAAGAGGAGCCGGAACAGGTTGAACAGTTTATCCCCCTTTATCTAGGAATTTATCCCATGCTGGTCCTTCAGTTGATCTAGCAATTTTCTCACTCCA…	Todarodes pacificus	Not mislabeled
MOBIL6983-18	Ambrose University	March 5 2018	2018	T&T	Grocery	Ever Rich Seafood Mix - Shrimp	$5.99/pk	GACATTATATTTCATCTTTGGAGCTTGGGCTGGAATAGTAGGAACTGCTCTTAGATTAATATCCCGAGCTGAACTAGGACAACCAGGAAGTCTTATTGGAGATGACCAAATCTATAATGTAGTAGTCACTGCTCACGCTTTCGTAATAATTTTCTTTATAGTTATACCCATTATAATTGGAGGATTTGGAAACTGATTAGTACCATTGATATTAGGAGCTCCTGACATGGCCTTCCCACGAATAAATAACATGAGATTCTGATTACTTCCCCCTTCTTTAACCCTTCTCCTCTCTAGCGGTATAGTAGAAAGAGGAGTAGGGACGGGATGAACAGTTTACCCTCCCCTCTCAGCCAGAATTGCTCACGCGGGGGCTGCTGTAGATATAGGAATCTTCTC…	Parapenaeus longipes	Not mislabeled
MOBIL6984-18	Ambrose University	March 5 2018	2018	T&T	Grocery	Ever Rich Seafood Mix - Cooked Mussels	$5.99/pk	TACCCTTTATCTCTATAGAGGGGTATGAGGAGGTTTATTTGGGGCAAGGCTAAGTTTAATAATCCGTATACAACTTGGTCACCCTGGGGCCGTATTCCTCAAAAGAGACTGGTTTTTTAATGTAGTGGTTACAACACATGCTTTAGTGATGATTTTTTTTGCTGTAATACCAATCTTAATCGGGGCTTTTGGCAATTGGCTTATTCCTTTATTGGTAGGAGGTAAGGATATAATTTACCCTCGGATAAATAATTTGAGATATTGACTGTCTCCAAACGCATTGTACTTACTCATACTATCTTTTAGGACAGATAAAGGGGTGGGCGCTGGATGGACTGTATACCCTCCATTGTCTAGATACCCCTATCATAGAGGGCCAAGAATAGACGTCCTTATTGT…	Mytilus galloprovincialis	Not mislabeled
MOBIL6986-18	Ambrose University	March 5 2018	2018	Haru	Sushi	SHRIMP	$5.99/3 pc	AACATTATACTTTATCTTCGGGGCTTGAGCTGGAATAGTAGGTACCGCTCTTAGACTTATTATCCGAGCTGAATTAGGTCAACCTGGGAGCCTCATTGGGGATGATCAGATTTATAACGTAGTTGTCACAGCTCACGCTTTTGTAATAATTTTTTTTATAGTTATACCAATTATAATTGGAGGATTTGGTAATTGACTAGTACCTTTAATGTTAGGTGCCCCAGATATAGCCTTCCCTCGAATGAATAATATAAGCTTCTGGTTATTACCTCCTTCTCTTACATTGCTTTTATCAAGAGGAATGGTTGAAAGAGGTGTCGGAACCGGATGAACGGTATACCCTCCTTTATCTGCCAGTATTGCTCACGCTGGAGCTTCAGTAGATCTTGGAATTTTCTC…	Penaeus vannamei (100%), Litopenaeus vannamei (99.84%) (synonym)	Not mislabeled
MOBIL6987-18	Ambrose University	March 5 2018	2018	Haru	Sushi	SNOW CRAB	$5.99/3 pc	TACATTATATTTCATTTTTGGAGCATGAGCCGGAATAGTAGGTACATCTCTTAGATTAATTATTCGTGCTGAACTTGGTCAACCAGGTACATTAATTGGGAATGATCAAATTTATAATGTAGTAGTTACCGCGCATGCTTTTGTAATAATTTTTTTTATGGTTATGCCTATTATAATTGGGGGGTTTGGTAATTGACTTGTACCATTGATGTTAGGAGCCCCTGATATAGCTTTCCCTCGTATAAACAATATAAGATTCTGATTACTACCTCCTTCCTTAACTCTCCTTCTTATAAGTGGTATAGTAGAAAGAGGAGTTGGCACTGGTTGAACTGTCTACCCCCCTCTTGCAGCTGCGATTGCTCACGCAGGGGCATCTGTTGACATGGGTATTTTTTC…	Chaceon quinquedens (100%), Chaceon chuni (98.54%)	Product substitution
MOBIL6988-18	Ambrose University	March 5 2018	2018	Haru	Sushi	SCALLOP	$5.99/3 pc	TATTATGATAATTTTTTTTTTTGTTATGCCTGTTTTAATTGGGGGGTTTGGGAATTGGCTGCTCCCTTTGCTTTTAGGGGCTATTGATATAAGGTTTCCTCGTGTGAATGCCTTTAGGTTTTGGTTGGTGCCTCCTGCTCTTTATATGGTAGTGTCTTCTTCTTTTATGGACGGGCTAAGAGGAACTGGGTGGACTATGTACCCTCCGCTCTCTAGAACCCCGTACCACGGGGGTATTAGAACGGACATGGTTATTTTAGGGCTGCATTTGGCTGGGGTAAGGTCTTCTGCTGCTTCTATTAATTATTTAGTTACTTTTTTAAATGTTCGGGGCCTTGCTTATAAGGCGGAGTTTGCTCCTCCTTTTGCGTGGGCTTTGACTGTGACTAGGTTTTTGTT…	Placopecten magellanicus	Not mislabeled
MOBIL8881-18	Ambrose University	Oct 2 2018	2018	Co-op	Grocery	Spicy roll-shrimp	8.49	ATTATACTTTATCTTCGGGGCTTGAGCTGGAATAGTAGGTACCGCTCTTAGACTTATTATCCGAGCTGAATTAGGTCAACCTGGGAGCCTCATTGGGGATGATCAAATTTATAACGTAGTTGTCACAGCTCACGCTTTTGTAATAATTTTTTTTATAGTTATACCAATTATAATTGGAGGATTTGGTAATTGACTAGTACCTTTAATGTTAGGTGCCCCAGATATAGCCTTCCCTCGAATGAATAATATAAGCTTCTGGTTATTACCTCCTTCTCTTACATTGCTTTTATCAAGAGGAATGGTTGAAAGAGGTGTCGGAACCGGATGAACGGTATACCCTCCTTTATCTGCCAGTATTGCTCACGCTGGAGCTTCAGTAGATCTTGGAATTTTCTCTCT…	Penaeus vannamei (100%), Litopenaeus vannamei (100%) (synonym)	Not mislabeled
MOBIL9127-19	University of Calgary	Jan 28 2019	2019	Co-Op, Calgary	Grocery	Uncooked pacific white shrimp	12.99	GTAGTTGTCACAGCTCACGCCTTTGTAATAATTTTTTTTATAGTTATACCAATTATAATTGGAGGATTTGGTAATTGACTAGTACCTTTAATGTTAGGTGCCCCAGATATAGCCTTCCCTCGAATGAATAATATAAGCTTCTGGTTATTACCTCCTTCTCTTACATTGCTTTTATCAAGAGGAATGGTTGAAAGAGGTGTCGGAACCGGATGAACGGTATACCCTCCTTTATCTGCCAGTATTGCTCACGCTGGAGCTTCAGTAGATCTTGGAATTTTCTCTCTTCACTTAGCTGGAGTATCTTCTATTCTGGGAGCAGTAAACTTTATAACAACTGTAATCAATATACGATCTACAGGAATAACTATAGACCGTATACCTCTATTTGTATGAGCAGTA…	Penaeus vannamei (100%), Litopenaeus vannamei (100%) (synonym)	Not mislabeled
MOBIL9128-19	University of Calgary	Jan 28 2019	2019	Sobeys, Calgary	Grocery	Frozen whole baby cuttlefish	4.99	AACATTATATTTTATTTTCGGTATTTGATCAGGTCTACTAGGTACTTCATTAAGTTTAATAATTCGAAGAGAACTAGGAAAACCAGGTACTCTTTTAAATGATGATCAATTATATAATGTTGTAGTAACCGCCCACGGTTTTATTATAATTTTCTTTTTAGTTATACCTATTATAATTGGTGGATTTGGTAACTGGCTAGTTCCCTTAATATTAGGAGCACCAGACATAGCCTTCCCTCGAATAAATAATATAAGTTTTTGATTATTACCTCCATCCTTAACTCTTTTATTATCATCCTCAGCTGTAGAAAGAGGGGCTGGTACAGGATGAACAGTATATCCTCCCTTATCTAGTAATTTATCACATGCAGGCCCATCTGTAGATTTAGCTATTTTTTC…	Sepiella inermis	Product substitution
MOBIL9129-19	University of Calgary	Jan 28 2019	2019	Real Canadian Superstore, Calgary	Grocery	Atlantic scallop	12.57	TAATTTTTTTTTTTGTTATGCCTGTTTTAATTGGGGGGTTTGGGAATTGGCTGCTCCCTTTGCTTTTAGGGGCTATTGATATAAGGTTTCCTCGTGTGAATGCCTTTAGGTTTTGGTTGGTGCCTCCTGCTCTTTATATGGTAGTGTCTTCTTCTTTTATGGACGGGCTAAGAGGAACTGGGTGGACTATGTACCCTCCGCTCTCTAGAACCCCGTACCACGGGGGTATTAGAACGGACATGGTTATTTTAGGGCTGCATTTGGCTGGGGTAAGGTCTTCTGCTGCTTCTATTAATTATTTAGTTACTTTTTTAAATGTTCGGGGCCTTGCTTATAAGGCGGAGTTTGCTCCTCCTTTTGCGTGGGCTTTGACTGTGACTAGGTTTTTGTTGTTAATTT…	Placopecten magellanicus	Not mislabeled
MOBIL9131-19	University of Calgary	Jan 25 2019	2019	T&T Supermarket	Grocery	Vietnam Premium Black tiger shrimp	12.99	GAATAAATAATATAAGTTTCTGACTTTTACCCCCTTCGCTAACTTTACTTTTATCTAGAGGTATAGTCGAAAGAGGAGTGGGAACTGGATGAACAGTATACCCTC	Penaeus monodon	Not mislabeled
MOBIL9132-19	University of Calgary	Jan 29 2019	2019	Safeway, Calgary	Grocery	Clam	0	TACATTATATTTCATTTTTTTCAATTTGNGCTGGTCTTATGGGGACTGCTTTTAGTGTTATTATTCGTATAGAGTTGGCTATGCCGGGGAAAATGTTAGATGATGGTCAGCTTTACAATTTAGTTGTAACTGCTCATGGATTAGTTATGATTTTTTTCTTAGTAATACCAATAATAATCGGTGGGTTTGGTAATTGGTTGATTCCATTAATATTAAAAATACCTGATATAGCATTTCCTCGAATAAATAATTTAAGTTTTTGGCTACTTCCTGTATCAATATTATTATTATTAGGGTCTGCATATGTGGATGGTGGGGCTGGTACTGGTTGAACAGTGTACCNTCCGTTGTCGTCAATTGGGTTCCATTCAGGTTGTGCTGTGGATTATGTAATTTTTT…	Venerupis philippinarum (100%), Ruditapes philippinarum (99.82%)	Not mislabeled
MOBIL9133-19	University of Calgary	Jan 30 2019	2019	Co-Op, Calgary	Grocery	Wild crab	15.99	TTATTATTCGAGCAGAACTAGGTCAACCTGGTACTCTTATTGGTAATGACCAAATTTACAATGTTGTAGTTACAGCTCATGCTTTTGTAATAATTTTCTTTATAGTTATACCAATTATAATTGGGGGATTTGGTAACTGACTAGTACCATTAATGTTAGGAGCCCCTGACATGGCTTTTCCTCGTATAAACAACATAAGATTTTGACTTCTCCCCCCTTCTCTAACTTTACTTCTTATAAGAGGTATAGTGGAAAGAGGTGTTGGTACAGGTTGAACCGTCTATCCTCCTCTTTCAGCAGCCATCGCTCACGCAGGAGCTTCTGTAGATCTAGGTATTTTCTCTTTACATCTGGCAGGTGTTTCCTCTATTTTAGGTGCAGTAAATTTCATGACCACCG…	Portunus pelagicus	Not mislabeled
MOBIL9134-19	University of Calgary	Jan 26 2019	2019	Lucky Supermarket, Calgary	Grocery	Frozen whole cleaned baby octopus	4.39	TTTAGGTACTTCACTAAGCCTAATAATTCGAACAGAATTAGGACAACCAGGATCTTTACTAAATGACGACCAACTATATAACGTAATTGTGACAGCCCATGCATTTGTAATAATTTTTTTTCTTGTTATACCCGTAATAATTGGAGGATTTGGAAATTGATTAGTTCCTTTAATATTAGGTGCCCCAGATATAGCCTTTCCCCGTATAAACAATATAAGATTCTGATTGCTACCCCCATCTTTAACCCTTCTTCTTTCCTCCGCTGCAGTAGAAAGGGGTGTTGGTACTGGATGAACAGTTTACCCCCCTTTATCAAGAAACTTAGCACATATAGGACCCTCCGTTGATCTAGCAATTTTCTCCCTTCACTTAGCAGGTATTTCATCAATTTTAGGAGC…	Amphioctopus cf. neglectus NK-2008 (100%), Amphioctopus cf. neglectus RX-2020 (99.81%)	Product substitution
MOBIL9135-19	University of Calgary	Jan 27 2019	2019	Kinjo Sushi and Grill, Calgary	Sushi	lobster	12.99	GAATTAGGTCAACCAGGCAGATTTATCGGAGACGATCAAATCTACAACGTAGTAGTAACCGCTCACGCCTTTATTATGATTTTCTTCATGGTTATGCCCATTATAATCGGAGGGTTTGGAAATTGATTAGTCCCTATTATACTAGGAGCTCCCGATATAGCTTTCCCCCGAATGAATAACATGAGATTTTGACTTCTTCCCCCATCGCTAACGCTTCTTCTGGCTGGAGGAGCCGTAGAAAGAGGAGCTGGAACCGGTTGAACAGTTTATCCGCCTCTTTCGGCGGGAGTGGCACACGCTGGTGCGTCAGTGGACTTAAGTATCTTTTCACTACACCTAGCAGGTGTTTCATCCATTCTTGGAGCCGTCAACTTTATTACTACCGTCATCAATATACGG…	Panulirus argus	Product substitution
MOBIL9138-19	University of Calgary	Feb 05 2019	2019	Real Canadian Superstore, Calgary	Grocery	Pacific White Shrimp	4.4	GAGCTGAATTAGGTCAACCTGGGAGCCTCATTGGGGATGATCAAATTTATAACGTAGTTGTCACAGCTCACGCCTTTGTAATAATTTTTTTTATAGTTATACCAATTATAATTGGAGGATTTGGTAATTGACTAGTACCTTTAATGTTAGGTGCCCCAGATATAGCCTTCCCTCGAATGAATAATATAAGCTTCTGGTTATTACCTCCTTCTCTTACATTGCTTTTATCAAGAGGAATGGTTGAAAGAGGTGTCGGAACCGGATGAACGGTATACCCTCCTTTATCTGCCAGTATTGCTCACGCTGGAGCTTCAGTAGATCTTGGAATTTTCTCTCTTCACTTAGCTGGAGTATCTTCTATTCTGGGAGCAGTAAACTTTATAACAACTGTAATCAATA…	Penaeus vannamei (100%), Litopenaeus vannamei (99.83%) (synonym)	Not mislabeled
MOBIL9139-19	University of Calgary	Dec 15 2018	2019	Save On Foods, Calgary	Grocery	mix(squid/octopus/shrimp/mussels)	10.63	TACCTTATATTTTATCTTTGGTATCTGGGCAGGACTATTAGGTACATCATTAAGATTAATGATTCGTACCGAATTAGGTCAACCCGGATCTTTATTAAATGATGATCAATTATATAACGTAGTAGTTACTGCTCACGGATTCATTATAATTTTTTTCATAGTTATACCTATTATAATTGGAGGATTTGGTAACTGGTTAGTTCCCTTAATATTAGGTGCTCCAGATATAGCATTCCCACGTATAAANAATATAAGATTCTGACTACTTCCTCCATCCTTAACTCTTTTATTAGCTTCATCTGCTGTAGAAAGAGGAGCCGGAACAGGTTGAACAGTTTATCCCCCTTTATCTAGGAATTTATCCCATGCTGGTCCTTCAGTTGATCTAGCAATTTTCTC…	Todarodes pacificus	Not mislabeled
MOBIL9140-19	University of Calgary	Jan 30 2019	2019	Costco	Grocery	Tail on raw shrimp	19.99	AACGTAGTTGTCACAGCTCACGCTTTTGTAATAATTTTTTTTATAGTTATACCAATTATAATTGGAGGATTTGGTAATTGACTAGTACCTTTAATGTTAGGTGCCCCAGATATAGCCTTCCCTCGAATGAATAATATAAGCTTCTGGTTATTACCTCCTTCTCTTACATTGCTTTTATCAAGAGGAATGGTTGAAAGAGGTGTCGGAACCGGATGAACGGTATACCCTCCTTTATCTGCCAGTATTGCTCACGCTGGAGCTTCAGTAGATCTTGGAATTTTCTCTCTTCACTTAGCTGGAGTATCTTCTATTCTGGGAGCAGTAAACTTTATAACAACTGTAATCAATATACGATCTACAGGAATAACTATAGACCGTATACCTCTATTTGTATGAGCA…	Penaeus vannamei (100%), Litopenaeus vannamei (100%) (synonym)	Not mislabeled
MOBIL9141-19	University of Calgary	Feb 3 2019	2019	Sunterra Market, Calgary	Grocery	clam	0	ATGCCGGGGAAAATGTTAGATGATGGTCAGCTTTACAATTTAGTTGTAACTGCTCATGGATTAGTTATGATTTTTTTCTTAGTAATACCAATAATAATCGGTGGGTTTGGTAATTGGTTGATTCCATTAATATTAAAAATACCTGATATAGCATTTCCTCGAATAAATAATTTAAGTTTTTGGTTACTTCCTGTATCAATATTATTATTATTAGGGTCTGCATATGTGGATGGTGGGGCTGGTACTGGTTGAACAGTGTACCCTCCGTTGTCGTCAATTGGGTTCCATTCAGGTTGTGCTGTGGATTATGTAATTTTTTCTCTCCACGTAGGTGGTGTCTCTTCAATTTTAGCTTCTATTAATTTTGTAATTACTACATCATTGATGCGAACAGGTGTC…	Ruditapes philippinarum (100%), Venerupis philippinarum (100%) (synonym)	Not mislabeled
MOBIL9142-19	University of Calgary	Feb 2 2019	2019	Real Canadian Superstore, Calgary	Grocery	Malpeque Oyster	1.98	CGATGTATTGAAATGTCGATCAGTAAGGAGCATAGTAAGCCCGCCAGCTAGAACAGGTAGCGTGGTAAGCAGCAGGAATGATGTCACTTTAATTGACCAAGGGAAAAGTGCTAATATGTGACCCCCAACAGATCGCATGTTTCTAATGGTTACTATAAAATTAATAGACCTGAAAATAGACCTAATACCTGCTAAGTGTAACCTTAAAATGGCAAAATCCATGCAAACTCCATGGTAAGAAAAAGTTGACAGCGGAGGGTAAATGGTTCATCCTGACCCAACTCCTCTCTCAGACATATTTGACATCAATATTAGCAGCAATGACCCTGGCAATACTCAGAATCTAAAAGCATTTAATCGAGGGAACTGCATGTCTGCCACTTCAAGTATAAGCGGAAT…	Crassostrea virginica	Semantic mislabeling
MOBIL9143-19	University of Calgary	Feb 3 2019	2019	Safeway	Grocery	Mussels Atlantic Fresh	0.18	TGTGGTTGTTACAACACACGCCTTAATAATAATTTTCTTTGCTGTAATACCGATTCTAATCGGAGCTTTTGGTAATTGGCTGATTCCTCTATTAGTAGGTGGTAAAGATATAATTTATCCACGGATAAATAATTTGAGTTATTGGTTATCTCCTAATGCGCTATATTTACTTATATTATCTTTTAGAACGGATAAAGGGGTAGGTGCTGGATGGACTATTTACCCGCCATTGTCTGTATATCCTTATCATAGTGGGCCGAGGATAGATGTTCTTATTGTGTCCTTGCATTTAGCTGGGTTAAGTTCTTTGGTGGGTGCTATTAATTTTGCCAGTACTAACAAAAACATACCAGTTTTAGAGATAAAAGGAGAACGAGCTGAGCTTTATGTCCTAAGGAT…	Mytilus galloprovincialis (99.74%), Mytilus sp. 2 (99.02%), Mytilus edulis (99.02%), Mytilus trossulus (98.81%)	Semantic mislabeling
MOBIL9144-19	University of Calgary	Feb 7 2019	2019	Safeway, Calgary	Grocery	Lobster tail	6.99	CGTGCTGAATTAGGTCAACCAGGAAGCCTCATTGGTGACGATCAAATCTACAATGTAGTTGTAACCGCCCACGCTTTTGTTATAATTTTCTTCATAGTTATACCCATTATAATTGGAGGCTTTGGAAACTGACTTGTACCACTTATACTAGGAGCTCCAGATATAGCATTTCCCCGTATGAACAATATAAGATTTTGACTTCTTCCTTTTTCTTTAACATTATTATTAACAAGAGGAATAGTAGAAAGTGGAGTAGGAACTGGATGAACTGTCTACCCCCCACTCTCAGCGGCAATTGCTCACGCAGGTGCTTCCGTTGACTTAGGAATTTTCTCGCTTCATCTGGCTGGGGTCTCATCTATTTTGGGTGCAGTAAATTTTATGACAACTGCCATTAAT…	Homarus americanus	Not mislabeled
MOBIL9145-19	University of Calgary	Feb 2 2019	2019	T&T, Calgary	Grocery	cherrystone clam	2.89	AACTTTGTATTTTATTTTTTCTATTTGGGCAGGTCTAATGGGTACTGCTTTTAGTGTTATTATTCGTATAGAACTGGCTATACCTGGAAAGATGTTGGATGATGGGCAGTTGTATAATTTAATTGTTACTGCACATGGTTTAGTAATGATTTTTTTTCTAGTTATGCCAATAATGATTGGAGGTTTTGGGAATTGGTTGGTTCCTTTAATATTAACTATGCCTGATATGGCGTTTCCTCGAATGAATAATCTGAGTTTCTGGTTGTTACCAGTGTCAATGCTTTTGTTATTAGGTTCTGCTTATGTAGATGGGGGAGCTGGAACAGGGTGAACTATTTATCCTCCGCTGTCTAGGGCTCTTTCTCATTCTGGTAGCTCAATGGATTATGTTATTTTTTC…	Mercenaria mercenaria	Semantic mislabeling

## Sheet: vertebrates
BOLD ID	Full BOLD	Collected By	Collection Date	Year	Vendor	Vendor Type	Market Name	Price	DNA Barcode	Barcode Identity (as of 2024)	Mislabeling Type
MOBIL1701-16	BOLD-0DLSTKEB6	Ambrose University	Oct 5 2016	2016	Sushi Ichiban	Sushi	Red Tuna - Ahi Tuna	2.95	CACCCTCTATCTAGTATTCGGTGCATGAGCTGGAATAGTTGGCACGGCCTTAAGCTTGCTCATCCGAGCTGAACTAAGCCAACCAGGTGCCCTTCTTGGGGACGACCAGATCTACAATGTAATCGTTACGGCCCATGCCTTCGTAATGATTTTCTTTATAGTAATACCAATTATGATTGGAGGATTTGGAAACTGACTTATTCCTCTAATGATCGGAGCCCCCGACATGGCATTCCCACGAATGAACAACATGAGCTTCTGACTCCTTCCCCCTTCTTTCCTTCTGCTCCTAGCTTCTTCAGGAGTTGAGGCTGGAGCCGGAACCGGTTGAACAGTCTACCCTCCCCTTGCCGGCAACCTAGCCCACGCAGGGGCATCAGTTGACCTAACTATTTTCTC…	Thunnus thynnus, T. orientalis	Product substitution
MOBIL1710-16	BOLD-0DHNROYM0	Ambrose University	Sept 29 2016	2016	McDonald's	Restaurant	Filet-O-Fish (from website - Alaska Pollock)	5.19	CACCCTTTATCTCGTATTTGGTGCCTGAGCCGGCATAGTCGGAACAGCCCTAAGCCTGCTCATTCGAGCAGAGCTAAGTCAACCTGGTGCACTTCTTGGTGATGATCAAATTTATAATGTGATCGTTACAGCGCACGCTTTCGTAATAATTTTCTTTATAGTAATACCACTAATAATTGGAGGCTTTGGAAACTGACTCATTCCTCTAATGATCGGTGCCCCAGATATAGCTTTCCCTCGAATAAATAACATAAGCTTCTGACTTCTTCCCCCATCTTTCCTGCTCCTTTTAGCATCCTCTGGTGTAGAAGCTGGGGCTGGAACAGGCTGAACTGTCTATCCACCTTTAGCCGGAAACCTCGCTCATGCTGGGGCATCTGTTGATCTCACTATTTTCTC…	Gadus chalcogrammus	Not mislabeled
MOBIL1681-16	BOLD-0DHIJ21R2	Ambrose University	Oct 1 2016	2016	Costco	Grocery	Wild Alaskan Salmon Oil	23.99/320 capsules	CTTTCTACTACTTGCCTCTTCTGGGGTAGAAGCTGGTGCCGGAACCGGATGAACAGTGTACCCGCCCCTGTCCGGTAATNTAGCCCACGCAGGAGCATCAGTCGATCTGACAATTTTTTCACTTCACCTAGCAGGTATTTCCTCAATCCTTGGGGCAATTAATTTTATCACCACAATTATTAATATGAAGCCNCCGGCCATCTCTCAATACCAGACACCCCTATTTGTATGAGCCGTTCTAATTACCGCTGTTCTTCTCCTTCTCTCCCTACCAGTTCTCGCTGCCGGCATCACAATGCNCCTTCCGACCGAAATCTTAA	Sebastes serranoides, S. flavidus, S. sp., S. melanops, S. variabilis	Product substitution
MOBIL1688-16	BOLD-0DLAP5N73	Ambrose University	Oct 3 2016	2016	Strathcona Sobey's	Grocery	Fresh Atlantic Salmon Skinless Fillet Boned	35.78/kg	CACCCTCTATTTAGTATTTGGTGCCTGAGCCGGAATAGTCGGCACCGCCCTAAGTCTCTTGATTCGAGCAGAACTCAGCCAGCCTGGCGCCCTTCTGGGAGATGACCAAATTTATAACGTAATTGTTACAGCCCATGCCTTCGTCATAATTTTCTTTATAGTCATACCGATTATGATCGGCGGCTTTGGAAACTGATTAATTCCTCTTATAATCGGGGCCCCCGACATAGCATTCCCCCGAATGAATAACATAAGTTTTTGACTTCTCCCTCCCTCCTTTCTTCTCCTCCTGGCCTCATCTGGAGTTGAAGCCGGCGCTGGCACCGGATGAACAGTCTACCCCCCTCTAGCAGGTAATCTTGCCCACGCAGGAGCTTCCGTTGACTTAACTATTTTTTC…	Salmo salar	Not mislabeled
MOBIL1704-16	BOLD-0DHN1F9G8	Ambrose University	Oct 5 2016	2016	Real Canadian Superstore	Grocery	Fresh farmed Atlantic salmon fillet skinless	31.90/kg	CACCCTCTATTTAGTATTTGGTGCCTGAGCCGGAATAGTCGGCACCGCCCTAAGTCTCTTGATTCGAGCAGAACTCAGCCAGCCTGGCGCCCTTCTGGGAGATGACCAAATTTATAACGTAATTGTTACAGCCCATGCCTTCGTCATAATTTTCTTTATAGTCATACCGATTATGATCGGCGGCTTTGGAAACTGATTAATTCCTCTTATAATCGGGGCCCCCGACATAGCATTCCCCCGAATGAATAACATAAGTTTTTGACTTCTCCCTCCCTCCTTTCTTCTCCTCCTGGCCTCATCTGGAGTTGAAGCCGGCGCTGGCACCGGATGAACAGTCTACCCCCCTCTAGCAGGTAATCTTGCCCACGCAGGAGCTTCCGTTGACTTAACTATTTTTTC…	Salmo salar	Not mislabeled
MOBIL1702-16	BOLD-0DLU6X7N0	Ambrose University	Oct 5 2016	2016	Safeway	Grocery	Smkd Atlantic Salmon Candy Nug	20.37/lb	GTTACAGCCCATGCNTTCGTCATAATTTTCTTTATAGTCATACCGATTATGATCGGCGGCTTTGGAAANTGATTAATTCCTCTTATAATCGGGGCCCCCGACATAGCATTCCCCCGAATGAATAACATAAGTTTTTGACTTCTCCCTCCCTCCTTTCTTCTCCTCNTGGCCTCATCTGGAGTTGAAGCCGGCGCTGGCACCGGATGAACAGTCTACCCCCCTCTAGCAGGTAATCTTGCCCACGCAGGAGCTTCCGTTGACTTAACTATTTTTTCCCTCCATTTGGCTGGTATTTCTTCAATTCTTGGGGCCATTAATTTTATTACAACCATTATTAATATAAAACCCCCAGCTATCTCTCAGTATCAAACCCCACTTTTTGTTTGAGCTGTATTAGTC…	Salmo salar	Not mislabeled
MOBIL1705-16	BOLD-0DHMUVPJ0	Ambrose University	Sept 28 2016	2016	Superstore	Grocery	Fresh farmed Atlantic salmon fillet skinless	31.90/kg	TGATTCGAGCAGAACTCAGCCAGCCTGGCGCCCTTCTGGGAGATGACCAAATTTATAACGTAATTGTTACAGCCCATGCCTTCGTCATAATTTTCTTTATAGTCATACCGATTATGATCGGCGGCTTTGGAAACTGATTAATTCCTCTTATAATCGGGGCCCCCGACATAGCATTCCCCCGAATGAATAACATAAGTTTTTGACTTCTCCCTCCCTCCTTTCTTCTCCTCCTGGCCTCATCTGGAGTTGAAGCCGGCGCTGGCACCGGATGAACAGTCTACCCCCCTCTAGCAGGTAATCTTGCCCACGCAGGAGCTTCCGTTGACTTAACTATTTTTTCCCTCCATTTGGCTGGTATTTCTTCAATTCTTGGGGCCATTAATTTTATTACAACCATTA…	Salmo salar	Not mislabeled
MOBIL1695-16	BOLD-0DHLEQC17	Ambrose University	Sept 29 2016	2016	Sakana Grill	Sushi	Sake (Atlantic) - Salmon (raw)	1.95	CACCCTCTATTTAGTATTTGGTGCCTGAGCCGGAATAGTCGGCACCGCCCTAAGTCTCTTGATTCGAGCAGAACTCAGCCAGCCTGGCGCCCTTCTGGGAGATGACCAAATTTATAACGTAATTGTTACAGCCCATGCCTTCGTCATAATTTTCTTTATAGTCATACCGATTATGATCGGCGGCTTTGGAAACTGATTAATTCCTCTTATAATCGGGGCCCCCGACATAGCATTCCCCCGAATGAATAACATAAGTTTTTGACTTCTCCCTCCCTCCTTTCTTCTCCTCCTGGCCTCATCTGGAGTTGAAGCCGGCGCTGGCACCGGATGAACAGTCTACCCCCCTCTAGCAGGTAATCTTGCCCACGCAGGAGCTTCCGTTGACTTAACTATTTTTTC…	Salmo salar	Not mislabeled
MOBIL1700-16	BOLD-0DLU9PR61	Ambrose University	Oct 3 2016	2016	Superstore	Grocery	ASC Basa Fillets	14.90/kg	CACCCTCTACCTAGTATTTGGTGCCTGAGCAGGAATAGTTGGTACGGCCCTCAGCCTCCTAATTCGGGCAGAGCTAGCCCAACCCGGCGCCCTTCTAGGCGACGACCAAATTTATAATGTTATTGTCACTGCCCATGCCTTCGTAATAATTTTCTTTATAGTAATACCAATTATAATTGGAGGCTTTGGAAACTGACTTGTCCCCTTAATAATTGGAGCGCCTGATATGGCATTCCCTCGAATAAATAATATGAGTTTTTGATTACTTCCGCCTTCCTTCCTACTATTGCTTGCCTCCTCTGGAGTAGAAGCAGGGGCAGGAACAGGATGAACTGTATATCCACCCCTTGCTGGAAACCTCGCACATGCCGGGGCTTCTGTAGATTTAACTATTTTCTC…	Pangasianodon hypophthalmus, Pangasius krempfi, P. bocourti	Not mislabeled
MOBIL1694-16	BOLD-0DLIC74H3	Ambrose University	Sept 25 2016	2016	Kinjo Sushi and Grill	Sushi	BF Negi Toro	2.75/2 pc	CACCCTCTATCTAGTATTCGGTGCATGAGCTGGAATAGTTGGCACGGCCTTAAGCTTGCTCATCCGAGCTGAACTAAGCCAACCAGGTGCCCTTCTTGGGGACGACCAGATCTACAATGTAATCGTTACGGCCCATGCCTTCGTAATGATTTTCTTTATAGTAATACCAATTATGATTGGAGGATTTGGAAACTGACTTATTCCTCTAATGATCGGAGCCCCCGACATGGCATTCCCACGAATGAACAACATGAGCTTCTGACTCCTTCCTCCCTCTTTCCTTCTGCTCCTAGCTTCTTCAGGAGTTGAGGCTGGGGCCGGAACCGGTTGAACAGTCTACCCTCCCCTTGCCGGCAACCTAGCCCACGCAGGGGCATCAGTTGACCTAACTATTTTCTC…	Thunnus orientalis, T. thynnus, T. maccoyii, T. alalunga, T. obesus	Semantic mislabeling
MOBIL1692-16	BOLD-0DLHRQ7W8	Ambrose University	Sept 25 2016	2016	Kinjo Sushi and Grill	Sushi	Unagi (BBQ eel)	5.50/2 pc	TACCCTATATCTCGTATTTGGTGCCTGAGCCGGAATAGTCGGCACTGCACTGAGCCTTCTAATCCGTGCCGAATTAAGTCAACCAGGCGCCCTTCTTGGAGATGACCAAATTTACAATGTCATCGTCACAGCGCATGCCTTTGTAATGATTTTCTTTATAGTAATGCCAGTAATAATTGGAGGATTTGGCAACTGACTTGTGCCATTAATAATCGGCGCCCCAGACATAGCATTCCCCCGAATAAATAATATAAGCTTCTGACTTTTACCCCCATCATTTCTTCTACTACTAGCCTCCTCTGGAGTAGAGGCCGGAGCTGGTACAGGCTGAACTGTATATCCACCCCTGGCTGGAAACTTAGCCCACGCTGGGGCATCTGTTGACCTGACAATTTTCTC…	Anguilla anguilla	Product substitution
MOBIL1697-16	BOLD-0DHKUBEL5	Ambrose University	Sept 29 2016	2016	Sakana Grill	Sushi	Unagi - Fresh water eel (BBQ)	2.3	TACCCTATATCTCGTATTTGGTGCCTGAGCCGGAATAGTCGGCACTGCACTGAGCCTTCTAATCCGTGCCGAATTAAGTCAACCAGGCGCCCTTCTTGGAGATGACCAAATTTACAATGTCATCGTCACAGCGCATGCCTTTGTAATGATTTTCTTTATAGTAATGCCAGTAATAATTGGAGGATTTGGCAACTGACTTGTACCATTAATAATCGGCGCCCCAGACATAGCATTCCCCCGAATAAATAATATAAGCTTCTGACTTTTACCCCCATCATTTCTTCTACTACTAGCCTCCTCTGGAGTAGAGGCCGGAGCTGGTACAGGCTGAACTGTATATCCACCCCTGGCTGGAAACTTAGCCCACGCCGGGGCATCTGTTGACCTGACAATTTTCTC…	Anguilla anguilla	Product substitution
MOBIL1687-16	BOLD-0DLABI2F8	Ambrose University	Oct 3 2016	2016	Strathcona Sobey's	Grocery	Fresh Halibut Fillets	5.99/100 g	CACCCTCTATCTCGTATTTGGTGCCTGAGCCGGAATAGTGGGGACAGGCCTAAGTCTGCTTATTCGGGCAGAACTAAGCCAACCCGGGGCTCTCCTGGGAGACGACCAAATTTATAATGTAATCGTCACCGCACACGCCTTTGTAATAATCTTTTTTATAGTAATACCCATTATGATTGGGGGGTTCGGAAACTGGCTTATTCCACTAATAATTGGGGCCCCAGATATGGCGTTCCCTCGAATGAATAACATGAGTTTCTGACTTCTTCCCCCCTCCTTTCTCCTCCTCTTAGCCTCTTCAGGGGTTGAAGCCGGAGCAGGTACCGGATGAACCGTATACCCCCCACTAGCTGGCAATTTAGCCCACGCCGGGGCATCCGTAGACCTGACAATCTTCTC…	Hippoglossus stenolepis, H. hippoglossus	Not mislabeled
MOBIL1693-16	BOLD-0DLGPM4K0	Ambrose University	Sept 25 2016	2016	Kinjo Sushi and Grill	Sushi	Hamachi	5.50/2 pc	CACCCTCTATCTGGTATTCGGTGCCTGAGCCGGCATGGTCGGTACAGCTTTAAGTTTACTCATCCGAGCAGAACTTAGTCAACCCGGTGCTCTTCTGGGAGACGATCAAATTTATAACGTAATCGTTACAGCGCACGCGTTTGTAATAATTTTCTTTATAGTAATGCCAATTATGATTGGAGGGTTTGGGAACTGACTCATCCCCTTAATGATCGGGGCTCCCGATATAGCATTCCCCCGAATAAACAACATGAGCTTCTGACTCCTTCCCCCTTCATTCCTCCTACTTCTGGCCTCTTCAGGTGTTGAAGCCGGAGCTGGGACGGGTTGGACAGTCTACCCGCCCCTAGCCGGCAACCTTGCTCACGCGGGAGCATCCGTAGACTTAACAATTTTCTC…	Seriola quinqueradiata, Elagatis bipinnulata	Semantic mislabeling
MOBIL1685-16	BOLD-0DHMBNK99	Ambrose University	Oct 3 2016	2016	Original Joe's	Restaurant	North Atlantic Haddock (Fish and Chips)	7.5/extra pc, 16.00/plate	TCCTGCAATTTCACAATATCAAACACCCCTTTTTGTTTGAGCAGTCCTAATNACAGCTGTGCTTCTGCTATTATCTCTTCCCGTCTTAGCCGCCGGTATCACAATACTTTTAA	Melanogrammus aeglefinus	Semantic mislabeling
MOBIL1679-16	BOLD-0DHGUCV71	Ambrose University	Oct 12 2016	2016	Willow Park North Sea Fish Market	Market	Pacific cod	16.25/lb	CACCCTTTATCTCGTATTTGGTGCNTGAGCCGGCATAGTCGGAACAGCCCTAAGCCTACTCATTCGAGCAGAGCTAAGTCAACCTGGTGCACTCCTAGGTGATGATCAAATTTATAATGTGATCGTTACAGCGCACGCTTTCGTAATAATTTTCTTTATAGTAATACCACTAATAATTGGAGGCTTTGGGAACTGACTCATTCCTCTAATGATCGGTGCCCCCGATATAGCTTTCCCTCGAATAAATAACATAAGCTTCTGACTTCTCCCTCCATCTTTCCTGCTCCTTTTAGCATCCTCTGGTGTAGAAGCTGGAGCCGGAACAGGCTGAACTGTCTACCCACCTTTAGCCGGAAACCTCGCTCATGCTGGGGCATCTGTTGATCTCACTATTTTTTC…	Gadus macrocephalus, Gadus ogac, Boreogadus saida	Not mislabeled
MOBIL1682-16	BOLD-0DHI9UZ70	Ambrose University	Oct 12 2016	2016	Willow Park North Sea Fish Market	Market	Snapper Fillet Pacific	13.95/lb	CACCCTTTATCTAGTATTTGGTGCCTGAGCCGGTATAGTAGGCACAGCCCTCAGCCTACTCATTCGAGCAGAACTAAGCCAACCGGGCGCTCTCCTTGGAGACGACCAAATTTATAATGTAATCGTTACAGCACATGCCTTCGTAATGATTTTCTTTATAGTAATACCAATTATAATTGGAGGTTTTGGAAACTGATTAATTCCCCTAATGATTGGAGCCCCAGATATAGCATTTCCTCGTATAAATAACATAAGTTTCTGACTTCTACCCCCTTCTTTCCTACTACTACTTGCCTCTTCTGGAGTAGAAGCGGGTGCCGGAACCGGATGAACAGTGTACCCGCCCCTGTCCGGTAATTTAGCCCACGCAGGAGCATCAGTCGACCTGACAATCTTTTC…	Sebastes entomales, S. mystinus, S. hopkinsi, S. rosaceus, S. rufus	Not mislabeled
MOBIL1680-16	BOLD-0DHIMJFQ7	Ambrose University	Oct 12 2016	2016	Willow Park North Sea Fish Market	Market	Pickerel	24.50/lb	CACCCTTTATCTAGTATTTGGTGCTTGAGCCGGAATAGTGGGCACAGCTCTAAGCCTACTCATCCGAGCGGAACTAAGCCAACCCGGCGCTCTCCTTGGAGACGACCAAATTTATAACGTAATTGTTACGGCACATGCCTTTGTAATAATCTTCTTTATAGTAATACCCATTATGATTGGAGGTTTTGGGAATTGACTCATCCCACTCATAATTGGTGCCCCCGATATAGCATTCCCTCGAATAAATAACATAAGCTTTTGACTTCTGCCCCCCTCTTTCCTTCTCCTTCTTGCCTCCTCAGGGGTTGAGGCAGGAGCTGGTACCGGGTGGACTGTTTATCCCCCATTAGCTGGAAACCTGGCACACGCCGGGGCATCTGTCGACTTAACCATTTTTTC…	Sander vitreus	Not mislabeled
MOBIL1696-16	BOLD-0DHJNELS4	Ambrose University	Sept 29 2016	2016	Sakana Grill	Sushi	Tai - Red Snapper	1.8	CCCCGCCATCTCTCAATATCAAACACCCCTATTTGTATGGTCCGTTCTAATTACCGCAGTATTACTTCTTCTATCCCTACCCGTTCTTGCCGCCGGCATCACAATACTTCTCACAGACCGAAACCTAAACACAACCTTCTTTGATCCTGCCGGAGGAGGAGACCCC	Oreochromis sp., O. aureus, O. niloticus, O. aureus x niloticus, O. mossambicus, Tilapia zillii, three strains of O. sp.	Product substitution
MOBIL1707-16	BOLD-0DHPBCW20	Ambrose University	Oct 4 2016	2016	Edo Japan	Sushi	Spicy Salmon Roll	4.69/6 pc	CACCCTCTATTTAGTATTTGGTGCCTGAGCCGGGATAGTAGGCACCGCCCTGAGTCTACTGATTCGGGCGGAACTAAGCCAGCCGGGCGCTCTTCTGGGGGATGACCAAATCTATAACGTGATCGTCACAGCCCATGCCTTCGTTATGATTTTCTTTATAGTCATGCCAATTATAATCGGGGGCTTTGGAAACTGATTAATTCCCCTAATAATCGGAGCCCCTGATATGGCATTTCCTCGAATAAATAACATAAGCTTCTGACTCCTTCCTCCATCCTTTCTCCTCCTCCTGTCTTCATCAGGAGTTGAAGCCGGCGCGGGTACTGGATGAACAGTATACCCCCCTCTAGCCGGCAACCTCGCCCACGCAGGAGCCTCTGTTGATTTAACTATCTTCTC…	Oncorhynchus mykiss, sp.	Product substitution
MOBIL1684-16	BOLD-0DHLKURW4	Ambrose University	Oct 4 2016	2016	Ikea	Restaurant	Pulled Salmon Sandwich	4.99	CACCCTCTATTTAGTATTTGGTGCCTGAGCCGGAATAGTCGGCACCGCCCTAAGTCTCTTGATTCGAGCAGAACTCAGCCAGCCTGGCGCCCTTCTGGGAGATGACCAAATTTATAACGTAATTGTTACAGCCCATGCCTTCGTCATAATTTTCTTTATAGTCATACCGATTATGATCGGCGGCTTTGGAAACTGATTAATTCCTCTTATAATCGGGGCCCCCGACATAGCATTCCCCCGAATGAATAACATAAGTTTTTGACTTCTCCCTCCCTCCTTTCTTCTCCTCCTGGCCTCATCTGGAGTTGAAGCCGGCGCTGGCACCGGATGAACAGTCTACCCCCCTCTAGCAGGTAATCTTGCCCACGCAGGAGCTTCCGTTGACTTAACTATTTTTTC…	Salmo salar	Not mislabeled
MOBIL1686-16	BOLD-0DHMOB637	Ambrose University	Oct 4 2016	2016	Kinjo Sushi and Grill	Sushi	Salmon Roll	3.60/6 pc	CACCCTCTATTTAGTATTTGGTGCCTGAGCCGGAATAGTCGGCACCGCCCTAAGTCTCTTGATTCGAGCAGAACTCAGCCAGCCTGGCGCCCTTCTGGGAGATGACCAAATTTATAACGTAATTGTTACAGCCCATGCCTTCGTCATAATTTTCTTTATAGTCATACCGATTATGATCGGCGGCTTTGGAAACTGATTAATTCCTCTTATAATCGGGGCCCCCGACATAGCATTCCCCCGAATGAATAACATAAGTTTTTGACTTCTCCCTCCCTCCTTTCTTCTCCTCCTGGCCTCATCTGGAGTTGAAGCCGGCGCTGGCACCGGATGAACAGTCTACCCCCCTCTAGCAGGTAATCTTGCCCACGCAGGAGCTTCCGTTGACTTAACTATTTTTTC…	Salmo salar	Not mislabeled
MOBIL1709-16	BOLD-0DHOYRU85	Ambrose University	Oct 3 2016	2016	Haru Sushi Bar	Sushi	Tai (snapper)	2.29	CACCCTCTATCTAGTATTTGGTGCTTGAGCCGGAATAGTAGGAACTGCACTAAGCCTCCTAATTCGGGCAGAACTAAGCCAGCCCGGCTCTCTTCTCGGAGACGACCAAATCTATAATGTAATTGTTACAGCACATGCTTTCGTAATAATTTTCTTTATAGTAATACCAATTATGATTGGAGGCTTTGGAAACTGACTAGTACCCCTCATGATTGGTGCACCAGACATGGCCTTCCCTCGAATAAATAACATGAGCTTTTGACTTCTCCCCCCCTCATTTCTTCTTCTTCTCGCCTCATCTGGAGTCGAAGCAGGTGCCGGCACAGGATGGACTGTTTATCCCCCGCTCGCAGGCAATCTTGCCCACGCTGGACCTTCTGTTGACTTAACCATCTTCTC…	Oreochromis sp., O. niloticus, O. aureus, O. aureus x niloticus, O. mossambicus, 14 O. sp.	Product substitution
MOBIL1689-16	BOLD-0DLAJFNM4	Ambrose University	Oct 3 2016	2016	Strathcona Sobey's	Grocery	Fresh Snapper Fillets	24.90/kg	CCCGGCCATCTCTCAATACCAGACACCCCTATTTGTATGAGCCGTTCTAATTACCGCTGTTCTTCTCCTTCTCTCCCTACCAGTTCTCGCTGCCGGCATCACAATGCTCCTTACCGACCGAAATCTTAATACCACCTTCTTTGATCCGGCCGGAGGAGGGGATCCAATCC	Sebastes serranoides, S. flavidus, S. sp., S. melanops, S. variabilis, S. mystinus	Product substitution
MOBIL1706-16	BOLD-0DHNXM8K6	Ambrose University	Nov 4 2016	2016	Safeway	Grocery	Wild Sockeye Salmon Fillet	22.18/lb	CACCCTCTATTTAGTATTTGGTGCCTGAGCCGGGATAGTCGGCACCGCCCTAAGCCTACTGATTCGGGCAGAACTAAGCCAGCCAGGCGCTCTTCTAGGAGATGACCAGATCTATAACGTAATCGTCACAGCCCATGCCTTCGTTATGATTTTCTTTATAGTCATACCAATTATAATCGGAGGATTTGGAAACTGATTAATCCCTCTAATAATCGGAGCCCCCGATATGGCATTCCCACGAATAAATAACATAAGCTTCTGACTCCTCCCCCCCTCGTTTCTCCTCCTCCTATCTTCATCTGGAGTTGAAGCCGGCGCTGGTACCGGATGAACAGTTTATCCCCCTCTGGCCGGAAACCTTGCCCACGCGGGAGCCTCTGTTGACTTAACCATCTTCTC…	Oncorhynchus nerka	Not mislabeled
MOBIL1699-16	BOLD-0DLUIRA76	Ambrose University	Oct 3 2016	2016	Superstore	Grocery	Wild Sockeye Salmon Steaks	19.90/kg	CACCCTCTATTTAGTATTTGGTGCCTGAGCCGGGATAGTCGGCACCGCCCTAAGCCTACTGATTCGGGCAGAACTAAGCCAGCCAGGCGCTCTTCTAGGAGATGACCAGATCTATAACGTAATCGTCACAGCCCATGCCTTCGTTATGATTTTCTTTATAGTCATGCCAATTATAATCGGAGGATTTGGAAACTGATTAATCCCTCTAATAATCGGAGCCCCCGATATGGCATTCCCACGAATAAATAACATAAGCTTCTGACTCCTCCCCCCCTCGTTTCTCCTCCTCCTATCTTCATCTGGAGTTGAAGCCGGCGCTGGTACCGGATGAACAGTTTATCCCCCTCTGGCCGGAAACCTTGCCCACGCGGGAGCCTCTGTTGACTTAACCATCTTCTC…	Oncorhynchus nerka	Not mislabeled
MOBIL1703-16	BOLD-0DHNKB7J6	Ambrose University	Oct 4 2016	2016	Hot Stone Rice Bowl	Sushi	Wild Sockeye Salmon	2.95/piece	CACCCTCTATTTAGTATTTGGTGCCTGAGCCGGGATAGTCGGCACCGCCCTAAGCCTACTGATTCGGGCAGAACTAAGCCAGCCAGGCGCTCTTCTAGGAGATGACCAGATCTATAACGTAATCGTCACAGCCCATGCCTTCGTTATGATTTTCTTTATAGTCATGCCAATTATAATCGGAGGATTTGGAAACTGATTAATCCCTCTAATAATCGGAGCCCCCGATATGGCATTCCCACGAATAAATAACATAAGCTTCTGACTCCTCCCCCCCTCGTTTCTCCTCCTCCTATCTTCATCTGGAGTTGAAGCCGGCGCTGGTACCGGATGAACAGTTTATCCCCCTCTGGCCGGAAACCTTGCCCACGCGGGAGCCTCTGTTGACTTAACCATCTTCTC…	Oncorhynchus nerka	Not mislabeled
MOBIL1708-16	BOLD-0DHPA8F63	Ambrose University	Oct 4 2016	2016	Safeway	Grocery	Wild Sockeye Salmon Fillet	42.90/kg	CACCCTCTATTTAGTATTTGGTGCCTGAGCCGGGATAGTCGGCACCGCCCTAAGCCTACTGATTCGGGCAGAACTAAGCCAGCCAGGCGCTCTTCTAGGAGATGACCAGATCTATAACGTAATCGTCACAGCCCATGCCTTCGTTATGATTTTCTTTATAGTCATACCAATTATAATCGGAGGATTTGGAAACTGATTAATCCCTCTAATAATCGGAGCCCCCGATATGGCATTCCCACGAATAAATAACATAAGCTTCTGACTCCTCCCCCCCTCGTTTCTCCTCCTCCTATCTTCATCTGGAGTTGAAGCCGGCGCTGGTACCGGATGAACAGTTTATCCCCCTCTGGCCGGAAACCTTGCCCACGCGGGAGCCTCTGTTGACTTAACCATCTTCTC…	Oncorhynchus nerka	Not mislabeled
MOBIL1690-16	BOLD-0DL9TIXJ1	Ambrose University	Oct 3 2016	2016	Strathcona Sobey's	Grocery	Fresh Steelhead Trout Fillet	34.90/kg	CACCCTCTATTTAGTATTTGGTGCCTGAGCCGGGATAGTAGGCACCGCCCTGAGTCTACTGATTCGGGCGGAACTAAGCCAGCCGGGCGCTCTTCTGGGGGATGACCAAATCTATAACGTGATCGTCACAGCCCATGCCTTCGTTATGATTTTCTTTATAGTCATGCCAATTATAATCGGGGGCTTTGGAAACTGATTAATTCCCCTAATAATCGGAGCCCCTGATATGGCATTTCCTCGAATAAATAACATAAGCTTCTGACTCCTTCCTCCATCCTTTCTCCTCCTCCTGTCTTCATCAGGAGTTGAAGCCGGCGCGGGTACTGGATGAACAGTATACCCCCCTCTAGCCGGCAACCTCGCCCACGCAGGAGCCTCTGTTGATTTAACTATCTTCTC…	Oncorhynchus mykiss, sp.	Not mislabeled
MOBIL1683-16	BOLD-0DHLVE9Q6	Ambrose University	Oct 4 2016	2016	Kinjo Sushi and Grill	Sushi	Spicy Tuna Roll	4.10 for 4	CACCCTCTATCTAGTATTCGGTGCATGAGCTGGAATAGTTGGCACGGCCTTAAGCTTGCTCATCCGAGCTGAACTAAGCCAACCAGGTGCCCTTCTTGGGGACGACCAGATCTACAATGTAATCGTTACGGCCCATGCCTTCGTAATGATTTTCTTTATAGTAATACCAATTATGATTGGAGGATTTGGAAACTGACTTATTCCTCTAATGATCGGAGCCCCCGACATGGCATTCCCACGAATGAACAACATGAGCTTCTGACTCCTTCCTCCCTCTTTCCTTCTGCTCCTAGCTTCTTCAGGAGTTGAGGCTGGGGCCGGAACCGGTTGAACAGTCTACCCTCCCCTTGCCGGCAACCTAGCCCACGCAGGGGCATCAGTTGACCTAACTATTTTCTC…	Thunnus alalunga, T. obesus, T. orientalis, T. thynnus	Not mislabeled
MOBIL1698-16	BOLD-0DHKU86V0	Ambrose University	Sept 29 2016	2016	Sakana Grill	Sushi	Maguro - Tuna	1.85	CACCCTTTATCTAGTATTCGGTGCATGAGCTGGAATAGTTGGCACGGCCTTAAGCTTGCTCATCCGAGCTGAACTAAGCCAACCAGGTGCCCTTCTTGGGGACGACCAGATCTACAATGTAATCGTTACGGCCCATGCCTTCGTAATGATTTTCTTTATAGTAATACCAATTATGATTGGAGGATTTGGAAACTGACTTATTCCTCTAATGATCGGAGCCCCCGACATGGCATTCCCACGAATGAACAACATGAGCTTCTGACTCCTTCCCCCCTCTTTCCTTCTGCTCCTAGCTTCTTCAGGAGTTGAGGCTGGAGCCGGAACCGGTTGAACAGTCTACCCACCCCTTGCCGGCAACCTGGCCCACGCAGGGGCATCAGTTGACCTAACTATTTTCTC…	Thunnus albacares, T. obesus	Not mislabeled
MOBIL5834-17	BOLD-3K2L0P1U3	Ambrose University	Sept 28 2017	2017	Sushi Sushi	Sushi	Ahi (Red Tuna)	4	CACCCTCTATCTAGTATTCGGTGCATGAGCTGGAATAGTTGGCACGGCCTTAAGCTTGCTCATCCGAGCTGAACTAAGCCAACCAGGTGCCCTTCTTGGGGACGACCAGATCTACAATGTAATCGTTACGGCCCATGCCTTCGTAATGATTTTCTTTATAGTAATACCAATTATGATTGGAGGATTTGGAAACTGACTTATTCCTCTAATGATCGGAGCCCCCGACATGGCATTCCCACGAATGAACAACATGAGCTTCTGACTCCTTCCCCCCTCTTTCCTTCTGCTTCTAGCTTCTTCAGGAGTTGAGGCTGGAGCCGGAACCGGTTGAACAGTCTACCCTCCCCTTGCCGGCAACCTGGCCCACGCAGGGGCATCAGTTGACCTAACTATTTTCTC…	Thunnus obesus, T. sp	Product substitution
MOBIL5737-17	BOLD-3K19UE2R9	Ambrose University	Sept 23 2017	2017	Sushi Ichiban	Sushi	Red Tuna - Ahi Tuna	3.15	CACCCTTTATCTAGTATTCGGTGCATGAGCTGGAATAGTTGGCACGGCCTTAAGCTTGCTCATCCGAGCTGAACTAAGCCAACCAGGTGCCCTTCTTGGGGACGACCAGATCTACAATGTAATCGTTACGGCCCATGCCTTCGTAATGATTTTCTTTATAGTAATACCAATTATGATTGGAGGATTTGGAAACTGACTTATTCCTCTAATGATCGGAGCCCCCGACATGGCATTCCCACGAATGAACAACATGAGCTTCTGACTCCTTCCCCCCTCTTTCCTTCTGCTCCTAGCTTCTTCAGGAGTTGAGGCTGGAGCCGGAACCGGTTGAACAGTCTACCCTCCCCTTGCCGGCAACCTGGCCCACGCAGGGGCATCAGTTGACCTAACTATTTTCTC…	Thunnus albacares	Semantic mislabeling
MOBIL5744-17	BOLD-3K1MNS5Q0	Ambrose University	Sept 25 2017	2017	Masa Sushi	Sushi	Ahi Tuna - Red Tuna	3.59	CACCCTTTATCTAGTATTCGGTGCATGAGCTGGAATAGTTGGCACGGCCTTAAGCTTGCTCATCCGAGCTGAACTAAGCCAACCAGGTGCCCTTCTTGGGGACGACCAGATCTACAATGTAATCGTTACGGCCCATGCCTTCGTAATGATTTTCTTTATAGTAATACCAATTATGATTGGAGGATTTGGAAACTGACTTATTCCTCTAATGATCGGAGCCCCCGACATGGCATTCCCACGAATGAACAACATGAGCTTCTGACTCCTTCCCCCCTCTTTCCTTCTGCTCCTAGCTTCTTCAGGAGTTGAGGCTGGAGCCGGAACCGGTTGAACAGTCTACCCACCCCTTGCCGGCAACCTGGCCCACGCAGGGGCATCAGTTGACCTAACTATTTTCTC…	Thunnus albacares, T. obesus	Semantic mislabeling
MOBIL5903-17	BOLD-3K2VZYQN2	Ambrose University	Sept 23 2017	2017	McDonalds #40478	Restaurant	Fillet-O-Fish	4.89	CACCCTTTATCTCGTATTTGGTGCCTGAGCCGGCATAGTCGGAACAGCCCTAAGCCTGCTCATTCGAGCAGAGCTAAGTCAACCTGGTGCACTTCTTGGTGATGATCAAATTTATAATGTGATCGTTACAGCGCACGCTTTCGTAATAATTTTCTTTATAGTAATACCACTAATAATTGGAGGCTTTGGAAACTGACTCATTCCTCTAATGATCGGTGCCCCAGATATAGCTTTCCCTCGAATAAATAACATAAGCTTCTGACTTCTTCCCCCATCTTTCCTGCTCCTTTTAGCATCCTCTGGTGTAGAAGCTGGGGCTGGAACAGGCTGAACTGTCTATCCACCTTTAGCCGGAAACCTCGCTCATGCTGGGGCATCTGTTGATCTTACTATTTTCTC…	Gadus chalcogrammus	Not mislabeled
MOBIL5920-17	BOLD-3K2RZXVM1	Ambrose University	Sept 27 2017	2017	Wal-Mart	Grocery	Leg Style Imitation Crab Meat: White Fish with Natural and Artificial Flavors (Alaska Pollock and Pacific Whiting listed next to MSC label)	2.96/340 g	TGGTGCACTTCTTGGTGATGATCAAATTTATAATGTGATCGTTACAGCGCACGCTTTCGTAATAATTTTCTTTATAGTAATACCACTAATAATTGGAGGCTTNGGAAACTGACTCATTCCTCTAATGATCGGTGCCCCAGATATAGCTTTCCCTCGAATAAATAACATAAGCTTCTGACTTCTTCCCCCATCTTTCCTGCTCCTTTTAGCATCCTCTGGTGTAGAAGCTGGGGCTGGAACAGGCTGAANTGTNTATCCACCTTTAGCCGGAAACCTCGCTCATGCTGGGGCATGTGTTGATCTCANTATTTTCTCTCTTCATCTAGCAGGGATTTCATCAATTCTTGGGGCAATTAATTTTATTACCACAATTATTAATATGAAACCTCCAGCAATTTC…	Gadus chalcogrammus	Not mislabeled
MOBIL5905-17	BOLD-3K14U2QR1	Ambrose University	Sept 27 2017	2017	Haru Sushi and Grill	Sushi	Alaskan salmon	9	CACCCTCTATTTAGTATTTGGTGCCTGAGCCGGGATAGTCGGCACCGCCCTAAGCCTACTGATTCGGGCAGAACTAAGCCAGCCAGGCGCTCTTCTAGGAGATGACCAGATCTATAACGTAATCGTCACAGCCCATGCCTTCGTTATGATTTTCTTTATAGTCATACCAATTATAATCGGAGGATTTGGAAACTGATTAATCCCTCTAATAATCGGAGCCCCCGATATGGCATTCCCACGAATAAATAACATAAGCTTCTGACTCCTCCCCCCCTCGTTTCTCCTCCTCCTATCTTCATCTGGAGTTGAAGCCGGCGCTGGTACCGGATGAACAGTTTATCCCCCTCTGGCCGGAAACCTTGCCCACGCGGGAGCCTCTGTTGACTTAACCATCTTCTC…	Oncorhynchus nerka	Invalid market name
MOBIL5771-17	BOLD-3K18UBTG8	Ambrose University	Sept 28 2017	2017	Real Canadian Superstore	Grocery	Albacore White Tuna	2.98	CACCCTCTATCTAGTATTTGGTGCTTGAGCCGGAATAGTAGGAACTGCACTAAGCCTCCTAATTCGGGCAGAACTAAGCCAGCCCGGCTCTCTTCTCGGAGACGACCAAATCTATAATGTAATTGTTACAGCACATGCTTTCGTAATAATTTTCTTTATAGTAATACCAATTATGATTGGAGGCTTTGGAAACTGACTAGTACCCCTCATGATTGGTGCACCAGACATGGCCTTCCCTCGAATAAATAACATGAGCTTTTGACTTCTCCCCCCCTCATTTCTTCTTCTTCTCGCCTCATCTGGAGTNGAAGCAGGTGCCGGCACAGGATGGACTGTTTATCCCCCGCTCGCAGGCAATCTTGCCCACGNTGGACCTTNTGTTGACTTAACCATCTTCTC…	Oreochromis sp, O. niloticus, O. mossambicus, O. aureus, O. aureus x niloticus, 14 O. sp	Product substitution
MOBIL5770-17	BOLD-3K4PVFJA5	Ambrose University	Sept 27 2017	2017	Sushi Hiro	Sushi	Maguro - Albacore Tuna (White)	2.25	CACCCTCTATCTAGTATTCGGTGCATGAGCTGGAATAGTTGGCACGGCCTTAAGCTTGCTCATCCGAGCTGAACTAAGCCAACCAGGTGCCCTTCTTGGGGACGACCAGATCTACAATGTAATCGTTACGGCCCATGCCTTCGTAATGATTTTCTTTATAGTAATACCAATTATGATTGGAGGATTTGGAAACTGACTTATTCCTCTAATGATCGGAGCCCCCGACATGGCATTCCCACGAATGAACAACATGAGCTTCTGACTCCTTCCTCCCTCTTTCCTTCTGCTCCTAGCTTCTTCAGGAGTTGAGGCTGGGGCCGGAACCGGTTGAACAGTCTACCCTCCCCTTGCCGGCAACCTAGCCCACGCAGGGGCATCAGTTGACCTAACTATTTTCTC…	Thunnus alalunga, T. obesus, T. orientalis, T. thynnus	Not mislabeled
MOBIL5769-17	BOLD-3K4Q152Y8	Ambrose University	Sept 27 2017	2017	Sushi Hiro	Sushi	Kanpachi - Amberjack	4	CACCCTTTATCTAGTATTTGGTGCCTGAGCCGGCATGGTCGGTACAGCCTTAAGTTTACTCATCCGAGCAGAACTAAGCCAACCCGGGGCTCTCCTGGGAGACGATCAAATTTACAACGTAATCGTTACAGCACACGCGTTTGTAATAATTTTCTTTATAGTAATGCCAATTATGATTGGAGGATTTGGGAACTGACTCATCCCTTTAATGATTGGAGCTCCCGATATAGCATTCCCTCGAATGAATAATATGAGCTTCTGACTCCTCCCTCCTTCATTCCTTCTACTCCTAGCCTCTTCGGGTGTTGAAGCCGGAGCCGGGACAGGTTGGACAGTTTACCCGCCTCTGGCCGGCAACCTCGCCCACGCAGGAGCATCCGTAGACTTAACAATTTTCTC…	Seriola dumerili, Lichia amia	Not mislabeled
MOBIL5766-17	BOLD-3K49HWXJ9	Ambrose University	Sept 22 2017	2017	Kabuku	Sushi	Sake - Atlantic Salmon	3.4	TTAACTATTTTTTCCCTCCATTTGGCNGGTATTTCTTCAATTCTTGGGGCCATTAATTTTATTACAACCATTATTAATATAAAACCCCCAGCNATCTCTCAGTATCAAACCCCACTTTTTGTNTGAGCTGTATTAGTCACAGCCGTNCTTTTGTTACTCTCCCTCCCAGTTCTAGCAGCAGGCATTACCATNCTACTTACAGACCGAAATCTAAATACCACTTTCTTTGACCCGGCAGGCGGAGGAGACCCAA	Salmo salar	Not mislabeled
MOBIL5831-17	BOLD-3K276E595	Ambrose University	Sept 28 2017	2017	Wal-Mart	Grocery	Atlantic Salmon Portions	8.97	CCCCAGCTATCTCTCAGTATCAAACCCCACTTTTTGTTTGAGCTGTATTAGTCACTGCCGTCCTTTTGTTACTCTCCCTCCCTGTTCTAGCAGCAGGCATTACCATACTACTTACAGACCGAAATCTAAATACCACTTTCTTTGACCCGGCAGGCGGAGGAGA	Salmo salar	Not mislabeled
MOBIL5890-17	BOLD-3K16CRIN0	Ambrose University	Sept 19 2017	2017	Real Canadian Superstore	Grocery	ASC Basa Fillets	4.26	CACCCTCTACCTAGTATTTGGTGCCTGAGCAGGAATAGTTGGTACGGCCCTCAGCCTCCTAATTCGGGCAGAGCTAGCCCAACCCGGCGCCCTTCTAGGCGACGACCAAATTTATAATGTTATTGTCACTGCCCATGCCTTCGTAATAATTTTCTTTATAGTAATACCAATTATAATTGGAGGCTTTGGAAACTGACTTGTCCCCTTAATAATTGGAGCGCCTGATATGGCATTCCCTCGAATAAATAATATGAGTTTTTGATTACTTCCGCCTTCCTTCCTACTATTGCTTGCCTCCTCTGGAGTAGAAGCAGGGGCAGGAACAGGATGAACTGTATATCCACCCCTTGCTGGAAACCTCGCACATGCCGGGGCTTCTGTAGATTTAACTATTTTCTC…	Pangasianodon hypophthalmus, Pangasius krempfi	Not mislabeled
MOBIL5777-17	BOLD-3K2D6M409	Ambrose University	Sept 24 2017	2017	Halibut House	Restaurant	3 Piece Basa and Chips	4.33/pc	CACCCTCTACCTAGTATTTGGTGCCTGAGCAGGAATAGTTGGTACGGCCCTCAGCCTCCTAATTCGGGCAGAGCTAGCCCAACCCGGCGCCCTTCTAGGCGACGACCAAATTTATAATGTTATTGTCACTGCCCATGCCTTCGTAATAATTTTCTTTATAGTAATACCAATTATAATTGGAGGCTTTGGAAACTGACTTGTCCCCTTAATAATTGGAGCGCCTGATATGGCATTCCCTCGAATAAATAATATGAGTTTTTGATTACTTCCGCCTTCCTTCCTACTATTGCTTGCCTCCTCTGGAGTAGAAGCAGGGGCAGGAACAGGATGAACTGTATATCCACCCCTTGCTGGAAACCTCGCACATGCCGGGGCTTCTGTAGATTTAACTATTTTCTC…	Pangasianodon hypophthalmus, Pangasius krempfi, P. bocourti, P. djambal, P. sp. 2	Not mislabeled
MOBIL5776-17	BOLD-3K2DEZIS7	Ambrose University	Sept 24 2017	2017	Real Canadian Superstore	Grocery	Basa Fillets - Pangasius hypophthalmus	10/1.36 kg	CACCCTCTACCTAGTATTTGGTGCCTGAGCAGGAATAGTTGGTACGGCCCTCAGCCTCCTAATTCGGGCAGAGCTAGCCCAACCCGGCGCCCTTCTAGGCGACGACCAAATTTATAATGTTATTGTCACTGCCCATGCCTTCGTAATAATTTTCTTTATAGTAATACCAATTATAATTGGAGGCTTTGGAAACTGACTTGTCCCCTTAATAATTGGAGCGCCTGATATGGCATTCCCTCGAATAAATAATATGAGTTTTTGATTACTTCCGCCTTCCTTCCTACTATTGCTTGCCTCCTCTGGAGTAGAAGCAGGGGCAGGAACAGGATGAACTGTATATCCACCCCTTGCTGGAAACCTCGCACATGCCGGGGCTTCTGTAGATTTAACTATTTTCTC…	Pangasianodon hypophthalmus, Pangasius krempfi, P. bocourti, P. djambal, P. sp. 2	Not mislabeled
MOBIL5865-17	BOLD-3K2RFMC99	Ambrose University	Sept 27 2017	2017	Wal-Mart	Grocery	Basa Fillets	15.37/kg	CACCCTCTACCTAGTATTTGGTGCCTGAGCAGGAATAGTTGGTACGGCCCTCAGCCTCCTAATTCGGGCAGAGCTAGCCCAACCCGGCGCCCTTCTAGGCGACGACCAAATTTATAATGTTATTGTCACTGCCCATGCCTTCGTAATAATTTTCTTTATAGTAATACCAATTATAATTGGAGGCTTTGGAAACTGACTTGTCCCCTTAATAATTGGAGCGCCTGATATGGCATTCCCTCGAATAAATAATATGAGTTTTTGATTACTTCCGCCTTCCTTCCTACTATTGCTTGCCTCCTCTGGAGTAGAAGCAGGGGCAGGAACAGGATGAACTGTATATCCACCCCTTGCTGGAAACCTCGCACATGCCGGGGCTTCTGTAGATTTAACTATTTTCTC…	Pangasianodon hypophthalmus, Pangasius krempfi, P. bocourti	Not mislabeled
MOBIL5866-17	BOLD-3K158YCA2	Ambrose University	Sept 27 2017	2017	Haru Sushi and Grill	Sushi	Basa	8	CACCCTCTACCTAGTATTTGGTGCCTGAGCAGGAATAGTTGGTACGGCCCTCAGCCTCCTAATTCGGGCAGAGCTAGCCCAACCCGGCGCCCTTCTAGGCGACGACCAAATTTATAATGTTATTGTCACTGCCCATGCCTTCGTAATAATTTTCTTTATAGTAATACCAATTATAATTGGAGGCTTTGGAAACTGACTTGTCCCCTTAATAATTGGAGCGCCTGATATGGCATTCCCTCGAATAAATAATATGAGTTTTTGATTACTTCCGCCTTCCTTCCTACTATTGCTTGCCTCCTCTGGAGTAGAAGCAGGGGCAGGAACAGGATGAACTGTATATCCACCCCTTGCTGGAAACCTCGCACATGCCGGGGCTTCTGTAGATTTAACTATTTTCTC…	Pangasianodon hypophthalmus, Pangasius krempfi, P. djambal, P. sp. 2, P. bocourti	Not mislabeled
MOBIL5896-17	BOLD-3K2EBCM85	Ambrose University	Sept 28 2017	2017	T&T Supermarket	Grocery	Basa Fillet	3.49	CACCCTCTACCTAGTATTTGGTGCCTGAGCAGGAATAGTTGGTACGGCCCTCAGCCTCCTAATTCGGGCAGAGCTAGCCCAACCCGGCGCCCTTCTAGGCGACGACCAAATTTATAATGTTATTGTCACTGCCCATGCCTTCGTAATAATTTTCTTTATAGTAATACCAATTATAATTGGAGGCTTTGGAAACTGACTTGTCCCCTTAATAATTGGAGCGCCTGATATGGCATTCCCTCGAATAAATAATATGAGTTTTTGATTACTTCCGCCTTCCTTCCTACTATTGCTTGCCTCCTCTGGAGTAGAAGCAGGGGCAGGAACAGGATGAACTGTATATCCACCCCTTGCTGGAAACCTCGCACATGCCGGGGCTTCTGTAGATTTAACTATTTTCTC…	Pangasianodon hypophthalmus, Pangasius krempfi, P. bocourti	Not mislabeled
MOBIL5909-17	BOLD-3K2MFQRU4	Ambrose University	Sept 20 2017	2017	Sho Sushi Bar and Kitchen	Sushi	Blue Fin Tuna	5.5	CACCCTCTATCTAGTATTCGGTGCATGAGCTGGAATAGTTGGCACGGCCTTAAGCTTGCTCATCCGAGCTGAACTAAGCCAACCAGGTGCCCTTCTTGGGGACGACCAGATCTACAATGTAATCGTTACGGCCCATGCCTTCGTAATGATTTTCTTTATAGTAATACCAATTATGATTGGAGGATTTGGAAACTGACTTATTCCTCTAATGATCGGAGCCCCCGACATGGCATTCCCACGAATGAACAACATGAGCTTCTGACTCCTCCCTCCCTCTTTCCTTCTGCTCCTAGCTTCTTCAGGAGTTGAGGCTGGGGCCGGAACCGGTTGAACAGTCTACCCTCCCCTTGCCGGCAACCTAGCCCACGCAGGGGCATCAGTTGACCTAACTATTTTCTC…	Thunnus orientalis, T. thynnus, T. alalunga, T. maccoyii, T. obesus	Not mislabeled
MOBIL5838-17	BOLD-3K21Y04X1	Ambrose University	Sept 16 2017	2017	Tata Sushi (Japanese Sushi and Grill)	Sushi	Butter Fish/Oil Fish	2.75	CCTTCTCGGAGACGACCAAATTTATAATGTAATCGTTACGGCACACGCCTTCGTAATAATCTTCTTTATAGTAATACCAGTCATGATCGGAGGATTTGGGAACTGACTTATCCCTCTAATAATTGGAGCCCCCGACATAGCATTCCCTCGAATGAATAACATAAGCTTTTGACTTCTGCCTCCATCCTTCCTCCTGCTATTAGCCTCTTCAGGAGTTGAAGCCGGAGCTGGAACCGGGTGGACAGTATACCCTCCCCTGGCCGGTAATTTAGCCCATGCTGGAGCATCCGTTGACCTAACCATTTTTTCCCTGCACTTAGCAGGGATCTCCTCAATCCTCGGGGCCATTAATTTTATTACAACAATTATTAACATGAAACCCGCAGCCATCTCCCAATA…	Lepidocybium flavobrunneum	Product substitution
MOBIL5773-17	BOLD-3K17R5FL4	Ambrose University	Sept 22 2017	2017	National	Restaurant	Fish & Chips (Cod communicated)	11	CACCCTTTATCTCGTATTTGGTGCCTGAGCCGGCATAGTCGGAACAGCCCTAAGCCTGCTCATTCGAGCAGAGCTAAGTCAACCTGGTGCACTTCTTGGTGATGATCAAATTTATAATGTGATCGTTACAGCGCACGCTTTCGTAATAATTTTCTTTATAGTAATACCACTAATAATTGGAGGCTTTGGGAACTGACTCATTCCTCTAATGATCGGTGCACCAGATATAGCTTTCCCTCGAATAAATAACATAAGCTTCTGACTTCTTCCTCCATCTTTCCTGCTCCTTTTAGCATCCTCTGGTGTAGAAGCTGGGGCTGGAACAGGCTGAACTGTCTATCCACCTTTAGCCGGAAACCTCGCTCATGCTGGGGCATCTGTTGATCTCACTATTTTTTC…	Gadus morhua	Not mislabeled
MOBIL5921-17	BOLD-3K2QU8VO4	Ambrose University	Sept 27 2017	2017	Wal-Mart	Grocery	Boned Salted Cod	23.08/kg	CACCCTTTATCTCGTATTTGGTGCCTGAGCCGGCATAGTCGGAACAGCCCTAAGCCTACTCATTCGAGCAGAGCTAAGTCAACCTGGTGCACTCCTAGGTGATGATCAAATTTATAATGTGATCGTTACAGCGCACGCTTTCGTAATAATTTTCTTTATAGTAATACCACTAATAATTGGAGGCTTTGGGAACTGACTCATTCCTCTAATGATCGGTGCCCCCGATATAGCTTTCCCTCGAATAAATAACATAAGCTTCTGACTTCTCCCTCCATCTTTCCTGCTCCTTTTAGCATCCTCTGGTGTAGAAGCTGGAGCTGGAACAGGCTGAACTGTCTACCCACCTTTAGCCGGAAACCTCGCTCATGCTGGGGCATCTGTTGATCTCACTATTTTTTC…	Gadus macrocephalus, Gadus ogac, Boreogadus saida	Not mislabeled
MOBIL5711-17	BOLD-3K2WZCYG7	Ambrose University	Sept 28 2017	2017	T and T Supermarket	Grocery	Fresh Corvina	6.99/lb	CACCCTCTACCTGATTTTTGGTGCATGAGCCGGAATAGTCGGCACAGCTTTAAGCCTACTGATTCGAGCCGAACTTAGCCAACCTGGCGCACTCCTCGGAGACGACCAAATCTATAACGTAATCGTTACGGCGCATGCCTTCGTTATAATTTTCTTTATAGTAATGCCCATCATAATTGGGGGCTTCGGAAACTGACTTGTACCTCTAATGATTGGAGCCCCCGATATAGCATTCCCTCGGATGAATAATATGAGCTTCTGACTTCTCCCCCCTTCTTTCCTGCTACTCCTAACCTCCTCAGGAGTAGAGGCAGGTGCCGGAACAGGCTGAACAGTCTACCCTCCCCTCGCCGGGAATCTTGCACACGCAGGAGCCTCTGTCGACTTAGCCATTTTCTC…	Micropogonias furnieri	Product substitution
MOBIL5911-17	BOLD-3K1AIESZ2	Ambrose University	Sept 28 2017	2017	Tokachi Japanese Restaurant	Sushi	Dancing Eel	2	CACCCTATATCTCGTATTTGGTGCCTGAGCCGGAATAGTCGGTACTGCACTGAGCCTTCTAATCCGTGCCGAATTAAGTCAACCAGGCGCCCTTCTTGGAGATGACCAAATTTACAATGTCATCGTCACAGCGCATGCCTTTGTAATGATTTTCTTTATAGTAATGCCAGTAATAATCGGAGGATTTGGCAACTGACTTGTGCCATTAATAATCGGCGCTCCAGACATAGCATTCCCCCGAATAAATAATATAAGCTTCTGACTTTTACCCCCATCATTTCTTCTACTACTAGCCTCCTCTGGAGTAGAGGCTGGGGCTGGTACAGGCTGAACTGTATATCCGCCCCTGGCTGGAAACTTAGCCCACGCCGGAGCATCTGTTGACCTGACAATTTTCTC…	Anguilla rostrata	Semantic mislabeling
MOBIL5904-17	BOLD-3K2MEIQN8	Ambrose University	Sept 20 2017	2017	Bluefin Sushi and Thai	Sushi	Eel A/C Roll	???	CACCCTATATCTCGTATTTGGTGCCTGAGCCGGAATAGTCGGTACTGCACTGAGCCTTCTAATCCGTGCCGAATTAAGTCAACCAGGCGCCCTTCTTGGAGATGACCAAATTTACAATGTCATCGTCACAGCGCATGCCTTTGTAATGATTTTCTTTATAGTAATGCCAGTAATAATCGGAGGATTTGGCAACTGACTTGTGCCATTAATAATCGGCGCTCCAGACATAGCGTTCCCCCGAATAAATAATATAAGCTTCTGACTTTTACCCCCATCATTTCTTCTACTGCTAGCCTCCTCTGGAGTAGAGGCTGGGGCTGGTACAGGCTGAACTGTATATCCACCCCTGGCTGGAAACTTAGCCCACGCCGGAGCATCTGTTGACCTGACAATTTTCTC…	Anguilla rostrata	Not mislabeled
MOBIL5858-17	BOLD-3K2XP8AG2	Ambrose University	Sept 20 2017	2017	Sho Sushi Bar and Kitchen	Sushi	Unagi Fresh Water Eel	3	CACCCTATATCTCGTATTTGGTGCCTGAGCCGGAATAGTCGGTACTGCACTGAGCCTTCTAATCCGTGCCGAATTAAGTCAACCAGGCGCCCTTCTTGGAGATGACCAAATTTACAATGTCATCGTCACAGCGCATGCCTTTGTAATGATTTTCTTTATAGTAATGCCAGTAATAATCGGAGGATTTGGCAACTGACTTGTGCCATTAATAATCGGCGCTCCAGACATAGCATTCCCCCGAATAAATAATATAAGCTTCTGACTTTTACCCCCATCATTTCTTCTACTACTAGCCTCCTCTGGAGTAGAGGCTGGGGCTGGTACAGGCTGAACTGTATATCCGCCCCTGGCTGGAAACTTAGCCCACGCCGGAGCATCTGTTGACCTGACAATTTTCTC…	Anguilla rostrata	Semantic mislabeling
MOBIL5782-17	BOLD-3K40R9878	Ambrose University	Sept 23 2017	2017	Sushi Ichiban	Sushi	Unagi - Fresh water eel (broiled)	2.6	CACCCTATATCTCGTATTTGGTGCCTGAGCCGGAATAGTCGGCACTGCACTGAGCCTTCTAATCCGTGCCGAATTAAGTCAACCAGGCGCCCTTCTTGGAGATGACCAAATTTACAATGTCATCGTCACAGCGCATGCCTTTGTAATGATTTTCTTTATAGTAATGCCAGTAATAATCGGAGGATTTGGCAACTGACTTGTGCCATTAATAATCGGCGCTCCAGACATAGCGTTCCCCCGAATAAATAATATAAGCTTCTGACTTTTACCCCCATCATTTCTTCTACTGCTAGCCTCCTCTGGAGTAGAGGCTGGGGCTGGTACAGGCTGAACTGTATATCCACCCCTGGCTGGAAACTTAGCCCACGCCGGAGCATCTGTTGACCTGACAATTTTCTC…	Anguilla rostrata	Semantic mislabeling
MOBIL5757-17	BOLD-3K1WOGMY2	Ambrose University	Sept 27 2017	2017	Real Canadian Superstore	Grocery	Freshwater Whole Smelt	9.98	CACCCTTTATCTAATCTTTGGGGCCTGGGCAGGGATAGTAGGGACGGCTTTAAGCCTCCTTATCCGAGCCGAGCTAAGCCAACCTGGTGCTCTCCTGGGGGACGACCAGATTTATAATGTTATCGTCACCGCGCACGCTTTTGTTATAATCTTTTTTATAGTAATACCGATTATGATCGGCGGGTTTGGCAACTGGCTCATCCCCCTTATGATTGGGGCCCCAGATATGGCCTTCCCTCGCATAAATAATATGAGCTTCTGACTTTTACCTCCCTCCTTTCTTCTTCTCTTAGCTTCTTCCGGGGTTGAAGCAGGCGCCGGGACTGGTTGAACAGTCTATCCCCCACTTGCTGGCAATTTGGCCCACGCGGGAGCTTCCGTAGATTTAACAATTTTCTC…	Osmerus mordax	Semantic mislabeling
MOBIL5713-17	BOLD-3K2WYZJA5	Ambrose University	Sept 28 2017	2017	T and T Supermarket	Grocery	FZ Goldon Threadfin Bream Gutted (spelling mistake on sign)	6.99/lb	CACCCTTTATCTCTTATTTGGTGCTTGGGCTGGTATAGTCGGGACCGCATTAAGTCTACTAATTCGAGCAGAACTTAGTCAACCCGGGGCCCTTTTAGGCGATGACCAAATTTATAATGTTATTGTTACGGCTCACGCCTTCGTTATAATTTTCTTTATAGTAATGCCAATTATGATTGGAGGGTTCGGAAACTGACTTATCCCCCTTATAATTGGAGCCCCCGATATAGCATTTCCCCGAATAAACAATATGAGCTTCTGACTCTTGCCCCCTTCTTTCCTTCTACTTCTTGCTTCCTCTGGCATTGAAGCAGGGGCAGGAACAGGTTGAACAGTTTATCCCCCTCTTGCAGGGAACCTAGCACATGCAGGAGCATCTGTTGACTTAACTATTTTTTC…	Nemipterus tambuloides, N. japonicus	Product substitution
MOBIL5913-17	BOLD-3K2FW4T54	Ambrose University	Sept 20 2017	2017	Schooners on First	Restaurant	Fish Taco (communicated as Halibut)	4.65/taco	CACCCTCTATCTCGTATTTGGTGCCTGAGCCGGAATAGTGGGGACAGGCCTAAGTCTGCTTATTCGGGCAGAACTAAGCCAACCCGGGGCTCTCCTGGGAGACGACCAAATTTATAATGTAATCGTCACCGCACACGCCTTTGTAATAATCTTTTTTATAGTAATACCCATTATGATTGGGGGGTTCGGAAACTGGCTTATCCCACTAATAATTGGGGCCCCAGATATGGCGTTCCCTCGAATGAATAATATGAGTTTCTGACTTCTTCCCCCCTCCTTTCTCCTCCTCTTAGCCTCTTCAGGTGTTGAAGCCGGAGCAGGTACCGGATGAACCGTATACCCCCCACTAGCTGGCAATTTAGCCCACGCCGGAGCATCCGTAGACCTGACAATCTTCTC…	Hippoglossus stenolepis, H. hippoglossus	Not mislabeled
MOBIL5919-17	BOLD-3K14MCVA4	Ambrose University	Sept 27 2017	2017	Haru Sushi and Grill	Sushi	Halibut	6.05	CACCCTCTATCTCGTATTTGGTGCCTGAGCCGGAATAGTGGGGACAGGCCTAAGTCTGCTTATTCGGGCAGAACTAAGCCAACCCGGGGCTCTCCTGGGAGACGACCAAATTTATAATGTAATCGTCACCGCACACGCCTTTGTAATAATCTTTTTTATAGTAATACCCATTATGATTGGGGGGTTCGGAAACTGGCTTATTCCACTAATAATTGGGGCCCCAGATATGGCGTTCCCTCGAATGAATAATATGAGTTTCTGACTTCTTCCCCCCTCCTTTCTCCTCCTCTTAGCCTCTTCAGGTGTTGAAGCCGGAGCAGGTACCGGATGAACCGTATACCCCCCACTAGCTGGCAATTTAGCCCACGCCGGAGCATCCGTAGACCTGACAATCTTCTC…	Hippoglossus stenolepis, H. hippoglossus	Not mislabeled
MOBIL5933-17	BOLD-3K2H60YZ5	Ambrose University	Sept 20 2017	2017	Misato Sushi	Sushi	Hamachi - Yellow Tail Tuna	3.25	CACCCTCTATCTGGTATTCGGTGCCTGAGCCGGCATGGTCGGTACAGCTTTAAGTTTACTCATCCGAGCAGAACTTAGTCAACCCGGTGCTCTTCTGGGAGACGATCAAATTTATAACGTAATCGTTACAGCGCACGCGTTTGTAATAATTTTCTTTATAGTAATGCCAATTATGATTGGAGGGTTTGGGAACTGACTCATCCCCTTAATGATCGGGGCTCCCGATATAGCATTCCCCCGAATAAACAACATGAGCTTCTGACTCCTTCCCCCTTCATTCCTCCTACTTCTGGCCTCTTCAGGTGTTGAAGCCGGAGCTGGGACGGGTTGGACAGTCTACCCGCCCCTAGCCGGCAACCTTGCTCACGCGGGAGCATCCGTAGACTTAACAATTTTCTC…	Seriola quinqueradiata, Elagatis bipinnulata	Invalid market name
MOBIL5878-17	BOLD-3K4IZ7EO3	Ambrose University	Sept 27 2017	2017	Sushi Hiro Japanese Restaurant	Sushi	Hamachi - Yellowtail Jackfish	2.75	CACCCTCTATCTGGTATTCGGTGCCTGAGCCGGCATGGTCGGTACAGCTTTAAGTTTACTCATCCGAGCAGAACTTAGTCAACCCGGTGCTCTTCTGGGAGACGATCAAATTTATAACGTAATCGTTACAGCGCACGCGTTTGTAATAATTTTCTTTATAGTAATGCCAATTATGATTGGAGGGTTTGGGAACTGACTCATCCCCTTAATGATCGGGGCTCCCGATATAGCATTCCCCCGAATAAACAACATGAGCTTCTGACTCCTTCCCCCTTCATTCCTCCTACTTCTGGCCTCTTCAGGTGTTGAAGCCGGAGCTGGGACGGGTTGGACAGTCTACCCGCCCCTAGCCGGCAACCTTGCTCACGCGGGAGCATCCGTAGACTTAACAATTTTCTC…	Seriola quinqueradiata, Elagatis bipinnulata	Invalid market name
MOBIL5887-17	BOLD-3K1YHAIB2	Ambrose University	Sept 12 2017	2017	Haru Sushi	Sushi	Imitation Crab	14.99 for lunch combo	CACCCTTTATCTCGTATTTGGTGCCTGAGCCGGCATAGTCGGAACAGCCCTAAGCCTGCTCATTCGAGCAGAGCTAAGTCAACCTGGTGCACTTCTTGGTGATGATCAAATTTATAATGTGATCGTTACAGCGCACGCTTTCGTAATAATTTTCTTTATAGTAATACCACTAATAATTGGAGGCTTTGGAAACTGACTCATTCCTCTAATGATCGGTGCCCCAGATATAGCTTTCCCTCGAATAAATAACATAAGCTTCTGACTTCTTCCCCCATCTTTCCTGCTCCTTTTAGCATCCTCTGGTGTAGAAGCTGGGGCTGGAACAGGCTGAACTGTCTATCCACCTTTAGCCGGAAACCTCGCTCATGCTGGGGCATCTGTTGATCTCACTATTTTCTC…	Gadus chalcogrammus	Not mislabeled
MOBIL5856-17	BOLD-3K1X4JA68	Ambrose University	Sept 20 2017	2017	Misato Sushi	Sushi	Aji - Jack Mackerel	2.95	CACCCTTTATCTAGTATTTGGTGCTTGAGCTGGAATAGTAGGAACCGCTTTAAGCCTGCTTATTCGGGCAGAACTAAGCCAACCTGGCGCCCTTCTAGGGGATGACCAAATTTACAACGTAATTGTTACGGCCCACGCTTTCGTAATAATTTTCTTTATAGTAATGCCAATTATGATTGGAGGCTTTGGAAACTGACTGATTCCGCTAATGATCGGGGCCCCTGATATAGCCTTCCCTCGAATGAATAACATGAGCTTCTGACTACTCCCTCCCTCCTTCCTTTTGCTTTTAGCCTCTTCAGGGGTTGAAGCCGGGGCCGGAACTGGTTGAACAGTCTATCCCCCACTGGCTGGGAACCTTGCCCACGCCGGAGCGTCCGTAGATTTAACCATCTTCTC…	Trachurus japonicus, T. declivis, T. novaezelandiae	Not mislabeled
MOBIL5848-17	BOLD-3K2HJI6S0	Ambrose University	Sept 20 2017	2017	Misato Sushi	Sushi	Saba - Japanese Mackerel	2.5	CACCCTCTACCTAGTATTTGGTGCATGATCTGGAATAGTTGGCACGGCCTTAAGCTTGCTTATCCGAGCCGAACTAAGCCAACCAGGGTCCCTTCTCGGCGACGACCAAGTTTATAACGTAATTGTTACGGCCCATGCCTTCATTATAATCTTCTTTTTAGTAATACCAGTCATGATTGGAGGGTTCGGAAACTGACTTATCCCCCTAATGATCGGAGCCCCCGATATAGCGTTCCCCCGAATGAATAACATAAGCTTCTGACTTCTTCCCCCTTCTCTCCTACTACTCCTGTCTTCTTCGGCAGTTGAAGCTGGAGCCGGAACTGGCTGAACAGTCTACCCCCCACTAGCTGGTAACCTAGCGCATGCCGGGGCATCAGTTGACCTAACCATCTTCTC…	Scomber scombrus	Invalid market name
MOBIL5855-17	BOLD-3K1P4IA50	Ambrose University	Sept 17 2017	2017	Fusion Sushi	Sushi	Mackerel Sashimi	5.5/3 pc	CACCCTCTACCTAGTATTTGGTGCATGATCTGGAATAGTTGGCACGGCCTTAAGCTTGCTTATCCGAGCCGAACTAAGCCAACCAGGGTCCCTTCTCGGCGACGACCAAGTTTATAACGTAATTGTTACGGCCCATGCCTTCATTATAATCTTCTTTTTAGTAATACCAGTCATGATTGGAGGGTTCGGAAACTGACTTATCCCCCTAATGATCGGAGCCCCCGATATAGCGTTCCCCCGAATGAATAACATAAGCTTCTGACTTCTTCCCCCTTCTCTCCTACTACTCCTGTCTTCTTCGGCAGTTGAAGCTGGAGCCGGAACTGGCTGAACAGTCTACCCCCCACTAGCTGGTAACCTAGCGCATGCCGGGGCATCAGTTGACCTAACCATCTTCTC…	Scomber scombrus	Not mislabeled
MOBIL5832-17	BOLD-3K1QAW0N7	Ambrose University	Sept 19 2017	2017	A+ Buffet Sushi Bar	Sushi	Mackerel	1.5	CACCCTCTACCTAGTATTTGGTGCATGATCTGGAATAGTTGGCACGGCCTTAAGCTTGCTTATCCGAGCTGAACTAAGCCAACCAGGGTCCCTTCTCGGCGACGACCAAGTTTATAACGTAATTGTTACGGCCCATGCCTTCATTATAATCTTCTTTTTAGTAATACCAGTCATGATTGGAGGGTTCGGAAACTGACTGATCCCCCTAATGATCGGAGCCCCCGATATAGCATTCCCCCGAATGAATAACATAAGCTTCTGACTTCTCCCCCCTTCTCTCCTACTACTCCTGTCTTCTTCGGCAGTTGAAGCTGGAGCCGGAACTGGCTGAACAGTCTACCCCCCACTAGCTGGTAACCTAGCGCATGCCGGGGCATCAGTTGACCTAACCATCTTCTC…	Scomber scombrus	Not mislabeled
MOBIL5860-17	BOLD-3K2NIFBA2	Ambrose University	Sept 20 2017	2017	Sho Sushi Bar and Kitchen	Sushi	Saba - Marinated Mackerel	2	CACCCTCTACCTAGTATTTGGTGCATGATCTGGAATAGTTGGCACGGCCTTAAGCTTGCTTATCCGAGCCGAACTAAGCCAACCAGGGTCCCTTCTCGGCGACGACCAAGTTTATAACGTAATTGTTACGGCCCATGCCTTCATTATAATCTTCTTTTTAGTAATACCAGTCATGATTGGAGGGTTCGGAAACTGACTTATCCCCCTAATGATCGGAGCCCCCGATATAGCGTTCCCCCGAATGAATAACATAAGCTTCTGACTTCTTCCCCCTTCTCTCCTACTACTCCTGTCTTCTTCGGCAGTTGAAGCTGGAGCCGGAACTGGCTGAACAGTCTACCCCCCACTAGCTGGTAACCTAGCGCATGCCGGGGCATCAGTTGACCTAACCATCTTCTC…	Scomber scombrus	Not mislabeled
MOBIL5892-17	BOLD-3K42ZFIY5	Ambrose University	Sept 22 2017	2017	Haru Sushi and Grill	Sushi	Saba - Mackarel (spelling mistake on menu)	2.29	TCTACCTAGTATTTGGTGCATGAGCTGGAATAGTTGGCACGGCCTTAAGCTTGCTTATCCGAGCTGAACTAAGTCAACCAGGGTCCCTTCTCGGCGACGACCAAATCTACAACGTAATTGTTACGGCCCACGCCTTCGTTATAATCTTCTTTTTAGTAATGCCAGTTATGATTGGAGGGTTCGGAAACTGACTGATCCCCCTAATGATCGGAGCCCCCGACATGGCATTTCCCCGAATAAATAACATAAGCTTCTGACTTCTGCCCCCCTCTCTCCTGCTGCTCCTGTCTTCTTCGGCAGTTGAAGCCGGTGCCGGAACTGGCTGAACAGTTTATCCTCCCCTCGCTGGGAACCTGGCACACGCCGGGGCATCAGTTGATTTGACCATCTTCTCACTCC…	Scomber japonicus, Scomber sp	Not mislabeled
MOBIL5781-17	BOLD-3K40FGZ75	Ambrose University	Sept 23 2017	2017	Sushi Ichiban	Sushi	Saba - Mackerel	1.75	CACCCTCTACCTAGTATTTGGTGCATGATCTGGAATAGTTGGCACGGCCTTAAGCTTGCTTATCCGAGCCGAACTAAGCCAACCAGGGTCCCTTCTCGGCGACGACCAAGTTTATAACGTAATTGTTACGGCCCATGCCTTCATTATAATCTTCTTTTTAGTAATACCAGTCATGATTGGAGGGTTCGGAAACTGACTTATCCCCCTAATGATCGGAGCCCCCGATATAGCGTTCCCCCGAATGAATAACATAAGCTTCTGACTTCTTCCCCCTTCTCTCCTACTACTCCTGTCTTCTTCGGCAGTTGAAGCTGGAGCCGGAACTGGCTGAACAGTCTACCCCCCACTAGCTGGTAACCTAGCGCATGCCGGGGCATCAGTTGACCTAACCATCTTCTC…	Scomber scombrus	Not mislabeled
MOBIL5925-17	BOLD-3K25BPX49	Ambrose University	Sept 23 2017	2017	Yume Sushi	Sushi	Saba - Mackerel	1.25	CACCCTCTACCTAGTATTTGGTGCATGATCTGGAATAGTTGGCACGGCCTTAAGCTTGCTTATCCGAGCCGAACTAAGCCAACCAGGGTCCCTTCTCGGCGACGACCAAGTTTATAACGTAATTGTTACGGCCCATGCCTTCATTATAATCTTCTTTTTAGTAATACCAGTCATGATTGGAGGGTTCGGAAACTGACTTATCCCCCTAATGATCGGAGCCCCCGATATAGCGTTCCCCCGAATGAATAACATAAGCTTCTGACTTCTTCCCCCTTCTCTCCTACTACTCCTGTCTTCTTCGGCAGTTGAAGCTGGAGCCGGAACTGGCTGAACAGTCTACCCCCCACTAGCTGGTAACCTAGCGCATGCCGGGGCATCAGTTGACCTAACCATCTTCTC…	Scomber scombrus	Not mislabeled
MOBIL5836-17	BOLD-3K4H0T2F3	Ambrose University	Sept 27 2017	2017	Sushi Hiro Japanese Restaurant	Sushi	Saba - Mackerel	2.75	TAGTATTTGGTGCATGATCTGGAATAGTTGGCACGGCCTTAAGCTTGCTTATCCGAGCTGAACTAAGCCAACCAGGGTCCCTTCTCGGCGACGACCAAGTTTATAACGTAATTGTTACGGCCCATGCCTTCATTATAATCTTCTTTTTAGTAATACCAGTCATGATTGGAGGGTTCGGAAACTGACTTATCCCCCTAATGATCGGAGCCCCCGATATAGCGTTCCCCCGAATGAATAACATAAGCTTCTGACTTCTTCCCCCTTCTCTCCTACTACTCCTGTCTTCTTCGGCAGTTGAAGCTGGAGCCGGAACTGGNTGAACAGTCTACCCCCCACTAGCNGGTAACCTAGCGCATGCCGGGGCATCAGTTGACCTAACCATCTTCTCCCTTCACCTAG…	Scomber scombrus	Not mislabeled
MOBIL5889-17	BOLD-3K1ACNID6	Ambrose University	Sept 27 2017	2017	Fusion Sushi	Sushi	Mackerel	1.75	CACCCTCTACCTAGTATTTGGTGCATGATCTGGAATAGTTGGCACGGCCTTAAGCTTGCTTATCCGAGCCGAACTAAGCCAACCAGGGTCCCTTCTCGGCGACGACCAAGTTTATAACGTAATTGTTACGGCCCATGCCTTCATTATAATCTTCTTTTTAGTAATACCAGTCATGATTGGAGGGTTCGGAAACTGACTTATCCCCCTAATGATCGGAGCCCCCGATATAGCGTTCCCCCGAATGAATAACATAAGCTTCTGACTTCTTCCCCCTTCTCTCCTACTACTCCTGTCTTCTTCGGCAGTTGAAGCTGGAGCCGGAACTGGCTGAACAGTCTACCCCCCACTAGCTGGTAACCTAGCGCATGCCGGGGCATCAGTTGACCTAACCATCTTCTC…	Scomber scombrus	Not mislabeled
MOBIL5845-17	BOLD-3K2CDP6F1	Ambrose University	Sept 28 2017	2017	Tokachi Japanese Restaurant	Sushi	Mackerel	1.25	CACCCTCTACCTAGTATTTGGTGCATGATCTGGAATAGTTGGCACGGCCTTAAGCTTGCTTATCCGAGCCGAACTAAGCCAACCAGGGTCCCTTCTCGGCGACGACCAAGTTTATAACGTAATTGTTACGGCCCATGCCTTCATTATAATCTTCTTTTTAGTAATACCAGTCATGATTGGAGGGTTCGGAAACTGACTTATCCCCCTAATGATCGGAGCCCCCGATATAGCGTTCCCCCGAATGAATAACATAAGCTTCTGACTTCTTCCCCCTTCTCTCCTACTACTCCTGTCTTCTTCGGCAGTTGAAGCTGGAGCCGGAACTGGCTGAACAGTCTACCCCCCACTAGCTGGTAACCTAGCGCATGCCGGGGCATCAGTTGACCTAACCATCTTCTC…	Scomber scombrus	Not mislabeled
MOBIL5927-17	BOLD-3K2FBMXD3	Ambrose University	Sept 20 2017	2017	Schooners on First	Restaurant	New Zealand Blue Cod (Fish & Chips)	11.5	CACCCTCTATCTCGTATTTGGTGCCTGAGCCGGCATAGTCGGAACAGCCTTAAGCCTGCTCATTCGAGCAGAACTAAGTCAACCCGGCGCACTCCTCGGTGATGATCAGATTTATAATGTGATCGTTACAGCACACGCTTTCGTAATAATTTTCTTTATAGTAATGCCGCTAATAATTGGGGGCTTCGGGAACTGACTTATCCCTCTAATGATCGGCGCTCCTGACATAGCCTTCCCCCGAATAAATAACATAAGCTTCTGACTTCTCCCTCCCTCGTTCCTTCTTCTTTTAGCATCCTCTGGTGTAGAAGCCGGGGCCGGAACAGGCTGAACTGTATATCCCCCTCTAGCAGGTAACCTCGCTCACGCCGGAGCCTCTGTTGATCTCACTATTTTCTC…	Micromesistius australis	Semantic mislabeling
MOBIL5758-17	BOLD-3K1VS94N0	Ambrose University	Sept 27 2017	2017	Real Canadian Superstore	Grocery	Wild Pacific Cod Fillets	10	CACCCTTTATCTCGTATTTGGTGCCTGAGCCGGCATAGTCGGAACAGCCCTAAGCCTACTCATTCGAGCAGAGCTAAGTCAACCTGGTGCACTCCTAGGTGATGATCAAATTTATAATGTGATCGTTACAGCGCACGCTTTCGTAATAATTTTCTTTATAGTAATACCACTAATAATTGGAGGCTTTGGGAACTGACTCATTCCTCTAATGATCGGTGCCCCCGATATAGCTTTCCCTCGAATAAATAACATAAGCTTCTGACTTCTCCCTCCATCTTTCCTGCTCCTTTTAGCATCCTCTGGTGTAGAAGCTGGAGCTGGAACAGGCTGAACTGTCTACCCACCTTTAGCCGGAAACCTCGCTCATGCTGGGGCATCTGTTGATCTCACTATTTTTTC…	Gadus macrocephalus, Gadus ogac, Boreogadus saida	Not mislabeled
MOBIL5872-17	BOLD-3K278UDG2	Ambrose University	Sept 28 2017	2017	Wal-Mart	Grocery	Wild Pacific Cod Fillets	26.40/kg	CACCCTTTATCTCGTATTTGGTGCCTGAGCCGGCATAGTCGGAACAGCCCTAAGCCTACTCATTCGAGCAGAGCTAAGTCAACCTGGTGCACTCCTAGGTGATGATCAAATTTATAATGTGATCGTTACAGCGCACGCTTTCGTAATAATTTTCTTTATAGTAATACCACTAATAATTGGAGGCTTTGGGAACTGACTCATTCCTCTAATGATCGGTGCCCCCGATATAGCTTTCCCTCGAATAAATAACATAAGCTTCTGACTTCTCCCCCCATCTTTCCTGCTCCTTTTAGCATCCTCTGGTGTAGAAGCTGGAGCTGGAACAGGCTGAACTGTCTACCCACCTTTAGCCGGAAACCTCGCTCATGCTGGGGCATCTGTTGATCTCACTATTTTTTC…	Gadus macrocephalus, Gadus ogac, Boreogadus saida	Not mislabeled
MOBIL5922-17	BOLD-3K2FM7VY6	Ambrose University	Sept 20 2017	2017	Schooners on First	Restaurant	Pacific Halibut (Fish & Chips)	15.95	CACCCTCTATCTCGTATTTGGTGCCTGAGCCGGAATAGTGGGGACAGGCCTAAGTCTGCTTATTCGGGCAGAACTAAGCCAACCCGGGGCTCTCCTGGGAGACGACCAAATTTATAATGTAATCGTCACCGCACACGCCTTTGTAATAATCTTTTTTATAGTAATACCCATTATGATTGGGGGGTTCGGAAACTGGCTTATTCCACTAATAATTGGGGCCCCAGATATGGCGTTCCCTCGAATGAATAACATGAGTTTCTGACTTCTTCCCCCCTCCTTTCTCCTCCTCTTAGCCTCTTCAGGTGTTGAAGCCGGAGCAGGTACCGGATGAACCGTATACCCCCCACTAGCTGGCAATTTAGCCCACGCCGGAGCATCCGTAGACCTGACAATCTTCTC…	Hippoglossus stenolepis, H. hippoglossus	Not mislabeled
MOBIL5893-17	BOLD-3K28XAJ97	Ambrose University	Sept 28 2017	2017	Calgary Coop	Grocery	Snapper Fillets Yellowtail Wild Pacific / Fresh	22.90/kg	CACCCTTTATCTAGTATTTGGTGCATGAGCCGGTATAGTAGGCACAGCCCTCAGCCTACTCATTCGAGCAGAACTAAGCCAACCGGGCGCTCTCCTTGGAGACGACCAAATTTATAATGTAATCGTTACAGCACATGCCTTCGTAATGATTTTCTTTATAGTAATGCCAATTATAATTGGAGGTTTTGGAAACTGATTAATTCCCCTAATGATTGGAGCCCCAGATATAGCATTTCCTCGTATAAATAACATAAGTTTCTGACTTCTACCCCCTTCTTTCCTACTACTACTTGCCTCTTCTGGAGTAGAAGCGGGTGCCGGAACCGGGTGAACAGTGTACCCGCCCCTGGCTGGTAATTTAGCCCACGCAGGAGCATCAGTCGACTTGACAATCTTTTC…	Sebastes brevispinis, S. zacentrus, S. borealis, S. sp., S. wilsoni, S. emphaeus, S. rufus	Product substitution
MOBIL5741-17	BOLD-3K1M6XNE4	Ambrose University	Sept 23 2017	2017	Sobey's	Grocery	Wild Pacific Pink Salmon	2.49 (213 g)	CACCCTCTATTTAGTATTTGGTGCCTGAGCCGGGATAGTAGGCACCGCCCTAAGCCTACTAATTCGGGCAGAACTAAGCCAGCCAGGCGCTCTTCTAGGGAATGACCAGATCTATAACGTAATCGTTACAGCCCATGCCTTCGTTATGATTTTCTTTATAGTCATACCAATTATAATCGGAGGCTTTGGAAACTGATTAATCCCCCTAATGATCGGGGCACCAGATATAGCATTTCCACGAATAAACAACATAAGCTTCTGACTCCTGCCCCCATCCTTCCTCCTCCTCCTTTCTTCATCTGGAGTNGAAGCCGGCGCTGGTACCGGATGGACAGTTTATCCCCCTCTAGCCGGGAACCTTGCCCACGCAGGAGCATCCGTCGACTTAACTATCTTCTC…	Oncorhynchus gorbuscha	Not mislabeled
MOBIL5929-17	BOLD-3K2F56XZ8	Ambrose University	Sept 28 2017	2017	T&T Supermarket	Grocery	Pollock Fillets	1.33	CACCCTTTATCTCGTATTTGGTGCCTGAGCCGGCATAGTCGGAACAGCCCTAAGCCTGCTCATTCGAGCAGAGCTAAGTCAACCTGGTGCACTTCTTGGTGACGATCAAATTTATAATGTGATCGTTACAGCGCACGCTTTCGTAATAATTTTCTTTATAGTAATACCACTAATAATTGGAGGCTTTGGAAACTGACTCATTCCTCTAATGATCGGTGCCCCAGATATAGCTTTCCCTCGAATAAATAACATAAGCTTCTGACTTCTTCCCCCATCTTTCCTGCTCCTTTTAGCATCCTCTGGTGTAGAAGCTGGGGCTGGAACAGGCTGAACTGTTTATCCACCTTTAGCCGGAAACCTCGCTCATGCTGGGGCATCTGTTGATCTCACTATTTTCTC…	Gadus chalcogrammus	Not mislabeled
MOBIL5844-17	BOLD-3K2F7R6A4	Ambrose University	Sept 28 2017	2017	T&T Supermarket	Grocery	Baby Ponyfish	4.99	CACCCTCTATATAGTATTTGGTGCTTGAGCAGGTATAGTCGGAACAGCTTTAAGCCTACTTATCCGAGCAGAGCTAAGCCAGCCCGGCGCTCTCTTAGGTGATGACCACATTTATAATGTTATCGTCACCGCACATGCATTTGTAATAATTTTCTTCATGGTGATGCCGATTATAATTGGAGGATTCGGCAACTGACTTATTCCCTTAATAATTGGAGCCCCTGACATAGCATTCCCCCGAATAAATAACATAAGTTTTTGACTACTTCCACCATCTTTTCTTCTACTTCTAGCATCCTCCGGAATTGAAGCTGGAGCAGGTACAGGATGAACAGTCTACCCCCCGCTAGCAGGAAACCTTGCCCATGCAGGTGCCTCTGTTGATCTAACAATTTTTTC…	Photopectoralis bindus, P. sp, Secutor insidiator, Photopectoralis cf. panayensis	Not mislabeled
MOBIL5879-17	BOLD-3K240SFI4	Ambrose University	Sept 16 2017	2017	Wal-Mart	Grocery	Tai (Red Snapper)	2.25	TTCTTCTCGCCTCATCTGGAGTCGAAGCAGGTGCCGGCACAGGATGGACTGTTTATCCCCCGCTCGCAGGCAATCTTGCCCACGCTGGACCTTCTGTTGACTTAACCATCTTCTCCCTCCACTTGGCCGGAGTGTCATCTATTTTAGGTGCAATTAATTTTATCACAACCATTATTAACATGAAACCCCCTGCCATCTCCCAATATCAAACACCCCTATTTGTGTGATCCGTCCTAATTACCGCAGTACTACTCCTTCTATCCCTGCCCGTTCTTGCCGCCGGCATCACAATACTTCTAACAGACCGAAACCTAAACACAACCTTCTTTGACCCTGCCGGAGGAGGAGACCCC	Oreochromis sp., O. niloticus, O. aureus, O. aureus x niloticus, O. mossambicus, 14 O. sp.	Product substitution
MOBIL5854-17	BOLD-3K1RPT9Y3	Ambrose University	Sept 19 2017	2017	A+ Buffet Sushi Bar	Sushi	Red Snapper	1.5	CACCCTCTATCTAGTATTTGGTGCTTGAGCCGGAATAGTAGGAACTGCACTAAGCCTCCTAATTCGGGCAGAACTAAGCCAGCCCGGCTCTCTTCTCGGAGACGACCAAATCTATAATGTAATTGTTACAGCACATGCTTTCGTAATAATTTTCTTTATAGTAATACCAATTATGATTGGAGGCTTTGGAAACTGACTAGTACCCCTCATGATTGGTGCACCAGACATGGCCTTCCCTCGAATAAATAACATGAGCTTTTGACTTCTCCCCCCCTCATTTCTTCTTCTTCTCGCCTCATCTGGAGTCGAAGCAGGTGCCGGCACAGGATGGACTGTTTATCCCCCGCTCGCAGGCAATCTTGCCCACGCTGGACCTTCTGTTGACTTAACCATCTTCTC…	Oreochromis sp., O. niloticus, O. aureus, O. aureus x niloticus, O. mossambicus, 14 O. sp.	Product substitution
MOBIL5880-17	BOLD-3K1WSZFT4	Ambrose University	Sept 20 2017	2017	Misato Sushi	Sushi	Tai - Red Snapper	2.35	CCCTCTATCTAGTATTTGGTGCTTGAGCCGGAATAGTAGGAACTGCACTAAGCCTCCTAATTCGGGCAGAACTAAGCCAGCCCGGCTCTCTTCTCGGAGACGACCAAATCTATAATGTAATTGTTACAGCACATGCTTTCGTAATAATTTTCTTTATAGTAATACCAATTATGATTGGAGGCTTTGGAAACTGACTAGTACCCCTCATGATTGGTGCACCAGACATGGCCTTCCCTCGAATAAATAACATGAGCTTTTGACTTCTCCCCCCCTCATTTCTTCTTCTTCTCGCCTCATCTGGAGTCGAAGCAGGTGCCGGCACAGGATGGACTGTTTATCCCCCGCTCGCAGGCAATCTTGCCCACGCTGGACCTTCTGTTGACTTAACCATCTTCTCCC…	Oreochromis sp., O. niloticus, O. aureus, O. aureus x niloticus, O. mossambicus, 14 O. sp.	Product substitution
MOBIL5900-17	BOLD-3K2L7BOD4	Ambrose University	Sept 20 2017	2017	Bluefin Sushi and Thai	Sushi	Red Snapper Sushi	???	CACCCTCTATCTAGTATTTGGTGCTTGAGCCGGAATAGTAGGAACTGCACTAAGCCTCCTAATTCGGGCAGAACTAAGCCAGCCCGGCTCTCTTCTCGGAGACGACCAAATCTATAATGTAATTGTTACAGCACATGCTTTCGTAATAATTTTCTTTATAGTAATACCAATTATGATTGGAGGCTTTGGAAACTGACTAGTACCCCTCATGATTGGTGCACCAGACATGGCCTTCCCTCGAATAAATAACATGAGCTTTTGACTTCTCCCCCCCTCATTTCTTCTTCTTCTCGCCTCATCTGGAGTCGAAGCAGGTGCCGGCACAGGATGGACTGTTTATCCCCCGCTCGCAGGCAATCTTGCCCACGCTGGACCTTCTGTTGACTTAACCATCTTCTC…	Oreochromis sp., O. niloticus, O. aureus, O. aureus x niloticus, O. mossambicus, 14 O. sp.	Product substitution
MOBIL5918-17	BOLD-3K24SJV99	Ambrose University	Sept 23 2017	2017	Yume Sushi	Sushi	Tai - Red Snapper	1.5	CACCCTCTATCTAGTATTTGGTGCTTGAGCCGGAATAGTAGGAACTGCACTAAGCCTCCTAATTCGGGCAGAACTAAGCCAGCCCGGCTCTCTTCTCGGAGACGACCAAATCTATAATGTAATTGTTACAGCACATGCTTTCGTAATAATTTTCTTTATAGTAATACCAATTATGATTGGAGGCTTTGGAAACTGACTAGTACCCCTCATGATTGGTGCACCAGACATGGCCTTCCCTCGAATAAATAACATGAGCTTTTGACTTCTCCCCCCCTCATTTCTTCTTCTTCTCGCCTCATCTGGAGTCGAAGCAGGTGCCGGCACAGGATGGACTGTTTATCCCCCGCTCGCAGGCAATCTTGCCCACGCTGGACCTTCTGTTGACTTAACCATCTTCTC…	Oreochromis sp., O. niloticus, O. aureus, O. aureus x niloticus, O. mossambicus, 14 O. sp.	Product substitution
MOBIL5738-17	BOLD-3K19WS4G8	Ambrose University	Sept 23 2017	2017	Sushi Ichiban	Sushi	Tai - Red Snapper	1.75	CACCCTCTATCTAGTATTTGGTGCTTGAGCCGGAATAGTAGGAACTGCACTAAGCCTCCTAATTCGGGCAGAACTAAGCCAGCCCGGCTCTCTTCTCGGAGACGACCAAATCTATAATGTAATTGTTACAGCACATGCTTTCGTAATAATTTTCTTTATAGTAATACCAATTATGATTGGAGGCTTTGGAAACTGACTAGTACCCCTCATGATTGGTGCACCAGACATGGCCTTCCCTCGAATAAATAACATGAGCTTTTGACTTCTCCCCCCCTCATTTCTTCTTCTTCTCGCCTCATCTGGAGTCGAAGCAGGTGCCGGCACAGGATGGACTGTTTATCCCCCGCTCGCAGGCAATCTTGCCCACGCTGGACCTTCTGTTGACTTAACCATCTTCTC…	Oreochromis sp., O. niloticus, O. aureus, O. aureus x niloticus, O. mossambicus, 14 O. sp.	Product substitution
MOBIL5833-17	BOLD-3K4JBI0V1	Ambrose University	Sept 27 2017	2017	Sushi Hiro Japanese Restaurant	Sushi	Tai - Red Snapper	2.75	CACCCTCTATCTAGTATTTGGTGCTTGAGCCGGAATAGTAGGAACTGCACTAAGCCTCCTAATTCGGGCAGAACTAAGCCAGCCCGGCTCTCTTCTCGGAGACGACCAAATCTATAATGTAATTGTTACAGCACATGCTTTCGTAATAATTTTCTTTATAGTAATACCAATTATGATTGGAGGCTTTGGAAACTGACTAGTACCCCTCATGATTGGTGCACCAGACATGGCCTTCCCTCGAATAAATAACATGAGCTTTTGACTTCTCCCCCCCTCATTTCTTCTTCTTCTCGCCTCATCTGGAGTCGAAGCAGGTGCCGGCACAGGATGGACTGTTTATCCCCCGCTCGCAGGCAATCTTGCCCACGCTGGACCTTCTGTTGACTTAACCATCTTCTC…	Oreochromis sp., O. niloticus, O. aureus, O. aureus x niloticus, O. mossambicus, 14 O. sp.	Product substitution
MOBIL5871-17	BOLD-3K47NODG1	Ambrose University	Sept 27 2017	2017	Sushi Hanami	Sushi	Tai - Red Snapper	1.99	TATCTAGTATTTGGTGCTTGAGCCGGAATAGTAGGAACTGCACTAAGCCTCCTAATTCGGGCAGAACTAAGCCAGCCCGGCTCTCTTCTCGGAGACGACCAAATCTATAATGTAATTGTTACAGCACATGCTTTCGTAATAATTTTCTTTATAGTAATACCAATTATGATTGGAGGCTTTGGAAACTGACTAGTACCCCTCATGATTGGTGCACCAGACATGGCCTTCCCTCGAATAAATAACATGAGCTTTTGACTTCTCCCCCCCTCATTTCTTCTTCTTCTCGCCTCATCTGGAGTCGAAGCAGGTGCCGGCACAGGATGGACTGTTTATCCCCCGCTCGCAGGCAATCTTGCCCACGCTGGACCTTCTGTTGACTTAACCATCTTCTCCCTCCAC…	Oreochromis sp., O. niloticus, O. aureus, O. aureus x niloticus, O. mossambicus, 14 O. sp.	Product substitution
MOBIL5885-17	BOLD-3K2JYAI48	Ambrose University	Sept 28 2017	2017	Sushi Sushi	Sushi	Tai (Red Snapper)	2	CACCCTCTATCTAGTATTTGGTGCTTGAGCCGGAATAGTAGGAACCGCGCTAAGCCTCCTAATTCGGGCAGAACTAAGCCAGCCCGGCTCTCTCCTCGGAGACGACCAGATTTATAATGTAATTGTTACAGCACATGCTTTTGTAATAATTTTCTTTATAGTAATGCCAATTATGATTGGAGGCTTTGGAAACTGACTAGTACCACTCATGATTGGTGCTCCAGATATGGCCTTCCCTCGAATGAACAACATGAGTTTCTGACTCCTCCCTCCCTCATTCCTCCTCCTCCTCGCCTCATCTGGAGTCGAAGCAGGTGCCGGCACAGGGTGAACTGTTTACCCCCCGCTCGCAGGCAATCTTGCCCATGCTGGGCCTTCTGTCGACTTAACCATCTTCTC…	Oreochromis niloticus, O. aureus, Tilapia zilii, O. niloticus x O. aureus, O. sp., O. massambicus	Product substitution
MOBIL5849-17	BOLD-3K1WZJ7L5	Ambrose University	Sept 20 2017	2017	Misato Sushi	Sushi	Red Tuna	3.25	TAAGCCAACCAGGTGCCCTTTTTGGGGACGACCAGATCTACAATGTAATCGTTACGGCCCATGCCTTCGTAATGATTTTCTTTATAGTAATACCAATTATGATTGGAGGATTTGGAAACTGACTTATTCCTCTAATGATCGGAGCCCCCGACATGGCATTCCCACGAATGAACAACATGAGCTTCTGACTCCTTCCCCCCTCTTTCCTTCTGCTTCTAGCTTCTTCAGGAGTTGAGGCTGGAGCCGGAACCGGTTGAACAGTCTACCCTCCCCTTGCCGGCAACCTGGCCCACGCAGGGGCATCAGTTGACCTGACTATTTTCTCACTGCACTTAGCAGGGGTTTCCTCAATTCTTGGGGCAATTAACTTCATCACAACAATTATCAATATGAAACCTG…	Thunnus obesus, sp, T. atlanticus	Semantic mislabeling
MOBIL5882-17	BOLD-3K2YL6HJ4	Ambrose University	Sept 20 2017	2017	Sho Sushi Bar and Kitchen	Sushi	Red Tuna	3.2	CACCCTTTATCTAGTATTCGGTGCATGAGCTGGAATAGTTGGCACGGCCTTAAGCTTGCTCATCCGAGCTGAACTAAGCCAACCAGGTGCCCTTCTTGGGGACGACCAGATCTACAATGTAATCGTTACGGCCCATGCCTTCGTAATGATTTTCTTTATAGTAATACCAATTATGATTGGAGGATTTGGAAACTGACTTATTCCTCTAATGATCGGGGCCCCCGACATGGCATTCCCACGAATGAACAACATGAGCTTCTGACTCCTTCCCCCCTCTTTCCTTCTGCTCCTAGCTTCTTCAGGAGTTGAGGCTGGAGCCGGAACCGGTTGAACAGTCTACCCTCCCCTTGCCGGCAACCTGGCCCACGCAGGGGCATCAGTTGACCTAACTATTTTCTC…	Thunnus albacares, T. obesus, T. atlanticus	Semantic mislabeling
MOBIL5764-17	BOLD-3K49Z0870	Ambrose University	Sept 22 2017	2017	Kabuku	Sushi	Aka Maguro - Red Tuna	7.9	CACCCTCTATCTAGTATTCGGTGCATGAGCTGGAATAGTTGGCACGGCCTTAAGCTTGCTCATCCGAGCTGAACTAAGCCAACCAGGTGCCCTTCTTGGGGACGACCAGATCTACAATGTAATCGTTACGGCCCATGCCTTCGTAATGATTTTCTTTATAGTAATACCAATTATGATTGGAGGATTTGGAAACTGACTTATTCCTCTAATGATCGGAGCCCCCGACATGGCATTCCCACGAATGAACAACATGAGCTTCTGACTCCTTCCTCCCTCTTTCCTTCTGCTCCTAGCTTCTTCAGGAGTTGAGGCTGGGGCCGGAACCGGTTGAACAGTCTACCCTCCCCTTGCCGGCAACCTAGCCCACGCAGGGGCATCAGTTGACCTAACTATTTTCTC…	Thunnus orientalis, T. thynnus, T. maccoyii, T. alalunga, T. obesus	Semantic mislabeling
MOBIL5917-17	BOLD-3K45MHUN9	Ambrose University	Sept 22 2017	2017	Haru Sushi and Grill	Sushi	Red Tuna	3.29	CACCCTTTATCTAGTATTCGGTGCATGAGCTGGAATAGTTGGCACGGCCTTAAGCTTGCTCATCCGAGCTGAACTAAGCCAACCAGGTGCCCTTCTTGGGGACGACCAGATCTACAATGTAATCGTTACGGCCCATGCCTTCGTAATGATTTTCTTTATAGTAATACCAATTATGATTGGAGGATTTGGAAACTGACTTATTCCTCTAATGATCGGAGCCCCCGACATGGCATTCCCACGAATGAACAACATGAGCTTCTGACTCCTTCCCCCCTCTTTCCTTCTGCTCCTAGCTTCTTCAGGAGTTGAGGCTGGAGCCGGAACCGGTTGAACAGTCTACCCTCCCCTTGCCGGCAACCTGGCCCACGCAGGGGCATCAGTTGACCTAACTATTTTCTC…	Thunnus albacares	Semantic mislabeling
MOBIL5932-17	BOLD-3K2475YS2	Ambrose University	Sept 23 2017	2017	Yume Sushi	Sushi	Red Tuna	9.50/4 pc	TTAAGCTTGCTCATCCGAGCTGAACTAAGCCAACCAGGTGCCCTTCTTGGGGACGACCAGATCTACAATGTAATCGTTACGGCCCATGCCTTCGTAATGATTTTCTTTATAGTAATACCAATTATGATTGGAGGATTTGGAAACTGACTTATTCCTCTAATGATCGGAGCCCCCGACATGGCATTCCCACGAATGAACAACATGAGCTTCTGACTCCTTCCCCCCTCTTTCCTTCTGCTCCTAGCTTCTTCAGGAGTTGAGGCTGGAGCCGGAACCGGTTGAACAGTCTACCCTCCCCTTGCCGGCAACCTGGCCCACGCAGGGGCATCAGTTGACCTAACTATTTTCTCACTTCACTTAGCAGGGGTTTCCTCAATTCTTGGGGCAATTAACTTCATC…	Thunnus albacares, T. atlanticus, T. obesus	Semantic mislabeling
MOBIL5760-17	BOLD-3K4QLF899	Ambrose University	Sept 27 2017	2017	Sushi Hiro	Sushi	Aka Maguro - Red Tuna	4.5	CACCCTCTATCTAGTATTTGGTGCATGAGCTGGAATAGTTGGCACGGCCTTAAGCTTGCTCATCCGAGCTGAACTAAGCCAACCAGGTGCCCTTCTTGGGGACGACCAGATCTACAATGTAATCGTTACGGCCCATGCCTTCGTAATGATTTTCTTTATAGTAATACCAATTATGATTGGAGGATTTGGAAACTGACTTATTCCTCTAATGATCGGAGCCCCCGACATGGCATTCCCACGAATGAACAACATGAGCTTCTGACTCCTTCCCCCCTCTTTCCTTCTGCTTCTAGCTTCTTCAGGAGTTGAGGCTGGAGCCGGAACCGGTTGAACAGTCTACCCTCCCCTTGCCGGCAACCTGGCCCACGCAGGGGCATCAGTTGACCTAACTATTTTCTC…	Thunnus obesus, T. albacares, T. atlanticus, 2 T. sp	Semantic mislabeling
MOBIL5868-17	BOLD-3K487YDI5	Ambrose University	Sept 27 2017	2017	Sushi Hanami	Sushi	Red Tuna	3.45	CCTTTATCTAGTATTCGGTGCATGAGCTGGAATAGTTGGCACGGCCTTAAGCTTGCTCATCCGAGCTGAACTAAGCCAACCAGGTGCCCTTCTTGGGGACGACCAGATCTACAATGTAATCGTTACGGCCCATGCCTTCGTAATGATTTTCTTTATAGTAATACCAATTATGATTGGAGGATTTGGAAACTGACTTATTCCTCTAATGATCGGAGCCCCCGACATGGCATTCCCACGAATGAACAACATGAGCTTCTGACTCCTTCCCCCCTCTTTCCTTCTGCTCCTAGCTTCTTCAGGAGTTGAGGCTGGAGCCGGAACCGGTTGAACAGTCTACCCTCCCCTTGCCGGCAACCTGGCCCACGCAGGGGCATCAGTTGACCTAACTATTTTCTCACT…	Thunnus albacares	Semantic mislabeling
MOBIL5840-17	BOLD-3K214G5M2	Ambrose University	Sept 16 2017	2017	Wal-Mart	Grocery	Salmon	8	CACCCTCTATTTAGTATTTGGTGCCTGAGCCGGGATAGTAGGCACCGCCCTAAGCCTACTAATTCGGGCAGAACTAAGCCAGCCAGGCGCTCTTCTAGGGAATGACCAGATCTATAACGTAATCGTTACAGCCCATGCCTTCGTTATGATTTTCTTTATAGTCATACCAATTATAATCGGAGGCTTTGGAAACTGATTAATCCCCCTAATGATCGGGGCACCAGATATAGCATTTCCACGAATAAACAACATAAGCTTCTGACTCCTGCCCCCATCCTTCCTCCTCCTCCTTTCTTCATCTGGAGTCGAAGCCGGCGCTGGTACCGGATGGACAGTTTATCCCCCTCTAGCCGGGAACCTTGCCCACGCAGGAGCATCCGTCGACTTAACTATCTTCTC…	Oncorhynchus gorbuscha	Product substitution
MOBIL5748-17	BOLD-3K1RYVBM8	Ambrose University	Sept 22 2017	2017	Haru Sushi Bar	Sushi	Salmon	4	TCTATTTAGTATTTGGTGCCTGAGCCGGGATAGTAGGCACCGCCCTGAGTCTACTGATTCGGGCGGAACTAAGCCAGCCGGGCGCTCTTCTGGGGGATGACCAAATCTATAACGTGATCGTCACAGCCCATGCCTTCGTTATGATTTTCTTTATAGTCATGCCAATTATAATCGGGGGCTTTGGAAACTGATTAATTCCCCTAATAATCGGAGCCCCTGATATGGCATTTCCTCGAATAAATAACATAAGCTTCTGACTCCTTCCTCCATCCTTTCTCCTCCTCCTGTCTTCATCAGGAGTTGAAGCCGGCGCGGGTACTGGATGAACAGTATACCCCCCTCTAGCCGGCAACCTCGCCCACGCAGGAGCCTCTGTTGATTTAACTATCTTCTCCCTTC…	Oncorhynchus mykiss, sp.	Product substitution
MOBIL5912-17	BOLD-3K1YP2T05	Ambrose University	Sept 12 2017	2017	Haru Sushi	Sushi	Salmon	14.99 for lunch combo	CCCAGCTATCTCTCAGTATCAAACCCCACTTTTTGTTTGAGCTGTATTAGTCACTGCCGTCCTTTTGTTACTCTCCCTCCCTGTTCTAGCAGCAGGCATTACCATACTACTTACAGACCGAAATCTAAATACCACTTTCTTTGACCCGGCAGGCGGAGGAGACCCAAT	Salmo salar	Not mislabeled
MOBIL5914-17	BOLD-3K1QHLTZ2	Ambrose University	Sept 19 2017	2017	A+ Buffet Sushi Bar	Sushi	Salmon	1.5	CACCCTCTATTTAGTATTTGGTGCCTGAGCCGGAATAGTCGGCACCGCCNTAAGTCTCTTGATTCGAGCAGAACTCAGCCAGCCTGGCGCCCTTCTGGGAGATGACCAAATTTATAACGTAATTGTTACAGCCCATGCCTTCGTCATAATTTTCTTTATAGTCATACCGATTATGATCGGCGGCTTTGGAAACTGATTAATTCCTNTTATAATCGGGGCCCCCGACATAGCATTCCCCCGAATGAATAACATAAGTTTTTGACTTCTCCCTCCCTCCTTTCTTCTCCTCCTGGCCTCATCTGGAGTTGAAGCCGGCGCTGGCACCGGATGAACAGTCTACCCCCCTCTAGCAGGTAATCTTGCCCACGCAGGAGCTTCCGTTGACTTAACTATTTTTTC…	Salmo salar	Not mislabeled
MOBIL5842-17	BOLD-3K2NY75T0	Ambrose University	Sept 20 2017	2017	Sho Sushi Bar and Kitchen	Sushi	Salmon	2	TCAATTCTTGGGGCCATTAATTTTATCACAACCATTATTAATATAAAACCCCCAGCTATCTCTCANTATCAAACCCCACTTTTTGTTTGAGCTGTATTA	Salmo salar	Not mislabeled
MOBIL5901-17	BOLD-3K2G7IOJ6	Ambrose University	Sept 20 2017	2017	Misato Sushi	Sushi	Salmon	2.5	GGCACCGGATGAACAGTCTACCCCCCTCTAGCAGGTAATCTTGCCCACGCAGGAGCTTCCGTTGACTTAACTATTTTTTCCCTCCATTTGGCTGGTATTTCTTCAATTCTTGGGGCCATTAATTTTATTACAACCATTATTAATATAAAACCCCCAGCTATCTCTCAGTATCAAACCCCACTTTTTGTTTGAGCTGTATTAGTCACNGCCGTCCTTTTGTTACTCTCCCTCCCTGTTCTAGCAGCAGGCATTACCATACTACTTACAGACCGAAATCTAAATACCACTTTCTTTGACCCGGCAGGCGG	Salmo salar	Not mislabeled
MOBIL5745-17	BOLD-3K1MTO0V7	Ambrose University	Sept 25 2017	2017	Masa Sushi	Sushi	Salmon	2.29	CCCCAGCTATCTCTCAGTATCAAACCCCACTTTTTGTTTGAGCTGTATTAGTCACTGCCGTCCTTTTGTTACTCTCCCTCCCTGTTCTAGCAGCAGGCATTACCATACTACTTACAGACCGAAATCTAAATACCACTTTCTTTGACCCGGCAGGCGGAGGAGACCCAATCTT	Salmo salar	Not mislabeled
MOBIL5886-17	BOLD-3K29YQI82	Ambrose University	Sept 27 2017	2017	Fusion Sushi	Sushi	Salmon	1.75	CACCCTCTATTTAGTATTTGGTGCCTGAGCCGGAATAGTCGGCACCGCCCTAAGTCTCTTGATTCGAGCAGAACTCAGCCAGCCTGGCGCCCTTCTGGGAGATGACCAAATTTATAACGTAATTGTTACAGCCCATGCCTTCGTCATAATTTTCTTTATAGTCATACCGATTATGATCGGCGGCTTTGGAAACTGATTAATTCCTCTTATAATCGGGGCCCCCGACATAGCATTCCCCCGAATGAATAACATAAGTTTTTGACTTCTCCCTCCCTCCTTTCTTCTCCTCCTGGCCTCATCTGGAGTTGAAGCCGGCGCTGGCACCGGATGAACAGTCTACCCCCCTCTAGCAGGTAATCTTGCCCACGCAGGAGCTTCCGTTGACTTAACTATTTTTTC…	Salmo salar	Not mislabeled
MOBIL5907-17	BOLD-3K1AW6R87	Ambrose University	Sept 28 2017	2017	Tokachi Japanese Restaurant	Sushi	Salmon	1.25	TCAGCCAGCCTGGCGCCCTTCTGGGAGATGACCAAATTTATAACGTAATTGTTACAGCCCATGCTTTCGTCATAATTTTCTTTATAGTCATACCGATTATGATCGGCGGCTTTGGAAACTGATTAATTCCTCTTATAATCGGGGCCCCCGACATAGCATTCCCCCGAATGAATAACATAAGTTTTTGACTTCTCCCTCCCTCCTTTCTTCTCCTCCTGGCCTCATCTGGAGTTGAAGCCGGCGCTGGCACCGGATGAACAGTCTACCCCCCTCTAGCAGGTAATCTTGCCCACGCAGGAGCTTCCGTTGACTTAACTATTTTTTCCCTCCATTTGGCTGGTATTTCTTCAATTCTTGGGGCCATTAATTTTATTACAACCATTATTAATATAAAACCCC…	Salmo salar	Not mislabeled
MOBIL5926-17	BOLD-3K2JB6X99	Ambrose University	Sept 28 2017	2017	Sushi Sushi	Sushi	Sake (Salmon)	2.15	CCCCAGCTATCTCTCAGTATCAAACCCCACTTTTTGTTTGAGCTGTATTAGTCACTGCCGTCCTTTTGTTACTCTCCCTCCCTGTTCTAGCAGCAGGCATTACCATACTACTTACAGACCGAAATCTAAATACCACTTTCTTTGACCCGGCAGGCGGAGGAGACCCAATC	Salmo salar	Not mislabeled
MOBIL5768-17	BOLD-3K4PQXJC6	Ambrose University	Sept 27 2017	2017	Sushi Hiro	Sushi	Salt Water Steamed Eel	3	CACCCTATATCTCGTATTTGGTGCCTGAGCCGGAATAGTCGGTACTGCACTGAGCCTTCTAATCCGTGCCGAATTAAGTCAACCAGGCGCCCTTCTTGGAGATGACCAAATTTACAATGTCATCGTCACAGCGCATGCCTTTGTAATGATTTTCTTTATAGTAATGCCAGTAATAATCGGAGGATTTGGCAACTGACTTGTACCATTAATAATCGGCGCTCCAGACATAGCGTTCCCCCGAATAAATAATATAAGCTTCTGACTTTTACCCCCATCATTTCTTCTACTACTAGCCTCCTCTGGAGTAGAGGCTGGGGCTGGTACAGGCTGAACTGTATATCCACCCCTGGCTGGAAACTTAGCCCACGCCGGAGCATCTGTTGACCTGACAATTTTCTC…	Anguilla rostrata	Invalid market name
MOBIL5762-17	BOLD-3K4QHLE14	Ambrose University	Sept 27 2017	2017	Sushi Hiro	Sushi	Suzuki - Sea Bass	2.75	TATTTAGTATTTGGTGCCTGAGCCGGGATAGTAGGCACCGCCCTGAGCCTAGTAATTCGGGCAGAACTAAGCCAGCCAGGCGCTCTTCTAGGGGATGACCAGATCTACAACGTAATCGTTACAGCCCATGCCTTCGTTATAATTTTCTTTATAGTCATACCAATTATAATCGGAGGCTTTGGAAACTGATTAATCCCCCTAATGATCGGGGCACCAGATATAGCATTCCCACGAATAAATAACATAAGCTTCTGACTCCTNCCTCCNTCCTTCCTCCTCCTCCTTTCTTCATCTGGAGTTGAAGCCGGCGCTGGTACCGGGTGGACAGTTTACCCNCCTCTAGCCGGAAACCTTGCCCACGCAGGAGCATCTGTCGACTTAACCATCTTCTCCCTCCAT…	Oncorhynchus keta	Product substitution
MOBIL5735-17	BOLD-3K18WAFP2	Ambrose University	Sept 23 2017	2017	Sushi Ichiban	Sushi	Anago - Sea Eel (smoked)	2.6	TGGGGGACGACCAAATTTATAATGTCATTGTTACGGCGCATGCCTTTGTAATAATTTTCTTTATAGTAATGCCAGTTATAATTGGAGGATTTGGTAATTGACTAGTGCCATTAATAATTGGGGCCCCCGATATAGCATTCCCACGAATAAATAACATAAGCTTCTGACTTCTTCCCCCATCATTTTTACTTTTACTAGCCTCTTCCGGAGTTGAGGCCGGGGCAGGTACAGGATGAACTGTATACCCGCCCTTAGCTGGAAACCTAGCTCACGCTGGCGCTTCTGTTGACCTGACAATCTTCTCTCTTCACCTTGCCGGAGTTTCGTCAATCCTGGGGGCAATTAACTTTATTACTACAATTATTAATATAAAACCCCCAGCAATTACACAATACCAAA…	Ophichthus remiger	Invalid market name
MOBIL5924-17	BOLD-3K2IRMWX7	Ambrose University	Sept 28 2017	2017	Sushi Sushi	Sushi	Katsuo (Skipjack Tuna)	3	CACCCTTTATCTAGTATTCGGTGCATGAGCTGGTATAGTTGGCACGGCCTTAAGCTTGCTCATCCGAGCTGAACTAAGCCAACCAGGTGCCCTTCTTGGGGACGACCAGATCTACAATGTAATCGTTACGGCCCATGCCTTCGTAATGATTTTCTTTATAGTAATGCCAATTATGATTGGAGGGTTTGGAAACTGACTCATCCCTCTAATGATCGGGGCTCCAGACATGGCATTCCCTCGAATGAACAACATGAGCTTCTGACTTCTTCCTCCATCTTTCCTTCTACTACTAGCTTCTTCAGGAGTTGAAGCTGGTGCTGGAACAGGTTGAACAGTTTACCCTCCCCTTGCCGGTAACCTGGCTCACGCCGGAGCATCTGTTGACCTAACTATTTTCTC…	Katsuwonus pelamis	Not mislabeled
MOBIL5846-17	BOLD-3K1Q206M4	Ambrose University	Sept 17 2017	2017	Fusion Sushi	Sushi	Snapper Sashimi	5.5/3 pc	CACCCTCTATCTAGTATTTGGTGCTTGAGCCGGAATAGTAGGAACTGCACTAAGCCTCCTAATTCGGGCAGAACTAAGCCAGCCCGGCTCTCTTCTCGGAGACGACCAAATCTATAATGTAATTGTTACAGCACATGCTTTCGTAATAATTTTCTTTATAGTAATACCAATTATGATTGGAGGCTTTGGAAACTGACTAGTACCCCTCATGATTGGTGCACCAGACATGGCCTTCCCTCGAATAAATAACATGAGCTTTTGACTTCTCCCCCCCTCATTTCTTCTTCTTCTCGCCTCATCTGGAGTCGAAGCAGGTGCCGGCACAGGATGGACTGTTTATCCCCCGCTCGCAGGCAATCTTGCCCACGCTGGACCTTCTGTTGACTTAACCATCTTCTC…	Oreochromis sp., O. niloticus, O. aureus, O. aureus x niloticus, O. mossambicus, 14 O. sp.	Product substitution
MOBIL5863-17	BOLD-3K45YXBW1	Ambrose University	Sept 22 2017	2017	Haru Sushi and Grill	Sushi	Tai - Snapper	2.29	CACCCTCTATCTAGTATTTGGTGCTTGAGCCGGAATAGTAGGAACTGCACTAAGCCTCCTAATTCGGGCAGAACTAAGCCAGCCCGGCTCTCTTCTCGGAGACGACCAAATCTATAATGTAATTGTTACAGCACATGCTTTCGTAATAATTTTCTTTATAGTAATACCAATTATGATTGGAGGCTTTGGAAACTGACTAGTACCCCTCATGATTGGTGCACCAGACATGGCCTTCCCTCGAATAAATAACATGAGCTTTTGACTTCTCCCCCCCTCATTTCTTCTTCTTCTCGCCTCATCTGGAGTCGAAGCAGGTGCCGGCACAGGATGGACTGTTTATCCCCCGCTCGCAGGCAATCTTGCCCACGCTGGACCTTCTGTTGACTTAACCATCTTCTC…	Oreochromis sp., O. niloticus, O. aureus, O. aureus x niloticus, O. mossambicus, 14 O. sp.	Product substitution
MOBIL5852-17	BOLD-3K2A4N9V7	Ambrose University	Sept 27 2017	2017	Fusion Sushi	Sushi	Snapper	1.75	TAATTCGGGCAGAACTAAGCCAGCCCGGCTCTCTTCTCGGAGACGACCAAATCTATAATGTAATTGTTACAGCACATGCTTTCGTAATAATTTTCTTTATAGTAATACCAATTATGATTGGAGGCTTTGGAAACTGACTAGTACCCCTCATGATTGGTGCACCAGACATGGCCTTCCCTCGAATAAATAACATGAGNTTTTGACTTCTCCCCCCCTCATTTCTTCTTCTTCTCGCCTCATCTGGAGTNGAAGCAGGTGCCGGCACAGGATGGACTGTTTATCCCCCGCTCGCAGGCAATCTTGCCCACGCTGGACCTTCTGTTGACTTAACCATCTTCTCCCTCCACTTGGCCGGAGTGTCATCTATTTTAGGTGCAATTAATTTTATCACAACCATTA…	Oreochromis sp., O. niloticus, O. aureus, O. aureus x niloticus, O. mossambicus, 14 O. sp.	Product substitution
MOBIL5883-17	BOLD-3K15QXHZ9	Ambrose University	Sept 19 2017	2017	Real Canadian Superstore	Grocery	Wild Sockeye Salmon Fillet	5.37	CACCCTCTATTTAGTATTTGGTGCCTGAGCCGGGATAGTCGGCACCGCCCTAAGCCTACTGATTCGGGCAGAACTAAGCCAGCCAGGCGCTCTTCTAGGAGATGACCAGATCTATAACGTAATCGTCACAGCCCATGCCTTCGTTATGATTTTCTTTATAGTCATACCAATTATAATCGGAGGATTTGGAAACTGATTAATCCCTCTAATAATCGGAGCCCCCGATATGGCATTCCCACGAATAAATAACATAAGCTTCTGACTCCTCCCCCCCTCGTTTCTCCTCCTCCTATCTTCATCTGGAGTTGAAGCCGGCGCTGGTACCGGATGAACAGTTTATCCCCCTCTGGCCGGAAACCTTGCCCACGCGGGAGCCTCTGTTGACTTAACCATCTTCTC…	Oncorhynchus nerka	Not mislabeled
MOBIL5895-17	BOLD-3K2Y9ELS6	Ambrose University	Sept 20 2017	2017	Sho Sushi Bar and Kitchen	Sushi	Sockeye Salmon Wild	2.2	CACCCTCTATTTAGTATTTGGTGCCTGAGCCGGGATAGTCGGCACCGCCCTAAGCCTACTGATTCGGGCAGAACTAAGCCAGCCAGGCGCTCTTCTAGGAGATGACCAGATCTATAACGTAATCGTCACAGCCCATGCCTTCGTTATGATTTTCTTTATAGTCATACCAATTATAATCGGAGGATTTGGAAACTGATTAATCCCCCTAATAATCGGAGCCCCCGATATGGCATTCCCACGAATAAATAACATAAGCTTCTGACTCCTCCCCCCCTCGTTTCTCCTCCTCCTATCTTCATCTGGAGTTGAAGCCGGCGCTGGTACCGGATGAACAGTTTATCCCCCTCTGGCCGGAAACCTTGCCCACGCTGGAGCCTCTGTTGACTTAACCATCTTCTC…	Oncorhynchus nerka	Not mislabeled
MOBIL5763-17	BOLD-3K4AHYQV7	Ambrose University	Sept 22 2017	2017	Kabuku	Sushi	Beni Sake - Wild Sockeye Salmon	3.6	CACCCTCTATTTAGTATTTGGTGCCTGAGCCGGGATAGTCGGCACCGCCCTAAGCCTACTGATTCGGGCAGAACTAAGCCAGCCAGGCGCTCTTCTAGGAGATGACCAGATCTATAACGTAATCGTCACAGCCCATGCCTTCGTTATGATTTTCTTTATAGTCATGCCAATTATAATCGGAGGATTTGGAAACTGATTAATCCCTCTAATAATCGGAGCCCCCGATATGGCATTCCCACGAATAAATAACATAAGCTTCTGACTCCTCCCCCCCTCGTTTCTCCTCCTCCTATCTTCATCTGGAGTTGAAGCCGGCGCTGGTACCGGATGAACAGTTTATCCCCCTCTGGCCGGAAACCTTGCCCACGCGGGAGCCTCTGTTGACTTAACCATCTTCTC…	Oncorhynchus nerka	Not mislabeled
MOBIL5875-17	BOLD-3K2W5RE76	Ambrose University	Sept 23 2017	2017	Real Canadian Superstore	Grocery	Sockeye Salmon - Wild Red Pacific	3.18	CCCCAGCCATCTCTCAGTACCAGACCCCACTTTTTGTTTGAGCTGTGCTAATCACTGCTGTACTTCTACTACTCTCCCTCCCCGTCCTAGCAGCAGGCATTACTATGTTACTTACTGACCGAAATTTAAACACCACTTTCTTTGACCCGGCAGGCGGGGGTGATCCGATTT	Oncorhynchus nerka	Not mislabeled
MOBIL5902-17	BOLD-3K279AQB3	Ambrose University	Sept 28 2017	2017	Wal-Mart	Grocery	Wild Sockeye Salmon Fillet	28.59/kg	CACCCTCTATTTAGTATTTGGTGCCTGAGCCGGGATAGTCGGCACCGCCCTAAGCCTACTGATTCGGGCAGAACTAAGCCAGCCAGGCGCTCTTCTAGGAGATGACCAGATCTATAACGTAATCGTCACAGCCCATGCCTTCGTTATGATTTTCTTTATAGTCATACCAATTATAATCGGAGGATTTGGAAACTGATTAATCCCCCTAATAATCGGAGCCCCCGATATGGCATTCCCACGAATAAATAACATAAGCTTCTGACTCCTCCCCCCCTCGTTTCTCCTCCTCCTATCTTCATCTGGAGTTGAAGCCGGCGCTGGTACCGGATGAACAGTTTATCCCCCTCTGGCCGGAAACCTTGCCCACGCGGGAGCCTCTGTTGACTTAACCATCTTCTC…	Oncorhynchus nerka	Not mislabeled
MOBIL5894-17	BOLD-3K2EB0JA9	Ambrose University	Sept 28 2017	2017	T&T Supermarket	Grocery	Wild Sole Fillet	4.31	CACCCTCTATCTCGTATTTGGTGCCTGAGCCGGAATAGTGGGCACAGGCCTAAGTCTGCTTATTCGAGCAGAACTAAGCCAACCTGGGGCTCTCCTAGGAGACGACCAAATTTATAACGTAATCGTCACCGCACACGCCTTTGTAATAATCTTTTTTATAGTAATACCCATTATGATTGGGGGCTTTGGAAACTGACTTATCCCCTTAATAATTGGGGCCCCTGACATAGCGTTCCCCCGAATAAATAACATGAGTTTCTGACTCCTTCCCCCATCCTTTCTGCTACTCCTAGCCTCTTCAGGTGTTGAAGCAGGGGCAGGTACTGGGTGAACCGTGTACCCCCCACTAGCTGGCAATCTAGCCCATGCTGGAGCATCTGTAGACCTAACAATCTTCTC…	Microstomus pacificus	Not mislabeled
MOBIL5906-17	BOLD-3K29TMQZ3	Ambrose University	Sept 28 2017	2017	Calgary Coop	Grocery	Sole Fillets Fresh/Wild	19.90/kg	GGAAACTGACTTATCCCCTTAATAATTGGGGCCCCTGACATAGCGTTCCCCNGAATAAATAACATGAGTTTNTGACTCCTTCCCCCATCCTTTCTGCTACTCCTAGCCTCTTCAGGTGTTGAAGCAGGGGCAGGTACTGGGTGAACCGTGTACCCCCCACTAGCTGGCAATCTAGCCCATGNTGGAGCATNTGTAGACCTAACAATCTTCTCACTACACCTNGCAGGTATCTCCTCAATTCTGGGAGCTATCAACTTTATCACCACCATTATTAACATGAAACCTGCAACAGTGACCATGTACCAAATCCCATTATTTGTNTGAGNTGTTTTAATTACCGCTGTCCTCCTCCTCNTATCACTTCCGGTNTTAGCCGCTGGGATCACGATGTTATTAACA…	Microstomus pacificus	Not mislabeled
MOBIL5931-17	BOLD-3K2408YH8	Ambrose University	Sept 16 2017	2017	Wal-Mart	Grocery	Tilapia fillet	6	CACCCTCTATCTAGTATTTGGTGCTTGAGCCGGAATAGTAGGAACTGCATTAAGCCTCCTAATTCGGGCAGAACTAAGCCAGCCCGGCTCTCTCCTCGGAGACGACCAGATTTATAATGTAATTGTTACAGCACATGCTTTCGTAATAATTTTCTTTATAGTAATGCCAATTATAATTGGAGGTTTTGGAAACTGACTAGTGCCACTAATGATTGGTGCACCAGACATGGCCTTCCCTCGAATAAATAACATGAGTTTTTGACTCCTCCCCCCCTCATTTCTCCTTCTCCTCGCCTCATCCGGGGTCGAAGCAGGGGCCGGTACAGGATGGACTGTTTATCCCCCACTCGCAGGCAATCTCGCCCATGCTGGGCCTTCCGTTGACTTAACCATCTTCTC…	Oreochromis mossambicus, O. sp., O. niloticus, 42 Oreochromis sp, O. aureux x O. niloticus, O. mossambicus x O. niloticus	Not mislabeled
MOBIL5751-17	BOLD-3K2TJQB76	Ambrose University	Sept 26 2017	2017	Real Canadian Superstore	Grocery	Fresh RSC Tilapia Fillets	4.88	CACCCTCTATCTAGTATTTGGTGCTTGAGCCGGAATAGTAGGAACTGCATTAAGCCTCCTAATTCGGGCAGAACTAAGCCAGCCCGGCTCTCTCCTCGGAGACGACCAGATTTATAATGTAATTGTTACAGCACATGCTTTCGTAATAATTTTCTTTATAGTAATGCCAATTATAATTGGAGGTTTTGGAAACTGACTAGTGCCACTAATGATTGGTGCACCAGACATGGCCTTCCCTCGAATAAATAACATGAGTTTTTGACTCCTCCCCCCCTCATTTCTCCTTCTCCTCGCCTCATCCGGGGTCGAAGCAGGGGCCGGTACAGGATGGACTGTTTATCCCCCACTCGCAGGCAATCTCGCCCATGCTGGGCCTTCCGTTGACTTAACCATCTTCTC…	Oreochromis mossambicus, O. sp., O. niloticus, 42 Oreochromis sp, O. aureux x O. niloticus, O. mossambicus x O. niloticus	Not mislabeled
MOBIL5876-17	BOLD-3K1ZOIE81	Ambrose University	Sept 12 2017	2017	Haru Sushi	Sushi	Tuna	14.99 for lunch combo	CACCCTCTATCTAGTATTCGGTGCATGAGCTGGAATAGTTGGCACGGCCTTAAGCTTGCTCATCCGAGCTGAACTAAGCCAACCAGGTGCCCTTCTTGGGGACGACCAGATCTACAATGTAATCGTTACGGCCCATGCCTTCGTAATGATTTTCTTTATAGTAATACCAATTATGATTGGAGGATTTGGAAACTGACTTATTCCTCTAATGATCGGAGCCCCCGACATGGCATTCCCACGAATGAACAACATGAGCTTCTGACTCCTTCCTCCCTCTTTCCTTCTGCTCCTAGCTTCTTCAGGAGTTGAGGCTGGGGCCGGAACCGGTTGAACAGTCTACCCTCCCCTTGCCGGCAACCTAGCCCACGCAGGGGCATCAGTTGACCTAACTATTTTCTC…	Thunnus alalunga, T. obesus, T. orientalis, T. thynnus	Not mislabeled
MOBIL5859-17	BOLD-3K1PD7AX7	Ambrose University	Sept 17 2017	2017	Fusion Sushi	Sushi	Tuna Sashimi	5.95/3 pc	CACCCTCTATCTAGTATTCGGTGCATGAGCTGGAATAGTTGGCACGGCCTTAAGCTTGCTCATCCGAGCTGAACTAAGCCAACCAGGTGCCCTTCTTGGGGACGACCAGATCTACAATGTAATCGTTACGGCCCATGCCTTCGTAATGATTTTCTTTATAGTAATACCAATTATGATTGGAGGATTTGGAAACTGACTTATTCCTCTAATGATCGGAGCCCCCGACATGGCATTCCCACGAATGAACAACATGAGCTTCTGACTCCTTCCTCCCTCTTTCCTTCTGCTCCTAGCTTCTTCAGGAGTTGAGGCTGGGGCCGGAACCGGTTGAACAGTCTACCCTCCCCTTGCCGGCAACCTAGCCCACGCAGGGGCATCAGTTGACCTAACTATTTTCTC…	Thunnus alalunga, T. obesus, T. orientalis, T. thynnus	Not mislabeled
MOBIL5936-17	BOLD-3K1RANZO0	Ambrose University	Sept 19 2017	2017	A+ Buffet Sushi Bar	Sushi	Tuna	1.5	CACCCTCTATCTAGTATTCGGTGCATGAGCTGGAATAGTTGGCACGGCCTTAAGCTTGCTCATCCGAGCTGAACTAAGCCAACCAGGTGCCCTTCTTGGGGACGACCAGATCTACAATGTAATCGTTACGGCCCATGCCTTCGTAATGATTTTCTTTATAGTAATACCAATTATGATTGGAGGATTTGGAAACTGACTTATTCCTCTAATGATCGGAGCCCCCGACATGGCATTCCCACGAATGAACAACATGAGCTTCTGACTCCTTCCTCCCTCTTTCCTTCTGCTCCTAGCTTCTTCAGGAGTTGAGGCTGGGGCCGGAACCGGTTGAACAGTCTACCCTCCCCTTGCCGGCAACCTAGCCCACGCAGGGGCATCAGTTGACCTAACTATTTTCTC…	Thunnus alalunga, T. obesus, T. orientalis, T. thynnus	Not mislabeled
MOBIL5861-17	BOLD-3K2GRTBL4	Ambrose University	Sept 20 2017	2017	Misato Sushi	Sushi	Toro - Tuna Belly	3.25	TGAACTAAGCCAACCAGGTGCCCTTCTTGGGGACGACCAGATCTACAATGTAATCGTTACGGCCCATGCCTTCGTAATGATTTTCTTTATAGTAATACCAATTATGATTGGAGGATTTGGAAACTGACTTATTCCTCTAATGATCGGAGCCCCCGACATGGCATTCCCACGAATGAACAACATGAGCTTCTGACTCCTTCCTCCCTCTTTCCTTCTGCTCCTAGCTTCTTCAGGAGTTGAGGCTGGGGCCGGAACCGGTTGAACAGTCTACCCTCCCCTTGCCGGCAACCTAGCCCACGCAGGGGCATCAGTTGACCTAACTATTTTCTCACTTCACTTAGCAGGGGTTTCCTCAATTCTTGGGGCAATTAACTTCATTACAACAATTATCAATATGAA…	Thunnus alalunga, T. obesus, T. orientalis	Not mislabeled
MOBIL5923-17	BOLD-3K2NQVW62	Ambrose University	Sept 20 2017	2017	Sho Sushi Bar and Kitchen	Sushi	Tuna	2	CACCCTCTATCTAGTATTCGGTGCATGAGCTGGAATAGTTGGCACGGCCTTAAGCTTGCTCATCCGAGCTGAACTAAGCCAACCAGGTGCCCTTCTTGGGGACGACCAGATCTACAATGTAATCGTTACGGCCCATGCCTTCGTAATGATTTTCTTTATAGTAATACCAATTATGATTGGAGGATTTGGAAACTGACTTATTCCTCTAATGATCGGAGCCCCCGACATGGCATTCCCACGAATGAACAACATGAGCTTCTGACTCCTTCCTCCCTCTTTCCTTCTGCTCCTAGCTTCTTCAGGAGTTGAGGCTGGGGCCGGAACCGGTTGAACAGTCTACCCTCCCCTTGCCGGCAACCTAGCCCACGCAGGGGCATCAGTTGACCTAACTATTTTCTC…	Thunnus alalunga, T. obesus, T. orientalis, T. thynnus	Not mislabeled
MOBIL5864-17	BOLD-3K2LS5C67	Ambrose University	Sept 20 2017	2017	Bluefin Sushi and Thai	Sushi	Tuna Sushi	5.59/pc	CACCCTCTATCTAGTATTCGGTGCATGAGCTGGAATAGTTGGCACGGCCTTAAGCTTGCTCATCCGAGCTGAACTAAGCCAACCAGGTGCCCTTCTTGGGGACGACCAGATCTACAACGTAATCGTTACGGCCCATGCCTTCGTAATGATTTTCTTTATAGTAATACCAATTATGATTGGAGGATTTGGAAACTGACTTATTCCTCTAATGATCGGAGCCCCCGACATGGCATTCCCACGAATGAACAACATGAGCTTCTGACTCCTTCCTCCCTCTTTCCTTCTGCTCCTAGCTTCTTCAGGAGTTGAGGCTGGGGCCGGAACCGGTTGAACAGTCTACCCTCCCCTTGCCGGCAACCTAGCCCACGCAGGGGCATCAGTTGACCTAACTATTTTCTC…	Thunnus alalunga, T. obesus, T. orientalis, T. thynnus	Not mislabeled
MOBIL5881-17	BOLD-3K1XCSGU9	Ambrose University	Sept 20 2017	2017	Misato Sushi	Sushi	Tuna	2.5	CACCCTCTATCTAGTATTCGGTGCATGAGCTGGAATAGTTGGCACGGCCTTAAGCTTGCTCATCCGAGCTGAACTAAGCCAACCAGGTGCCCTTCTTGGGGACGACCAGATCTACAATGTAATCGTTACGGCCCATGCCTTCGTAATGATTTTCTTTATAGTAATACCAATTATGATTGGAGGATTTGGAAACTGACTTATTCCTCTAATGATCGGAGCCCCCGACATGGCATTCCCACGAATGAACAACATGAGCTTCTGACTCCTTCCTCCCTCTTTCCTTCTGCTCCTAGCTTCTTCAGGAGTTGAGGCTGGGGCCGGAACCGGTTGAACAGTCTACCCTCCCCTTGCCGGCAACCTAGCCCACGCAGGGGCATCAGTTGACCTAACTATTTTCTC…	Thunnus alalunga, T. obesus, T. orientalis, T. thynnus,	Not mislabeled
MOBIL5747-17	BOLD-3K1RTJIH3	Ambrose University	Sept 22 2017	2017	Haru Sushi Bar	Sushi	Tuna	4	CACCCTCTATCTAGTATTCGGTGCATGAGCTGGAATAGTTGGCACGGCCTTAAGCTTGCTCATCCGAGCTGAACTAAGCCAACCAGGTGCCCTTCTTGGGGACGACCAGATCTACAATGTAATCGTTACGGCCCATGCCTTCGTAATGATTTTCTTTATAGTAATACCAATTATGATTGGAGGATTTGGAAACTGACTTATTCCTCTAATGATCGGAGCCCCCGACATGGCATTCCCACGAATGAACAACATGAGCTTCTGACTCCTTCCTCCCTCTTTCCTTCTGCTCCTAGCTTCTTCAGGAGTTGAGGCTGGGGCCGGAACCGGTTGAACAGTCTACCCTCCCCTTGCCGGCAACCTAGCCCACGCAGGGGCATCAGTTGACCTAACTATTTTCTC…	Thunnus alalunga, T. obesus, T. orientalis, T. thynnus	Not mislabeled
MOBIL5779-17	BOLD-3K40BJ1H6	Ambrose University	Sept 23 2017	2017	Sushi Ichiban	Sushi	Maguro - Tuna	1.8	CACCCTCTATCTAGTATTCGGTGCATGAGCTGGAATAGTTGGCACGGCCTTAAGCTTGCTCATCCGAGCTGAACTAAGCCAACCAGGTGCCCTTCTTGGGGACGACCAGATCTACAATGTAATCGTTACGGCCCATGCCTTCGTAATGATTTTCTTTATAGTAATACCAATTATGATTGGAGGATTTGGAAACTGACTTATTCCTCTAATGATCGGAGCCCCCGACATGGCATTCCCACGAATGAACAACATGAGCTTCTGACTCCTTCCTCCCTCTTTCCTTCTGCTCCTAGCTTCTTCAGGAGTTGAGGCTGGGGCCGGAACCGGTTGAACAGTCTACCCTCCCCTTGCCGGCAACCTAGCCCACGCAGGGGCATCAGTTGACCTAACTATTTTCTC…	Thunnus alalunga, T. obesus, T. orientalis, T. thynnus	Not mislabeled
MOBIL5778-17	BOLD-3K2E64QA6	Ambrose University	Sept 25 2017	2017	Haru Sushi	Sushi	Tuna avocado roll	6.29	CACCCTCTATCTAGTATTCGGTGCATGAGCTGGAATAGTTGGCACGGCCTTAAGCTTGCTCATCCGAGCTGAACTAAGCCAACCAGGTGCCCTTCTTGGGGACGACCAGATCTACAATGTAATCGTTACGGCCCATGCCTTCGTAATGATTTTCTTTATAGTAATACCAATTATGATTGGAGGATTTGGAAACTGACTTATTCCTCTAATGATCGGAGCCCCCGACATGGCATTCCCACGAATGAACAACATGAGCTTCTGACTCCTTCCTCCCTCTTTCCTTCTGCTCCTAGCTTCTTCAGGAGTTGAGGCTGGGGCCGGAACCGGTTGAACAGTCTACCCTCCCCTTGCCGGCAACCTAGCCCACGCAGGGGCATCAGTTGACCTAACTATTTTCTC…	Thunnus alalunga, T. obesus, T. orientalis, T. thynnus	Not mislabeled
MOBIL5888-17	BOLD-3K4FQ0IC7	Ambrose University	Sept 25 2017	2017	Real Canadian Superstore	Grocery	Makisushi Nigiri Combo (Tuna - not labeled)	9.99/8pc	CACCCTTTATCTAGTATTCGGTGCATGAGCTGGAATAGTTGGCACGGCCTTAAGCTTGCTCATCCGAGCTGAACTAAGCCAACCAGGTGCCCTTCTTGGGGACGACCAGATCTACAATGTAATCGTTACGGCCCATGCCTTCGTAATGATTTTCTTTATAGTAATACCAATTATGATTGGAGGATTTGGAAACTGACTTATTCCTCTAATGATCGGAGCCCCCGACATGGCATTCCCACGAATGAACAACATGAGCTTCTGACTCCTTCCCCCCTCTTTCCTTCTGCTCCTAGCTTCTTCAGGAGTTGAGGCTGGAGCCGGAACCGGTTGAACAGTCTACCCTCCCCTTGCCGGCAACCTGGCCCACGCAGGGGCATCAGTTGACCTAACTATTTTCTC…	Thunnus albacares	Not mislabeled
MOBIL5761-17	BOLD-3K4QEYB60	Ambrose University	Sept 27 2017	2017	Gyu-Kaku	Sushi	Tuna	2.5	CACCCTCTATCTAGTATTCGGTGCATGAGCTGGAATAGTTGGCACGGCCTTAAGCTTGCTCATCCGAGCTGAACTAAGCCAACCAGGTGCCCTTCTTGGGGACGACCAGATCTACAATGTAATCGTTACGGCCCATGCCTTCGTAATGATTTTCTTTATAGTAATACCAATTATGATTGGAGGATTTGGAAACTGACTTATTCCTCTAATGATCGGAGCCCCCGACATGGCATTCCCACGAATGAACAACATGAGCTTCTGACTCCTTCCTCCCTCTTTCCTTCTGCTCCTAGCTTCTTCAGGAGTTGAGGCTGGGGCCGGAACCGGTTGAACAGTCTACCCTCCCCTTGCCGGCAACCTAGCCCACGCAGGGGCATCAGTTGACCTAACTATTTTCTC…	Thunnus alalunga, T. obesus, T. orientalis, T. thynnus	Not mislabeled
MOBIL5910-17	BOLD-3K1ACURX8	Ambrose University	Sept 27 2017	2017	Fusion Sushi	Sushi	Tuna	1.75	CACCCTCTATCTAGTATTCGGTGCATGAGCTGGAATAGTTGGCACGGCCTTAAGCTTGCTCATCCGAGCTGAACTAAGCCAACCAGGTGCCCTTCTTGGGGACGACCAGATCTACAATGTAATCGTTACGGCCCATGCCTTCGTAATGATTTTCTTTATAGTAATACCAATTATGATTGGAGGATTTGGAAACTGACTTATTCCTCTAATGATCGGAGCCCCCGACATGGCATTCCCACGAATGAACAACATGAGCTTCTGACTCCTTCCTCCCTCTTTCCTTCTGCTCCTAGCTTCTTCAGGAGTTGAGGCTGGGGCCGGAACCGGTTGAACAGTCTACCCTCCCCTTGCCGGCAACCTAGCCCACGCAGGGGCATCAGTTGACCTAACTATTTTCTC…	Thunnus alalunga, T. obesus, T. orientalis, T. thynnus	Not mislabeled
MOBIL5850-17	BOLD-3K2CBO7U1	Ambrose University	Sept 28 2017	2017	Tokachi Japanese Restaurant	Sushi	Tuna	1.25	CACCCTCTATCTAGTATTCGGTGCATGAGCTGGAATAGTTGGCACGGCCTTAAGCTTGCTCATCCGAGCTGAACTAAGCCAACCAGGTGCCCTTCTTGGGGACGACCAGATCTACAATGTAATCGTTACGGCCCATGCCTTCGTAATGATTTTCTTTATAGTAATACCAATTATGATTGGAGGATTTGGAAACTGACTTATTCCTCTAATGATCGGAGCCCCCGACATGGCATTCCCACGAATGAACAACATGAGCTTCTGACTCCTTCCTCCCTCTTTCCTTCTGCTCCTAGCTTCTTCAGGAGTTGAGGCTGGGGCCGGAACCGGTTGAACAGTCTACCCTCCCCTTGCCGGCAACCTAGCCCACGCAGGGGCATCAGTTGACCTAACTATTTTCTC…	Thunnus alalunga, T. obesus, T. orientalis, T. thynnus	Not mislabeled
MOBIL5710-17	BOLD-3K2WMFGT2	Ambrose University	Sept 28 2017	2017	T and T Supermarket	Grocery	Fresh White Bass Fish	5.99/lb	CACCCTATATCTAGTGTTTGGCGCTTGAGCTGGTATAGTGGGCACTGCTCTAAGTCTTCTTATTCGAGCAGAGCTAAGCCAACCGGGCGCCCTCCTTGGGGATGACCAAATCTACAACGTAATCGTTACCGCACATGCATTTGTAATGATCTTTTTTATAGTAATACCAATCATGATCGGAGGATTCGGAAACTGACTTATTCCACTAATAATTGGAGCACCTGATATAGCATTCCCCCGAATGAACAACATAAGTTTTTGACTACTTCCCCCATCCTTCCTTCTCCTCTTGGCTTCTTCAGGCGTCGAAGCCGGGGCTGGGACTGGCTGAACCGTCTATCCCCCCCTTGCAAGCAACCTTGCACACGCAGGTGCATCTGTAGACTTAACAATTTTTTC…	Morone chrysops, M. saxatilis x M. chrysops, M. saxatilis	Not mislabeled
MOBIL5712-17	BOLD-3K2WOJ8Z3	Ambrose University	Sept 28 2017	2017	T and T Supermarket	Grocery	Frozen Small Yellow Croaker	4.99	CACCCTCTATCTAATTTTTGGTGCATGAGCCGGAATAGTGGGCACCGGCCTAAGTCTCATTATTCGAGCAGAGCTAAGCCAGCCCGGCTCGCTTCTCGGAGACGACCAGATTTTTAACGTAGTTGTTACGGCACATGCCTTCGTTATAATCTTCTTTATAGTAATACCCGTAATAATCGGAGGGTTCGGAAACTGACTCGTGCCTTTAATAATTGGCGCCCCCGACATAGCATTTCCCCGAATAAATAACATAAGCTTCTGACTTATCCCCCCTGCTTTCATTATGCTCGCGGCCTCATCAGCGGTTGAAGCAGGGGCCGGAACAGGGTGAACAGTCTACCCCCCACTTGCTGGAAACCTCGCACACGCAGGAGCTTCAGTCGACTTAGCCATTTTCGC…	Larimichthys polyactis	Not mislabeled
MOBIL5750-17	BOLD-3K1TA2IN6	Ambrose University	Sept 22 2017	2017	Haru Sushi Bar	Sushi	Hamachi - Yellow Tail	4	CACCCTCTATCTAGTATTTGGTGCTTGAGCCGGAATAGTAGGAACTGCACTAAGCCTCCTAATTCGGGCAGAACTAAGCCAGCCCGGCTCTCTTCTCGGAGACGACCAAATCTATAATGTAATTGTTACAGCACATGCTTTCGTAATAATTTTCTTTATAGTAATACCAATTATGATTGGAGGCTTTGGAAACTGACTAGTACCCCTCATGATTGGTGCACCAGACATGGCCTTCCCTCGAATAAATAACATGAGCTTTTGACTTCTCCCCCCCTCATTTCTTCTTCTTCTCGCCTCATCTGGAGTCGAAGCAGGTGCCGGCACAGGATGGACTGTTTATCCCCCGCTCGCAGGCAATCTTGCCCACGCTGGACCTTCTGTTGACTTAACCATCTTCTC…	Oreochromis sp., O. niloticus, O. aureus, O. aureus x niloticus, O. mossambicus, 14 O. sp.	Product substitution
MOBIL5843-17	BOLD-3K4FAC5U2	Ambrose University	Sept 25 2017	2017	Real Canadian Superstore	Grocery	Makisushi Nigiri Combo (Salmon - not labeled)	9.99/8pc	CACCCTCTATTTAGTATTTGGTGCCTGAGCCGGGATAGTAGGCACCGCCCTGAGTCTACTGATTCGGGCGGAACTAAGCCAGCCGGGCGCTCTTCTGGGGGATGACCAAATCTATAACGTGATCGTCACAGCCCATGCCTTCGTTATGATTTTCTTTATAGTCATGCCAATTATAATCGGGGGCTTTGGAAACTGATTAATTCCCCTAATAATCGGAGCCCCTGATATGGCATTCCCTCGAATAAATAACATAAGCTTCTGACTCCTTCCTCCATCCTTTCTCCTCCTCCTGTCTTCATCAGGAGTTGAAGCCGGCGCGGGTACTGGATGAACAGTATACCCCCCTCTAGCCGGCAACCTCGCCCACGCAGGAGCCTCTGTTGATTTAACTATCTTCTC…	Oncorhynchus mykiss, sp.	Product substitution
MOBIL5857-17	BOLD-3K2YQEA91	Ambrose University	Sept 20 2017	2017	Sho Sushi Bar and Kitchen	Sushi	Hamachi - Yellow Tail	3.2	CACCCTCTATCTGGTATTCGGTGCCTGAGCCGGCATGGTCGGTACAGCTTTAAGTTTACTCATCCGAGCAGAACTTAGTCAACCCGGTGCTCTTCTGGGAGACGATCAAATTTATAACGTAATCGTTACAGCGCACGCGTTTGTAATAATTTTCTTTATAGTAATGCCAATTATGATTGGAGGGTTTGGGAACTGACTCATCCCCTTAATGATCGGGGCTCCCGATATAGCATTCCCCCGAATAAACAACATGAGCTTCTGACTCCTTCCCCCTTCATTCCTCCTACTTCTGGCCTCTTCAGGTGTTGAAGCCGGAGCTGGGACGGGTTGGACAGTCTACCCGCCCCTAGCCGGCAACCTTGCTCACGCGGGAGCATCCGTAGACTTAACAATTTTCTC…	Seriola quinqueradiata, Elagatis bipinnulata	Semantic mislabeling
MOBIL5765-17	BOLD-3K49ZNEO8	Ambrose University	Sept 22 2017	2017	Kabuku	Sushi	Hamachi - Yellow Tail	3.95	CACCCTCTATCTGGTATTCGGTGCCTGAGCCGGCATGGTCGGTACAGCTTTAAGTTTACTCATCCGAGCAGAACTTAGTCAACCCGGTGCTCTTCTGGGAGACGATCAAATTTATAACGTAATCGTTACAGCGCACGCGTTTGTAATAATTTTCTTTATAGTAATGCCAATTATGATTGGAGGGTTTGGGAACTGACTCATCCCCTTAATGATCGGGGCTCCCGATATAGCATTCCCCCGAATAAACAACATGAGCTTCTGACTCCTTCCCCCTTCATTCCTCCTACTTCTGGCCTCTTCAGGTGTTGAAGCCGGAGCTGGGACGGGTTGGACAGTCTACCCGCCCCTAGCCGGCAACCTTGCTCACGCGGGAGCATCCGTAGACTTAACAATTTTCTC…	Seriola quinqueradiata, Elagatis bipinnulata	Semantic mislabeling
MOBIL5780-17	BOLD-3K2ZRQ5U2	Ambrose University	Sept 23 2017	2017	Sushi Ichiban	Sushi	Hamachi - Yellow Tail	3.15	CACCCTCTATCTGGTATTCGGTGCCTGAGCCGGCATGGTCGGTACAGCTTTAAGTTTACTCATCCGAGCAGAACTTAGTCAACCCGGTGCTCTTCTGGGAGACGATCAAATTTATAACGTAATCGTTACAGCGCACGCGTTTGTAATAATTTTCTTTATAGTAATGCCAATTATGATTGGAGGGTTTGGGAACTGACTCATCCCCTTAATGATCGGGGCTCCCGATATAGCATTCCCCCGAATAAACAACATGAGCTTCTGACTCCTTCCCCCTTCATTCCTCCTACTTCTGGCCTCTTCAGGTGTTGAAGCCGGAGCTGGGACGGGTTGGACAGTCTACCCGCCCCTAGCCGGCAACCTTGCTCACGCGGGAGCATCCGTAGACTTAACAATTTTCTC…	Seriola quinqueradiata, Elagatis bipinnulata	Semantic mislabeling
MOBIL5743-17	BOLD-3K1MG2LR5	Ambrose University	Sept 25 2017	2017	Masa Sushi	Sushi	Hamachi - Yellow Tail	3.09	CACCCTCTATCTGGTATTCGGTGCCTGAGCCGGCATGGTCGGTACAGCTTTAAGTTTACTCATCCGAGCAGAACTTAGTCAACCCGGTGCTCTTCTGGGAGACGATCAAATTTATAACGTAATCGTTACAGCGCACGCGTTTGTAATAATTTTCTTTATAGTAATGCCAATTATGATTGGAGGGTTTGGGAACTGACTCATCCCCTTAATGATCGGGGCTCCCGATATAGCATTCCCCCGAATAAACAACATGAGCTTCTGACTCCTTCCCCCTTCATTCCTCCTACTTCTGGCCTCTTCAGGTGTTGAAGCCGGAGCTGGGACGGGTTGGACAGTCTACCCGCCCCTAGCCGGCAACCTTGCTCACGCGGGAGCATCCGTAGACTTAACAATTTTCTC…	Seriola quinqueradiata, Elagatis bipinnulata	Semantic mislabeling
MOBIL5835-17	BOLD-3K49721Y3	Ambrose University	Sept 28 2017	2017	Sushi Hanami	Sushi	Hamachi - Yellow Tail	3.45	TCTATCTGGTATTCGGTGCCTGAGCCGGCATGGTCGGTACAGCTTTAAGTTTACTCATCCGAGCAGAACTTAGTCAACCCGGTGCTCTTCTGGGAGACGATCAAATTTATAACGTAATCGTTACAGCGCACGCGTTTGTAATAATTTTCTTTATAGTAATGCCAATCATGATTGGAGGGTTTGGGAACTGACTCATCCCCTTAATGATCGGGGCTCCCGATATAGCATTCCCCCGAATAAACAACATGAGCTTCTGACTCCTTCCCCCTTCATTCCTCCTACTTCTGGCCTCTTCAGGTGTTGAAGCCGGAGCTGGGACGGGTTGGACAGTCTACCCGCCCCTAGCCGGCAACCTTGCTCACGCGGGAGCATCCGTAGACTTAACAATTTTCTCCCTTC…	Seriola quinqueradiata, Elagatis bipinnulata	Semantic mislabeling
MOBIL8919-18	BOLD-3MQAP7ZY5	Ambrose University	Sept 28 2018	2018	Save-on Foods	Grocery	O/W Ahi Tuna	$2.99/100 g	CCTTTATCTAGTATTCGGTGCATGAGCTGGAATAGTTGGCACGGCCTTAAGCTTGCTCATCCGAGCTGAACTAAGCCAACCAGGTGCCCTTCTTGGGGACGACCAGATCTACAATGTAATCGTTACGGCCCATGCCTTCGTAATGATTTTCTTTATAGTAATACCAATTATGATTGGAGGATTTGGAAACTGACTTATTCCTCTAATGATCGGAGCCCCCGACATGGCATTCCCACGAATGAACAACATGAGCTTCTGACTCCTTCCCCCCTCTTTCCTTCTGCTCCTAGCTTCTTCAGGAGTTGAGGCTGGAGCCGGAACCGGTTGAACAGTCTACCCTCCCCTTGCCGGCAACCTGGCCCACGCAGGGGCATCAGTTGACCTAACTATTTTCTCACT…	Thunnus albacares	Semantic mislabeling
MOBIL8911-18	BOLD-3MNUQ4W11	Ambrose University	Oct 3 2018	2018	Real Canadian Superstore	Grocery	Wild Caught Alaska Pollock	6	CTTTTATCTCGTATTTGGTGCCTGAGCCGGCATAGTCGGAACAGCCCTAAGCCTGCTCATTCGAGCAGAGCTAAGTCAACCTGGTGCACTTCTTGGTGATGATCAAATTTATAATGTGATCGTTACAGCGCACGCTTTCGTAATAATTTTCTTTATAGTAATACCACTAATAATTGGAGGCTTTGGAAACTGACTCATTCCTCTAATGATCGGTGCCCCAGATATAGCTTTCCCTCGAATAAATAACATAAGCTTCTGACTTCTTCCCCCATCTTTCCTGCTCCTTTTAGCATCCTCTGGTGTAGAAGCTGGGGCTGGAACAGGCTGAACTGTCTATCCACCTTTAGCCGGAAACCTCGCTCATGCTGGGGCATCTGTTGATCTCACTATTTTCTCTCT…	Gadus chalcogrammus	Not mislabeled
MOBIL8897-18	BOLD-3MNU1XL71	Ambrose University	Sept 18 2018	2018	Sunterra Market West Market Square	Grocery	Arctic Char fillets	$4.09/100g	CCTTTATTTAGTATTTGGTGCCTGAGCCGGAATAGTCGGCACCGCCCTTAGCCTCTTGATCCGGGCAGAGTTAAGCCAACCCGGAGCTCTTCTAGGGGATGACCAGATCTATAACGTAATCGTAACAGCCCATGCCTTCGTTATGATTTTCTTTATAGTCATACCAATTATGATCGGGGGCTTTGGAAACTGATTAATCCCTCTAATAATTGGGGCCCCAGACATAGCATTCCCTCGAATAAATAACATAAGCTTCTGACTCCTCCCACCGTCCTTTCTCCTTCTCCTGGCTTCGTCAGGGGTTGAAGCTGGCGCCGGTACGGGATGGACAGTCTACCCCCCTCTAGCCGGGAACCTCGCCCACGCAGGGGCCTCCGTTGATTTAACTATCTTCTCCCT…	Salvelinus alpinus, Salvelinus boganidae, Salvelinus umbla, Salvelinus evasus, 9 other Salvelinus sp., Salvelinus sp	Not mislabeled
MOBIL8902-18	BOLD-3MQAKHNB6	Ambrose University	Oct 2 2018	2018	Safeway Westhills Towne Centre	Grocery	Fresh Skin-On Atlantic Salmon Fillets	$39.90/kg	CCCAGCTATCTCTCAGTATCAAACCCCACTTTTTGTNTGAGCTGTATTAGTNACTGCCGTCCTTTTGTTACTCTCCCTCCCTGTTCTAGCAGCAGGCATTACCATACTACTTACAGACCGAAATCTAAATACCACTTTCTTTGACCCGGCAGGCGGAGGAGA	Salmo salar	Not mislabeled
MOBIL8896-18	BOLD-3MQPNBK62	Ambrose University	Oct 3 2018	2018	Costco	Grocery	Atlantic Salmon Fillet Farmed	$23.99/kg	CCCAGCTATCTCTCAGTATCAAACCCCACTTTTTGTTTGAGCTGTATTAGTCACTGCCGTCCTTTTGTTACTCTCCCTCCCTGTTCTAGCAGCAGGCATTACCATACTACTTACAGACCGAAATCTAAATACCACTTTCTTTGACCCGGCAGGCGGAGGAG	Salmo salar	Not mislabeled
MOBIL8873-18	BOLD-3MLWTID59	Ambrose University	Oct 3 2018	2018	Real Canadian Superstore	Grocery	Candied Smoked Atlantic Salmon Strips	9.98	TATTTAGTATTTGGTGCNTGAGCCGGAATAGTCGGCACCGCCCTAAGTCTCTTGATTCGAGCAGAACTCAGCCAGCCTGGCGCCCTTCTGGGAGATGACCAAATTTATAACGTAATTGTTACAGCCCATGCCTTCGTCATAATTTTCTTTATAGTCATACCGATTATGATCGGCGGCTTTGGAAACTGATTAATTCCTCTTATAATCGGGGCCCCCGACATAGCATTCCCCCGAATGAATAACATAAGTTTTTGACTTCTCCCTCCCTCCTTTCTTCTCCTCCTGGCCTCATCTGGAGTTGAAGCCGGCGCTGGCACCGGATGAACAGTCTACCCCCCTCTAGCAGGTAATCTTGCCCACGCAGGAGCTTCCGTTGACTTAACTATTTTTTCCCTCCAT…	Salmo salar	Not mislabeled
MOBIL8688-18	BOLD-3MQGJX973	Ambrose University	Oct 4 2018	2018	Sobey's Strathcona	Grocery	Fresh Skin-On Atlantic Salmon Fillets	$39.90/kg	CCCAGCTATCTCTCAGTATCAAACCCCACTTTTTGTTTGAGCTGTATTAGTCACTGCCGTCCTTTTGTTACTCTCCCTCCCTGTTCTAGCAGCAGGCATTACCATACTACTTACAGACCGAAATCTAAATACCACTTTCTTTGACC	Salmo salar	Not mislabeled
MOBIL8875-18	BOLD-3MN48AE26	Ambrose University	Sept 18 2018	2018	Sunterra Market West Market Square	Grocery	Salmon, Farmed Atlantic Fillet	$3.49/100 g	CCCAGCTATCTCTCAGTATCAAACCCCACTTTTTGTTTGAGCTGTATTAGTCACTGCCGTCCTTTTGTTACTCTCCCTCCCTGTTCTAGCAGCAGGCATTACCATACTACTTACAGACCGAAATCTAAATACCACTTTCTTTGACCCGGCAGGCGGAGGAGACCCA	Salmo salar	Not mislabeled
MOBIL8880-18	BOLD-3MQS7BEY7	Ambrose University	Sept 27 2018	2018	Kinjo Sushi and Grill	Sushi	Salmon Sashimi (menu), Atlantic Salmon (verbally)	$1.93/pc	CCCAGCTATCTCTCAGTATCAAACCCCACTTTTTGTTTGAGCTGTATTAGTCACTGCCGTCCTTTTGTTACTCTCCCTCCCTGTTCTAGCAGCAGGCATTACCATACTACTTACAGACCGAAATCTAAATACCACTTTCTTTGACCCGGCAGGCGGAGGAGACCCA	Salmo salar	Not mislabeled
MOBIL8883-18	BOLD-3MR4Z6FO7	Ambrose University	Oct 2 2018	2018	Safeway Westhills Towne Centre	Grocery	Basa Fillets Boneless Skinless	$17.90/kg	CCTCTACCTAGTATTTGGTGCCTGAGCAGGAATAGTTGGTACGGCCCTCAGCCTCCTAATTCGGGCAGAGCTAGCCCAACCCGGCGCCCTTCTAGGCGACGACCAAATTTATAATGTTATTGTCACTGCCCATGCCTTCGTAATAATTTTCTTTATAGTAATACCAATTATAATTGGAGGCTTTGGAAACTGACTNGTCCCCTTAATAATTGGAGCGCCTGATATGGCATTCCCTCGAATAAATAATATGAGTTTTTGATTACTTCCGCCTTCCTTCCTACTATTGCTTGCCTCCTCTGGAGTAGAAGCAGGGGCAGGAACAGGATGAACTGTATATCCACCCCTTGCTGGAAACCTCGCACATGCCGGGGCTTCTGTAGATTTAACTATTTTCTCCCT…	Pangasianodon hypophthalmus, Pangasius krempfi, P. djambal, P. sp 2, P. bocourti	Not mislabeled
MOBIL8901-18	BOLD-3MNO7ULY0	Ambrose University	Sept 28 2018	2018	Walmart Supercentre	Grocery	Basa Fillets	$15.27/kg	CCTCTACCTAGTATTTGGTGCCTGAGCAGGAATAGTTGGTACGGCCCTCAGCCTCCTAATTCGGGCAGAGCTAGCCCAACCCGGCGCCCTTCTAGGCGACGACCAAATTTATAATGTTATTGTCACTGCCCATGCCTTCGTAATAATTTTCTTTATAGTAATACCAATTATAATTGGAGGCTTTGGAAACTGACTTGTCCCCTTAATAATTGGAGCGCCTGATATGGCATTCCCTCGAATAAATAATATGAGTTTTTGATTACTTCCGCCTTCCTTCCTACTATTGCTTGCCTCCTCTGGAGTAGAAGCAGGGGCAGGAACAGGATGAACTGTATATCCACCCCTTGCTGGAAACCTCGCACATGCCGGGGCTTCTGTAGATTTAACTATTTTCTCCCT…	Pangasianodon hypophthalmus, Pangasius krempfi, P. djambal, P. sp 2, P. bocourti	Not mislabeled
MOBIL8861-18	BOLD-3MNQBZ1F3	Ambrose University	Sept 29 2018	2018	Safeway	Grocery	Basa Fillets	$1.79/100 g	GGTAGATTTAACTATTTTCTCCCTTCATCTTGCAGGGGTATCATCCATTCTAGGAGCCATTAATTTTATTACAACCATTATTAACATAAAACCACCAGCAATTTCACAATATCAAACACCTTTATTTGTATGGGC	Pangasianodon hypophthalmus	Not mislabeled
MOBIL8912-18	BOLD-3MQFN1WA5	Ambrose University	Sept 27 2018	2018	Kinjo Sushi and Grill	Sushi	Toro Sashimi (menu), Bigeye Tuna (verbally)	$2.30/pc	CCTTAAGCTTGCTCATCCGAGCTGAACTAAGCCAACCAGGTGCCCTTCTTGGGGACGACCAGATCTACAANGTAATCGTTACGGCCCATGCCTTCGTAATGATTTTCTTTATAGTAATACCAATTATGATTGGAGGATTTGGAAACTGACTTATTCCTCTAATGATCGGAGCCCCCGACATGGCATTCCCACGAATGAACAACATGAGCTTCTGACTCCTTCCTCCCTCTTTCCTTCTGCTCCTAGCTTCTTCAGGAGTTGAGGCTGGGGCCGGAACCGGTTGAACAGTCTACCCTCCCCTTGCCGGCAACCTAGCCCACGCAGGGGCATCAGTTGACCTAACTATTTTCTCACTTCACTTAGCAGGGGTTTCCTCAATTCTTGGGGCAATTAACTTCA…	Thunnus alalunga, T. obesus, T. orientalis, T. maccoyii, T. thynnus	Not mislabeled
MOBIL8858-18	BOLD-3MQJVY0A9	Ambrose University	Oct 3 2018	2018	Roku	Sushi	Hon-Maguro - Blue Fin Tuna/Red	12	CCTCTATCTAGTATTCGGTGCATGAGCTGGAATAGTTGGCACGGCCTTAAGCTTGCTCATCCGAGCTGAACTAAGCCAACCAGGTGCCCTTCTTGGGGACGACCAGATCTACAATGTAATCGTTACGGCCCATGCCTTCGTAATGATTTTCTTTATAGTAATACCAATTATGATTGGAGGATTTGGAAACTGACTTATTCCTCTAATGATCGGAGCCCCCGACATGGCATTCCCACGAATGAACAACATGAGCTTCTGACTCCTCCCTCCCTCTTTCCTTCTGCTCCTAGCTTCTTCAGGAGTTGAGGCTGGGGCCGGAACCGGTTGAACAGTCTACCCTCCCCTTGCCGGCAACCTAGCCCACGCAGGGGCATCAGTTGACCTAACTATTTTCTCACT…	Thunnus orientalis, T. thynnus, T. alalunga, T. maccoyii, T. obesus	Not mislabeled
MOBIL8900-18	BOLD-3MQI10LN1	Ambrose University	Oct 2 2018	2018	Superstore	Grocery	Canadian Lake Whitefish	8.61	CCTTTATTTAGTATTTGGTGCCTGAGCCGGAATAGTCGGCACAGCCCTAAGCCTTTTAATCCGAGCGGAACTAAGCCAACCCGGGGCTCTTCTGGGGGATGATCAGATTTATAATGTGATCGTCACGGCCCACGCCTTCGTTATGATTTTCTTTATAGTTATGCCAATTATGATTGGAGGCTTTGGAAACTGATTAATCCCACTTATAATCGGGGCCCCCGACATGGCATTTCCCCGAATGAATAATATGAGCTTTTGGCTCCTTCCCCCCTCCTTTCTCCTTCTCCTGGCCTCGTCCGGAGTTGAAGCCGGTGCCGGCACAGGATGAACAGTCTACCCCCCTCTGGCAGGCAACCTCGCCCACGCAGGAGCCTCCGTCGATTTAACTATTTTCTCCCT…	Coregonus clupeaformis	Semantic mislabeling
MOBIL8906-18	BOLD-3MNB2PQS3	Ambrose University	Sept 18 2018	2018	Sunterra Market West Market Square	Grocery	Fresh Cod Fillets	$3.69/100 g	CCCAGCTATTTCTCAATATCAAACCCCGCTTTTTGTTTGAGCTGTGTTAGTTACTGCTGTCCTTTTATTACTTTCCCTCCCCGTTCTAGCAGCAGGCATTACTATGTTACTCACGGACCGAAATCTAAACACCACTTTCTTTGACCCGGCAGGCGGAGGGGA	Salvelinus alpinus, S. boganidae, S. curilus, S. malma, S. umbla, S. evasus, 9 other S. sp.	Product substitution
MOBIL8862-18	BOLD-3MQSNC2L0	Ambrose University	Sept 28 2018	2018	Aramark at Ambrose University	Restaurant	Fish 'N Chips (cod)	7.45	CCTTTATCTCGTATTTGGTGCCTGAGCCGGCATAGTCGGAACAGCCCTAAGCCTACTCATTCGAGCAGAGCTAAGTCAACCTGGTGCACTCCTAGGTGATGATCAAATTTATAATGTGATCGTTACAGCGCACGCTTTCGTAATAATTTTCTTTATAGTAATACCACTAATAATTGGAGGCTTTGGGAACTGACTCATTCCTCTAATGATCGGTGCCCCCGATATAGCTTTCCCTCGAATAAATAACATAAGCTTCTGACTTCTCCCTCCATCTTTCCTGCTCCTTTTAGCATCCTCTGGTGTAGAAGCTGGAGCTGGAACAGGCTGAACTGTCTACCCACCTTTAGCCGGAAACCTCGCTCATGCTGGGGCATCTGTTGATCTCACTATTTTTTCTCT…	Gadus macrocephalus, Gadus ogac, Boreogadus saida	Not mislabeled
MOBIL8899-18	BOLD-3MR957LI8	Ambrose University	Sept 23 2018	2018	Masu Sushi	Sushi	Unagi (Broiled Fresh Water Eel)	2.69	CCTATATCTCGTATTTGGTGCCTGAGCCGGAATAGTCGGTACTGCACTGAGCCTTCTAATCCGTGCCGAATTAAGTCAACCAGGCGCCCTTCTTGGAGATGACCAAATTTACAATGTCATCGTCACAGCGCATGCCTTTGTAATGATTTTCTTTATAGTAATGCCAGTAATAATCGGAGGATTTGGCAACTGACTTGTGCCATTAATAATCGGCGCTCCAGACATAGCGTTCCCCCGAATAAATAATATAAGCTTCTGACTTTTACCCCCATCATTTCTTCTACTGCTAGCCTCCTCTGGAGTAGAGGCTGGGGCTGGTACAGGCTGAACTGTATATCCACCCCTGGCTGGAAACTTAGCCCACGCCGGAGCATCTGTTGACCTGACAATTTTCTCACT…	Anguilla rostrata	Semantic mislabeling
MOBIL8889-18	BOLD-3MR9J7IO7	Ambrose University	Sept 27 2018	2018	Kinjo Sushi and Grill	Sushi	Unagi Sashimi (menu), Freshwater Eel (verbal)	$2.30/pc	CCTATATCTCGTATTTGGTGCCTGAGCCGGAATAGTCGGTACTGCACTGAGCCTTCTAATCCGTGCCGAATTAAGTCAACCAGGCGCCCTTCTTGGAGATGACCAAATTTACAATGTCATCGTCACAGCGCATGCCTTTGTAATGATTTTCTTTATAGTAATGCCAGTAATAATCGGAGGATTTGGCAACTGACTTGTGCCATTAATAATCGGCGCTCCAGACATAGCGTTCCCCCGAATAAATAATATAAGCTTCTGACTTTTACCCCCATCATTTCTTCTACTACTAGCCTCCTCTGGAGTAGAGGCTGGGGCTGGTACAGGCTGAACTGTATATCCACCCCTGGCTGGAAACTTAGCCCACGCCGGAGCATCTGTTGACCTGACAATTTTCTCACT…	Anguilla rostrata	Semantic mislabeling
MOBIL8874-18	BOLD-3MQENODI2	Ambrose University	Oct 4 2018	2018	Safeway Westbrook	Grocery	Halibut Fillets	$44.90/kg	CACAACAGTCACTATGTACCAAATCCCCTTATTTGTTTGAGCCGTTCTTATTACAGCCGTACTTCTTCTTCTATCCCTGCCCGTTTTAGCCGCAGGGATTACAATACTACTAACAGACCGCAACCTTAACACGACCTTCTTTGACCCTGCCGGAGGAGGTGACCCC	Hippoglossus stenolepis, H. hippoglossus	Not mislabeled
MOBIL8915-18	BOLD-3MLU8RX29	Ambrose University	Sept 19 2018	2018	West Springs Co-op	Grocery	Halibut Fillets Fresh/Wild	$19.90/kg	CCTCTATCTCGTATTTGGTGCCTGAGCCGGAATAGTGGGGACAGGCCTAAGTCTGCTTATTCGGGCGGAACTAAGCCAACCCGGGGCTCTCCTGGGAGACGACCAAATTTATAATGTAATCGTCACCGCACACGCCTTTGTAATAATCTTTTTTATAGTAATACCCATTATGATTGGGGGGTTCGGAAACTGGCTTATTCCACTAATAATTGGGGCCCCAGATATGGCGTTCCCTCGAATGAATAATATGAGTTTCTGACTTCTTCCCCCCTCCTTTCTCCTCCTCTTAGCCTCTTCAGGTGTTGAAGCCGGAGCAGGTACCGGATGAACCGTATACCCCCCACTAGCTGGCAATTTAGCCCACGCCGGAGCATCCGTCGACCTGACAATCTTCTCACT…	Hippoglossus stenolepis, H. hippoglossus	Not mislabeled
MOBIL8860-18	BOLD-3MQNV20Y3	Ambrose University	Sept 25 2018	2018	Safeway	Grocery	Makisushi California Roll (crab meat)	5.99	CCTTTATCTCGTATTTGGTGCCTGAGCCGGCATAGTCGGAACAGCCCTAAGCCTGCTCATTCGAGCAGAGCTAAGTCAACCTGGTGCACTTCTTGGTGATGATCAAATTTATAATGTGATCGTTACAGCGCACGCTTTCGTAATAATTTTCTTTATAGTAATACCACTAATAATTGGAGGCTTTGGAAACTGACTCATTCCTCTAATGATCGGTGCCCCAGATATAGCTTTCCCTCGAATAAATAACATAAGCTTCTGACTTCTTCCCCCATCTTTCCTGCTCCTTTTAGCATCCTCTGGTGTAGAAGCTGGGGCTGGAACAGGCTGAACTGTCTATCCACCTTTAGCCGGAAACCTCGCTCATGCTGGGGCATCTGTTGATCTCACTATTTTCTCTCT…	Gadus chalcogrammus	Not mislabeled
MOBIL8853-18	BOLD-3MRCL5240	Ambrose University	Oct 3 2018	2018	Sobeys Evanston	Grocery	Cod Fillets Pacific fresh	9.02	AGCCGGCATAGTCGGAACAGCCCTAAGCCTGCTCATTCGAGCAGAGCTAAGTCAACCTGGTGCACTTCTTGGTGATGATCAAATTTATAATGTGATCGTTACAGCGCACGCTTTCGTAATAATTTTCTTTATAGTAATACCACTAATAATTGGAGGCTTTGGGAACTGACTCATCCCTCTAATGATCGGTGCACCAGATATAGCTTTCCCTCGAATAAATAACATAAGCTTCTGACTTCTTCCTCCATCTTTCCTGCTCCTTTTAGCATCCTCTGGTGTAGAAGCTGGGGCTGGAACAGGCTGAACTGTCTATCCACCTTTAGCCGGAAACCTCGCTCATGCTGGGGCATCTGTTGATCTCACTATTTTTTCTCTTCATCTAGCAGGGATTTCATCAAT…	Gadus morhua	Product substitution
MOBIL8686-18	BOLD-3MR9QD4S3	Ambrose University	Oct 4 2018	2018	Sobey's Strathcona	Grocery	Cod Fillets Pacific fresh	$39.90/kg	CCTTTATCTCGTATTTGGTGCCTGAGCCGGCATAGTCGGAACAGCCCTAAGCCTGCTCATTCGAGCAGAGCTAAGTCAACCTGGTGCACTTCTTGGTGATGATCAAATTTATAATGTGATCGTTACAGCGCACGCTTTCGTAATAATTTTCTTTATAGTAATACCACTAATAATTGGAGGCTTTGGGAACTGACTCATTCCTCTAATGATCGGTGCACCAGATATAGCTTTCCCTCGAATAAATAACATAAGCTTCTGACTTCTTCCTCCATCTTTCCTGCTCCTTTTAGCATCCTCTGGTGTAGAAGCTGGGGCTGGAACAGGCTGAACTGTCTATCCACCTTTAGCCGGAAACCTCGCTCATGCTGGGGCATCTGTTGATCTCACTATTTTTTCTCT…	Gadus morhua	Product substitution
MOBIL8917-18	BOLD-3MQL5YXT6	Ambrose University	Sept 28 2018	2018	Save-on Foods	Grocery	Pacific Rock Fish Fillets	$1.69/100 g	CCCGGCCATCTCTCAATACCAGACACCCTTATTTGTGTGAGCCGTCCTAATTACCGCTGTTCTTCTCCTTCTCTCCCTACCAGTTCTCGCTGCCGGCATCACAATGCTCCTTACCGACCGAAATCTTAATACCACCTTCTTTGACCCGGCAGGAGGGGGAG	Sebastes pinniger, S. miniatus, S. rufus, S. carnatus, S. ensifer	Semantic mislabeling
MOBIL8687-18	BOLD-3MO4Y1GS2	Ambrose University	Oct 4 2018	2018	Sobey's Strathcona	Grocery	Fresh Wild Pacific Snapper Fillets	$19.90/kg	CCTTTATCTAGTATTTGGTGCCTGAGCCGGTATAGTAGGCACAGCCCTCAGCCTACTCATTCGAGCAGAACTAAGCCAACCGGGCGCTCTCCTTGGAGACGACCAAATTTATAATGTAATCGTTACAGCACATGCCTTCGTAATGATTTTCTTTATAGTAATGCCAATTATAATTGGAGGTTTTGGAAACTGATTAATTCCCCTAATGATTGGGGCCCCAGATATAGCATTTCCTCGTATAAACAACATAAGTTTCTGACTTCTTCCCCCTTCTTTCCTACTACTACTTGCCTCTTCTGGAGTAGAAGCGGGTGCCGGAACCGGGTGAACAGTGTACCCGCCCCTGGCTGGTAACTTAGCCCACGCAGGAGCATCAGTCGACCTGACAATCTTTTCACT…	Sebastes melanostictus, S. sp., S. aleutianus, S. steindachneri	Product substitution
MOBIL8857-18	BOLD-3MQDGP855	Ambrose University	Oct 2 2018	2018	Safeway Westhills Towne Centre	Grocery	Fresh Wild Pacific Snapper Fillets	$19.90/kg	CCTTTATCTAGTATTTGGTGCCTGAGCCGGTATAGTAGGCACAGCCCTCAGCCTACTCATTCGAGCAGAACTAAGCCAACCGGGCGCTCTCCTTGGAGACGACCAAATTTATAATGTAATCGTTACAGCACATGCCTTCGTAATGATTTTCTTTATAGTAATGCCAATTATAATTGGAGGTTTTGGAAACTGATTAATTCCCCTAATGATTGGAGCCCCAGATATAGCATTTCCTCGTATAAATAACATAAGTTTCTGACTTCTACCCCCTTCTTTCCTACTACTACTTGCCTCTTCTGGAGTAGAAGCGGGTGCCGGAACCGGGTGAACAGTGTACCCGCCCCTGGCTGGTAATTTAGCCCACGCAGGAGCATCAGTCGACTTGACAATCTTTTCACT…	Sebastes brevispinis, S. borealis, S. zacentrus, S. sp., S. wilsoni, S. emphaeus, S. alutus, S. rufus	Not mislabeled
MOBIL8907-18	BOLD-3MR5WYSH3	Ambrose University	Oct 4 2018	2018	Safeway	Grocery	Fresh Wild Pacific Snapper Fillets	$19.90/kg	CCCGGCCATCTCTCAATACCAGACACCCCTATTTGTATGAGCGGTCCTAATTACCGCTGTTCTTCTCCTTCTCTCTCTACCAGTTCTCGCTGCCGGCATCACAATGCTCCTTACCGACCGAAATCTTAATACCACCTTCTTTGACCCGGCTGGAGGAGGGGA	Sebastes zacentrus, S. emphaeus, S. wilsoni, S. sp., S. brevispinis	Not mislabeled
MOBIL8864-18	BOLD-3MNGVS5A7	Ambrose University	Sept 18 2018	2018	Sunterra Market West Market Square	Grocery	Pacific Snapper Fillet	$2.79/100 g	CCTTTATCTAGTATTTGGTGCCTGAGCCGGTATAGTAGGCACAGCCCTCAGCCTACTCATTCGAGCAGAACTAAGCCAACCGGGCGCTCTCCTTGGAGACGACCAAATTTATAATGTAATCGTTACAGCACATGCCTTCGTAATGATTTTCTTTATAGTAATGCCAATTATAATTGGAGGTTTTGGAAACTGATTAATTCCCCTAATGATTGGAGCCCCAGATATAGCATTTCCTCGTATAAATAATATAAGTTTCTGACTTCTACCCCCTTCTTTCCTTCTACTACTTGCCTCTTCTGGGGTAGAAGCTGGTGCCGGAACCGGATGAACAGTGTACCCGCCCCTGTCCGGTAATTTAGCCCACGCAGGAGCATCAGTCGATCTGACAATTTTTTCACT…	Sebastes serranoides, S. flavidus, S. sp., S. melanops, S. variabilis	Not mislabeled
MOBIL8893-18	BOLD-3MQSWIJ79	Ambrose University	Oct 2 2018	2018	Safeway Westhills Towne Centre	Grocery	Fresh Pickerel Fillets	$49.90/kg	CCTTTATCTAGTATTTGGTGCTTGAGCCGGAATAGTGGGCACAGCTCTAAGCCTACTCATCCGAGCGGAACTAAGCCAACCCGGCGCTCTCCTTGGAGACGACCAAATTTATAACGTAATTGTTACGGCACATGCCTTTGTAATAATCTTCTTTATAGTAATACCCATTATGATTGGAGGTTTTGGGAATTGACTCATCCCACTCATAATTGGTGCCCCCGATATAGCATTCCCTCGAATAAATAACATAAGCTTTTGACTTCTGCCCCCCTCTTTCCTTCTCCTTCTTGCCTCCTCAGGGGTTGAGGCAGGAGCTGGTACCGGGTGGACTGTTTATCCCCCATTAGCTGGAAACCTGGCACACGCCGGGGCATCTGTCGACTTAACCATTTTTTCTCT…	Sander vitreus	Not mislabeled
MOBIL8918-18	BOLD-3MQJU8Y74	Ambrose University	Oct 3 2018	2018	Sushi Gunza	Sushi	Tai - Red Snapper	2.25	CCTCTATCTAGTATTTGGTGCTTGAGCCGGAATAGTAGGAACTGCACTAAGCCTCCTAATTCGGGCAGAACTAAGCCAGCCCGGCTCTCTTCTCGGAGACGACCAAATCTATAATGTAATTGTTACAGCACATGCTTTCGTAATAATTTTCTTTATAGTAATACCAATTATGATTGGAGGCTTTGGAAACTGACTAGTACCCCTCATGATTGGTGCACCAGACATGGCCTTCCCTCGAATAAATAACATGAGCTTTTGACTTCTCCCCCCCTCATTTCTTCTTCTTCTCGCCTCATCTGGAGTCGAAGCAGGTGCCGGCACAGGATGGACTGTTTATCCCCCGCTCGCAGGCAATCTTGCCCACGCTGGACCTTCTGTTGACTTAACCATCTTCTCCCT…	Oreochromis sp., O. niloticus, O. aureus, O. aureus x niloticus, O. mossambicus, 14 O. sp.	Product substitution
MOBIL8913-18	BOLD-3MQDL0WI5	Ambrose University	Sept 24 2018	2018	Sobeys	Grocery	Spicy Roll Salmon	8.49	CCTCTATTTAGTATTTGGTGCCTGAGCCGGGATAGTAGGCACCGCCCTTAGTCTACTGATTCGGGCAGAACTAAGCCAGCCGGGCGCTCTTCTAGGGGATGACCAGATCTATAACGTGATCGTCACAGCCCATGCCTTCGTTATGATTTTCTTTATAGTTATGCCGATTATGATCGGAGGCTTTGGAAACTGATTAATTCCCCTAATGATCGGGGCCCCTGATATGGCATTCCCTCGAATAAATAACATAAGCTTCTGACTCCTTCCACCATCCTTTCTCCTCCTCCTATCTTCCTCTGGAGTTGAAGCCGGAGCTGGCACCGGGTGAACAGTCTACCCCCCTCTGGCCGGCAACCTAGCCCACGCAGGAGCCTCAGTTGATCTGACGATCTTCTCCCT…	Oncorhynchus tshawytscha	Product substitution
MOBIL8854-18	BOLD-3MO5A1409	Ambrose University	Sept 30 2018	2018	Haru Sushi	Sushi	Salmon Sashimi	$5.99/3 pc	CCTTGCCGGCAACCTAGCCCACGCAGGGGCATCAGTTGACCTAACTATTTTCTCACTTCACTTAGCAGGGGTTTCCTCAATTCTTGGGGCAATTAACTTCATCACAACAATTATCAATATGAAACCTGCAGCTATCTCTCAATATCAAACACCACTGTTTGTATGAGCTGTACTAATTAC	Thunnus alalunga, T. obesus	Product substitution
MOBIL8856-18	BOLD-3MNLGR824	Ambrose University	Sept 30 2018	2018	Edo Japan	Sushi	Salmon	$2.10/pc	CCTCTATTTAGTATTTGGTGCCTGAGCCGGGATAGTAGGCACCGCCCTGAGTCTACTGATTCGGGCGGAACTAAGCCAGCCGGGCGCTCTTCTGGGGGATGACCAAATCTATAACGTGATCGTCACAGCCCATGCCTTCGTTATGATTTTCTTTATAGTCATGCCAATTATAATCGGGGGCTTTGGAAACTGATTAATTCCCCTAATAATCGGAGCCCCTGATATGGCATTTCCTCGAATAAATAACATAAGCTTCTGACTCCTTCCTCCATCCTTTCTCCTCCTCCTGTCTTCATCAGGAGTTGAAGCCGGCGCGGGTACTGGATGAACAGTATACCCCCCTCTAGCCGGCAACCTCGCCCACGCAGGAGCCTCTGTTGATTTAACTATCTTCTCCCT…	Oncorhynchus mykiss, sp.	Product substitution
MOBIL8869-18	BOLD-3MQK4ACN6	Ambrose University	Oct 2 2018	2018	Misato Sushi and Grill	Sushi	Salmon Sashimi	$16.95 per 8 pc	CCCAGCTATCTCTCAGTATCAAACCCCACTTTTTGTTTGAGCTGTATTAGTCACTGCCGTCCTTTTGTTACTCTCCCTCCCTGTTCTAGCAGCAGGCATTACCATACTACTTACAGACCGAAATCTAAATACCACTTTCTTTGACCCGGCAGGCGGAGGAGACCCAA	Salmo salar	Not mislabeled
MOBIL8890-18	BOLD-3MN8KRIS4	Ambrose University	Sept 23 2018	2018	Masu Sushi	Sushi	Sake (Raw Salmon)	2.29	CCCAGCTATCTCTCAGTATCAAACCCCACTTTTTGTTTGAGCTGTATTAGTCACTGCCGTCCTTTTGTTACTCTCCCTCCCTGTTCTAGCAGCAGGCATTACCATACTACTTACAGACCGAAATCTAAATACCACTTTCTTTGACCCGGCAGGCGGAGGAGA	Salmo salar	Not mislabeled
MOBIL8885-18	BOLD-3MQCN7H50	Ambrose University	Sept 25 2018	2018	Safeway	Grocery	Makisushi - Salmon Avocado	6.99	CCCAGCTATCTCTCAGTATCAAACCCCACTTTTTGTTTGAGCTGTATTAGTCACTGCCGTCCTTTTATTACTCTCCCTCCCTGTTCTAGCAGCAGGCATTACCATACTACTTACAGACCGAAATCTAAATACCACTTTCTTTGACCC	Salmo salar	Not mislabeled
MOBIL8903-18	BOLD-3MQTAYNH3	Ambrose University	Sept 27 2018	2018	Fusion Sushi	Sushi	Salmon	2	CCCAGCTATCTCTCAGTATCAAACCCCACTTTTTGTTTGAGCTGTATTAGTCACTGCCGTCCTTTTGTTACTCTCCCTCCCTGTTCTAGCAGCAGGCATTACCATACTACTTACAGACCGAAATCTAAATACCACTTTCTTTGACCCGGCAGGCGGAGGAGACCCAATCT	Salmo salar	Not mislabeled
MOBIL8894-18	BOLD-3MO0DNJR7	Ambrose University	Sept 30 2018	2018	Tawa Sushi	Sushi	Salmon - Seared	4.15	CCCAGCTATCTCTCAGTATCAAACCCCACTTTTTGTTTGAGCTGTATTAGTCACTGCCGTCCTTTTGTTACTCTCCCTCCCTGTTCTAGCAGCAGGCATTACCATACTACTTACAGACCGAAATCTAAATACCACTTT	Salmo salar	Not mislabeled
MOBIL8870-18	BOLD-3MQF9RCX3	Ambrose University	Sept 27 2018	2018	Fusion Sushi	Sushi	Snapper	2	CCTCTATCTAGTATTTGGTGCTTGAGCCGGAATAGTAGGAACTGCATTAAGCCTCCTAATTCGGGCAGAACTAAGCCAGCCCGGCTCTCTCCTCGGAGACGACCAGATTTATAATGTAATTGTTACAGCACATGCTTTCGTAATAATTTTCTTTATAGTAATGCCAATTATAATTGGAGGTTTTGGAAACTGACTAGTGCCACTAATGATTGGTGCACCAGACATGGCCTTCCCTCGAATAAATAACATGAGTTTTTGACTCCTCCCCCCCTCATTTCTCCTTCTCCTCGCCTCATCCGGGGTCGAAGCAGGGGCCGGTACAGGATGGACTGTTTATCCCCCACTCGCAGGCAATCTCGCCCATGCTGGGCCTTCCGTTGACTTAACCATCTTCTCCCT…	Oreochromis mossambicus, O. sp., O. niloticus, 42 Oreochromis sp, O. aureux x O. niloticus, O. mossambicus x O. niloticus	Product substitution
MOBIL8859-18	BOLD-3MR41T0P2	Ambrose University	Oct 3 2018	2018	Sushi Gunza	Sushi	Shake (Sockeye) - Wild Sockeye Salmon	3.5	CCTCTATTTAGTATTTGGTGCCTGAGCCGGGATAGTCGGCACCGCCCTAAGCCTACTGATTCGGGCAGAACTAAGCCAGCCAGGCGCTCTTCTAGGAGATGACCAGATCTATAACGTAATCGTCACAGCCCATGCCTTCGTTATGATTTTCTTTATAGTCATGCCAATTATAATCGGAGGATTTGGAAACTGATTAATCCCTCTAATAATCGGAGCCCCCGATATGGCATTCCCACGAATAAATAACATAAGCTTCTGACTCCTCCCCCCCTCGTTTCTCCTCCTCCTATCTTCATCTGGAGTTGAAGCCGGCGCTGGTACCGGATGAACAGTTTATCCCCCTCTGGCCGGAAACCTTGCCCACGCGGGAGCCTCTGTTGACTTAACCATCTTCTCCCT…	Oncorhynchus nerka	Not mislabeled
MOBIL8855-18	BOLD-3MQKZ0646	Ambrose University	Oct 3 2018	2018	Roku	Sushi	Sockeye Salmon - Wild	3	CCTCTATTTAGTATTTGGTGCCTGAGCCGGGATAGTCGGCACCGCCCTAAGCCTACTGATTCGGGCAGAACTAAGCCAGCCAGGCGCTCTTCTAGGAGATGACCAGATCTATAACGTAATCGTCACAGCCCATGCCTTCGTTATGATTTTCTTTATAGTCATACCAATTATAATCGGAGGATTTGGAAACTGATTAATCCCCCTAATAATCGGAGCCCCCGATATGGCATTCCCACGAATAAATAACATAAGCTTCTGACTCCTCCCCCCCTCGTTTCTCCTCCTCCTATCTTCATCTGGAGTTGAAGCCGGCGCTGGTACCGGATGAACAGTTTATCCCCCTCTGGCCGGAAACCTTGCCCACGCGGGAGCCTCTGTTGACTTAACCATCTTCTCCCT…	Oncorhynchus nerka	Not mislabeled
MOBIL8882-18	BOLD-3MQ9OIFC3	Ambrose University	Sept 30 2018	2018	Sobey's Co-op	Grocery	Wild Sockeye Salmon Fillet	33.43	CCTCTATTTAGTATTTGGTGCCTGAGCCGGGATAGTCGGCACCGCCCTAAGCCTACTGATTCGGGCAGAACTAAGCCAGCCAGGCGCTCTTCTAGGAGATGACCAGATCTATAACGTAATCGTCACAGCCCATGCCTTCGTTATGATTTTCTTTATAGTCATACCAATTATAATCGGAGGATTTGGAAACTGATTAATCCCTCTAATAATCGGAGCCCCCGATATGGCATTCCCACGAATAAATAACATAAGCTTCTGACTCCTCCCCCCCTCGTTTCTCCTCCTCCTATCTTCATCTGGAGTTGAAGCCGGCGCTGGTACCGGATGAACAGTTTATCCCCCTCTGGCCGGAAACCTTGCCCACGCGGGAGCCTCTGTTGACTTAACCATCTTCTCCCT…	Oncorhynchus nerka	Not mislabeled
MOBIL8872-18	BOLD-3MNL2TD44	Ambrose University	Oct 3 2018	2018	Co-op (Airdrie)	Grocery	Sole Fillets	2.06	CCTCTATCTCGTATTTGGTGCCTGAGCCGGAATAGTGGGCACAGGCCTAAGTCTGCTTATTCGAGCAGAACTAAGCCAACCTGGGGCTCTCCTAGGAGACGACCAAATTTATAACGTAATCGTCACCGCACACGCCTTTGTAATAATCTTTTTTATAGTAATACCCATTATGATTGGGGGCTTTGGAAACTGACTTATCCCCTTAATAATTGGGGCCCCTGACATAGCGTTCCCCCGAATAAATAACATGAGTTTCTGACTCCTTCCCCCATCCTTTCTGCTACTCCTAGCCTCTTCAGGTGTTGAAGCAGGGGCAGGTACTGGGTGAACCGTGTACCCCCCACTAGCTGGCAATCTAGCCCATGCTGGAGCATCTGTAGACCTAACAATCTTCTCACT…	Microstomus pacificus	Not mislabeled
MOBIL8863-18	BOLD-3MO2GF4I9	Ambrose University	Oct 4 2018	2018	Superstore	Grocery	Wild Caught Sole in the North Pacific Ocean	10.47	CCTCTATCTCGTATTTGGTGCCTGAGCCGGAATAGTGGGGACAGGTCTAAGTCTGCTCATTCGGGCAGAACTCAGCCAACCTGGGGCTCTCCTGGGAGACGATCAAATTTATAACGTGATCGTTACCGCACACGCCTTTGTAATAATCTTCTTTATAGTAATACCAATTATGATCGGAGGGTTCGGAAACTGACTTATCCCACTAATGATCGGGGCCCCTGATATGGCGTTCCCTCGAATGAACAACATGAGTTTCTGACTTCTGCCTCCATCCTTTCTTCTCCTCCTAGCCTCTTCAGGCGTAGAAGCCGGGGCTGGAACTGGGTGAACTGTGTATCCTCCGTTAGCTGGAAATCTAGCACACGCTGGAGCATCCGTAGACCTAACAATCTTTTCTCT…	Limanda aspera	Not mislabeled
MOBIL8916-18	BOLD-3MQL2BXT0	Ambrose University	Sept 29 2018	2018	Safeway	Grocery	Fresh Sole Fillets	$1.99/100 g	CCTCTATCTCGTATTTGGTGCCTGAGCCGGAATAGTGGGCACAGGCCTAAGTCTGCTTATTCGAGCAGAACTAAGCCAACCTGGGGCTCTCCTAGGAGACGACCAAATTTATAACGTAATCGTCACCGCACACGCCTTTGTAATAATCTTTTTTATAGTAATACCCATTATGATTGGGGGCTTTGGAAACTGACTTATCCCCTTAATAATTGGGGCCCCTGACATAGCGTTCCCCCGAATAAATAACATGAGTTTCTGACTCCTTCCCCCATCCTTTCTGCTACTCCTAGCCTCTTCAGGTGTTGAAGCAGGGGCAGGTACTGGGTGAACCGTGTACCCCCCACTAGCTGGCAATCTAGCCCATGCTGGAGCATCTGTAGACCTAACAATCTTCTCACT…	Microstomus pacificus	Not mislabeled
MOBIL8867-18	BOLD-3MRD59AZ3	Ambrose University	Sept 29 2018	2018	Safeway	Grocery	Fillets Fresh Steelhead Trout	$3.99/100 g	CCTCTATTTAGTATTTGGTGCCTGAGCCGGGATAGTAGGCACCGCCCTGAGTCTACTGATTCGGGCGGAACTAAGCCAGCCGGGCGCTCTTCTGGGGGATGACCAAATCTATAACGTGATCGTCACAGCCCATGCCTTCGTTATGATTTTCTTTATAGTCATGCCAATTATAATCGGGGGCTTTGGAAACTGATTAATTCCCCTAATAATCGGAGCCCCTGATATGGCATTCCCTCGAATAAATAACATAAGCTTCTGACTCCTTCCTCCATCCTTTCTCCTCCTCCTGTCTTCATCAGGAGTTGAAGCCGGCGCGGGTACTGGATGAACAGTATACCCCCCTCTAGCCGGCAACCTCGCCCACGCAGGAGCCTCTGTTGATTTAACTATCTTCTCCCT…	Oncorhynchus mykiss	Not mislabeled
MOBIL8891-18	BOLD-3MQVHEIZ1	Ambrose University	Oct 3 2018	2018	Sobeys Evanston	Grocery	Northern King Gutted and Scaled Tilapia	7.99	TCTATCTAGTATTTGGTGCTTGAGCCGGAATAGTAGGAACTGCACTAAGCCTCCTAATTCGGGCAGAACTAAGCCAGCCCGGCTCTCTTCTCGGAGACGACCAAATCTATAATGTAATTGTTACAGCACATGCTTTCGTAATAATTTTCTTTATAGTAATACCAATTATGATTGGAGGCTTTGGAAACTGACTAGTACCCCTCATGATTGGTGCACCAGACATGGCCTTCCCTCGAATAAATAACATGAGCTTTTGACTTCTCCCCCCCTCATTTCTTCTTCTTCTCGCCTCATCTGGAGTCGAAGCAGGTGCCGGCACAGGATGGACTGTTTATCCCCCGCTCGCAGGCAATCTTGCCCACGCTGGACCTTCTGTTGACTTAACCATCTTCTCCCTCC…	Oreochromis sp., O. niloticus, O. aureus, O. aureus x niloticus, O. mossambicus, 14 O. sp.	Not mislabeled
MOBIL8650-18	BOLD-3MQAK0EY6	Ambrose University	Sept 23 2018	2018	Cultures in Chinook Mall	Restaurant	Chili Lime Tilapia + Mango Salsa	8.39	CCTCTATCTAGTATTTGGTGCTTGAGCCGGAATAGTAGGAACCGCGCTAAGCCTCCTAATTCGGGCAGAACTAAGCCAGCCCGGCTCTCTCCTCGGAGACGACCAGATTTATAATGTAATTGTTACAGCACATGCTTTTGTAATAATTTTCTTTATAGTAATGCCAATTATGATTGGAGGCTTTGGAAACTGACTAGTACCACTCATGATTGGTGCTCCAGATATGGCCTTCCCTCGAATGAACAACATGAGTTTCTGACTCCTCCCTCCCTCATTCCTCCTCCTCCTCGCCTCATCTGGAGTCGAAGCAGGTGCCGGCACAGGGTGAACTGTTTACCCCCCGCTCGCAGGCAATCTTGCCCATGCTGGGCCTTCTGTCGACTTAACCATCTTCTCCCT…	Oreochromis niloticus, O. aureus, Tilapia zilii, O. massambicus, O. niloticus x O. aureus, O. sp.	Not mislabeled
MOBIL8895-18	BOLD-3MQD8SJT7	Ambrose University	Sept 27 2018	2018	Fusion Sushi	Sushi	Tuna	2	CCTGTATCTCGTATTCGGTGCATGAGCTGGTATAGTGGGGACAGCCCTAAGCCTCCTCATCCGAGCTGAACTAAGCCAACCAGGCGCCCTTCTCGGAGACGACCAAATTTATAATGTAATCGTTACGGCACACGCCTTCGTAATAATCTTCTTTATAGTAATACCAGTCATGATCGGAGGATTTGGGAACTGACTTATCCCTCTAATAATTGGAGCCCCCGACATAGCATTCCCTCGAATGAATAACATAAGCTTTTGACTTCTGCCTCCATCCTTCCTCCTGCTATTAGCCTCTTCAGGAGTTGAAGCCGGAGCTGGAACCGGGTGGACAGTATACCCTCCCCTGGCCGGTAATTTAGCCCATGCTGGAGCATCCGTTGACCTAACCATTTTTTCCCT…	Lepidocybium flavobrunneum	Product substitution
MOBIL8868-18	BOLD-3MO1XWC98	Ambrose University	Sept 23 2018	2018	Masu Sushi	Sushi	Maguro (Tuna)	2.29	CCTCTATCTAGTATTCGGTGCATGAGCTGGAATAGTTGGCACGGCCTTAAGCTTGCTCATCCGAGCTGAACTAAGCCAACCAGGTGCCCTTCTTGGGGACGACCAGATCTACAATGTAATCGTTACGGCCCATGCCTTCGTAATGATTTTCTTTATAGTAATACCAATTATGATTGGAGGATTTGGAAACTGACTTATTCCTCTAATGATCGGAGCCCCCGACATGGCATTCCCACGAATGAACAACATGAGCTTCTGACTCCTTCCTCCCTCTTTCCTTCTGCTCCTAGCTTCTTCAGGAGTTGAGGCTGGGGCCGGAACCGGTTGAACAGTCTACCCTCCCCTTGCCGGCAACCTAGCCCACGCAGGGGCATCAGTTGACCTAACTATTTTCTCACT…	Thunnus alalunga, T. obesus, T. orientalis, T. thynnus	Not mislabeled
MOBIL8909-18	BOLD-3MNKB6TI3	Ambrose University	Sept 24 2018	2018	Sobeys	Grocery	Spicy Roll Tuna	8.49	CCTCTATCTAGTATTCGGTGCATGAGCTGGAATAGTTGGCACGGCCTTAAGCTTGCTCATCCGAGCTGAACTAAGCCAACCAGGTGCCCTTCTTGGGGACGACCAGATCTACAATGTAATCGTTACGGCCCATGCCTTCGTAATGATTTTCTTTATAGTAATACCAATTATGATTGGAGGATTTGGAAACTGACTTATTCCTCTAATGATCGGAGCCCCCGACATGGCATTCCCACGAATGAACAACATGAGCTTCTGACTCCTTCCTCCCTCTTTCCTTCTGCTCCTAGCTTCTTCAGGAGTTGAGGCTGGGGCCGGAACCGGTTGAACAGTCTACCCTCCCCTTGCCGGCAACCTAGCCCACGCAGGGGCATCAGTTGACCTAACTATTTTCTCACT…	Thunnus alalunga, T. obesus, T. orientalis, T. thynnus	Not mislabeled
MOBIL8888-18	BOLD-3MN4V2IJ2	Ambrose University	Sept 30 2018	2018	Edo Japan	Sushi	Tuna	$2.10/pc	CCTCTATCTAGTATTCGGTGCATGAGCTGGAATAGTTGGCACGGCCTTAAGCTTGCTCATCCGAGCTGAACTAAGCCAACCAGGTGCCCTTCTTGGGGACGACCAGATCTACAATGTAATCGTTACGGCCCATGCCTTCGTAATGATTTTCTTTATAGTAATACCAATTATGATTGGAGGATTTGGAAACTGACTTATTCCTCTAATGATCGGAGCCCCCGACATGGCATTCCCACGAATGAACAACATGAGCTTCTGACTCCTTCCTCCCTCTTTCCTTCTGCTCCTAGCTTCTTCAGGAGTTGAGGCTGGGGCCGGAACCGGTTGAACAGTCTACCCTCCCCTTGCCGGCAACCTAGCCCACGCAGGGGCATCAGTTGACCTAACTATTTTCTCACT…	Thunnus alalunga, T. obesus, T. orientalis, T. thynnus	Not mislabeled
MOBIL8884-18	BOLD-3MO1V7G05	Ambrose University	Sept 30 2018	2018	Haru Sushi	Sushi	Tuna Sashimi	$5.99/3 pc	CCTCTATCTAGTATTCGGTGCATGAGCTGGAATAGTTGGCACGGCCTTAAGCTTGCTCATCCGAGCTGAACTAAGCCAACCAGGTGCCCTTCTTGGGGACGACCAGATCTACAATGTAATCGTTACGGCCCATGCCTTCGTAATGATTTTCTTTATAGTAATACCAATTATGATTGGAGGATTTGGAAACTGACTTATTCCTCTAATGATCGGAGCCCCCGACATGGCATTCCCACGAATGAACAACATGAGCTTCTGACTCCTTCCTCCCTCTTTCCTTCTGCTCCTAGCTTCTTCAGGAGTTGAGGCTGGGGCCGGAACCGGTTGAACAGTCTACCCTCCCCTTGCCGGCAACCTAGCCCACGCAGGGGCATCAGTTGACCTAACTATTTTCTCACT…	Thunnus alalunga, T. obesus, T. orientalis, T. thynnus	Not mislabeled
MOBIL8892-18	BOLD-3MNY87J13	Ambrose University	Oct 3 2018	2018	Co-op (Airdrie)	Grocery	Walleye Fillets Fresh Wild	6.18	CCTTTATCTAGTATTTGGTGCTTGAGCCGGAATAGTGGGCACAGCTCTAAGCCTACTCATCCGAGCGGAACTAAGCCAACCCGGCGCTCTCCTTGGAGACGACCAAATTTATAACGTAATTGTTACGGCACATGCCTTTGTAATAATCTTCTTTATAGTAATACCCATTATGATTGGAGGTTTTGGGAATTGACTCATCCCACTCATAATTGGTGCCCCCGATATAGCATTCCCTCGAATAAATAACATAAGCTTTTGACTTCTGCCCCCCTCTTTCCTTCTCCTTCTTGCCTCCTCAGGGGTTGAGGCAGGAGCTGGTACCGGGTGGACTGTTTATCCCCCATTAGCTGGAAACCTGGCACACGCCGGGGCATCTGTCGACTTAACCATTTTTTCTCT…	Sander vitreus	Not mislabeled
MOBIL8905-18	BOLD-3MNXTEQO3	Ambrose University	Sept 19 2018	2018	West Springs Co-op	Grocery	Walleye Fillets Fresh/Wild	$29.90/kg	TTGGAGACGACCAAATTTATAACGTAATTGTTACGGCACATGCCTTTGTAATAATCTTCTTTATAGTAATACCCATTATGATTGGAGGTTTTGGGAATTGACTCATCCCACTCATAATTGGTGCCCCCGATATAGCATTCCCTCGAATAAATAACATAAGCTTTTGACTTCTGCCCCCCTCTTTCCTTCTCCTTCTTGCCTCCTCAGGGGTTGAGGCAGGAGCTGGTACCGGGTGGACTGTTTATCCCCCATTAGCTGGAAACCTGGCACACGCCGGGGCATCTGTCGACTTAACCATTTTTTCTCTACATTTAGCAGGAATTTCCTCAATTCTAGGCGCAATTAATTTTATCACAACTATTATTAACATAAAACCCCCTGCTATTTNTCAATACCAGA…	Sander vitreus	Not mislabeled
MOBIL8876-18	BOLD-3MR67QEB8	Ambrose University	Oct 3 2018	2018	Sushi Gunza	Sushi	Maguro (White) - White Tuna	2.5	CCTCTATCTAGTATTCGGTGCATGAGCTGGAATAGTTGGCACGGCCTTAAGCTTGCTCATCCGAGCTGAACTAAGCCAACCAGGTGCCCTTCTTGGGGACGACCAGATCTACAATGTAATCGTTACGGCCCATGCCTTCGTAATGATTTTCTTTATAGTAATACCAATTATGATTGGAGGATTTGGAAACTGACTTATTCCTCTAATGATCGGAGCCCCCGACATGGCATTCCCACGAATGAACAACATGAGCTTCTGACTCCTTCCTCCCTCTTTCCTTCTGCTCCTAGCTTCTTCAGGAGTTGAGGCTGGGGCCGGAACCGGTTGAACAGTCTACCCTCCCCTTGCCGGCAACCTAGCCCACGCAGGGGCATCAGTTGACCTAACTATTTTCTCACT…	Thunnus alalunga, T. obesus, T. orientalis, T. thynnus	Semantic mislabeling
MOBIL8871-18	BOLD-3MR4OACX7	Ambrose University	Sept 30 2018	2018	Tawa Sushi	Sushi	Tuna - White	3.9	CCTCTATCTAGTATTCGGTGCATGAGCTGGAATAGTTGGCACGGCCTTAAGCTTGCTCATCCGAGCTGAACTAAGCCAACCAGGTGCCCTTCTTGGGGACGACCAGATCTACAATGTAATCGTTACGGCCCATGCCTTCGTAATGATTTTCTTTATAGTAATACCAATTATGATTGGAGGATTTGGAAACTGACTTATTCCTCTAATGATCGGAGCCCCCGACATGGCATTCCCACGAATGAACAACATGAGCTTCTGACTCCTTCCTCCCTCTTTCCTTCTGCTCCTAGCTTCTTCAGGAGTTGAGGCTGGGGCCGGAACCGGTTGAACAGTCTACCCTCCCCTTGCCGGCAACCTAGCCCACGCAGGGGCATCAGTTGACCTAACTATTTTCTCACT…	Thunnus alalunga, T. obesus, T. orientalis, T. thynnus	Semantic mislabeling
MOBIL8904-18	BOLD-3MNUASQH4	Ambrose University	Oct 3 2018	2018	Co-op (Airdrie)	Grocery	Yellow Fin Tuna Steak	13.6	CCTTTATCTAGTATTCGGTGCATGAGCTGGAATAGTTGGCACGGCCTTAAGCTTGCTCATCCGAGCTGAACTAAGCCAACCAGGTGCCCTTCTTGGGGACGACCAGATCTACAATGTAATCGTTACGGCCCATGCCTTCGTAATGATTTTCTTTATAGTAATACCAATTATGATTGGAGGATTTGGAAACTGACTTATTCCTCTAATGATCGGAGCCCCCGACATGGCATTCCCACGAATGAACAACATGAGCTTCTGACTCCTTCCCCCCTCTTTCCTTCTGCTCCTAGCTTCTTCAGGAGTTGAGGCTGGAGCCGGAACCGGTTGAACAGTCTACCCTCCCCTTGCCGGCAACCTGGCCCACGCAGGGGCATCAGTTGACCTAACTATTTTCTCACT…	Thunnus albacares	Not mislabeled
MOBIL8877-18	BOLD-3MQA72EG2	Ambrose University	Oct 3 2018	2018	Sushi Gunza	Sushi	Hamachi - Yellow Tail	3.75	CCTCTATCTGGTATTCGGTGCCTGAGCCGGCATGGTCGGTACAGCTTTAAGTTTACTCATCCGAGCAGAACTTAGTCAACCCGGTGCTCTTCTGGGAGACGATCAAATTTATAACGTAATCGTTACGGCGCACGCGTTTGTAATAATTTTCTTTATAGTAATGCCAATTATGATTGGAGGGTTTGGGAACTGACTCATCCCCTTAATGATCGGGGCTCCCGATATAGCATTCCCCCGAATAAACAACATGAGCTTCTGACTCCTTCCCCCTTCATTCCTCCTACTTCTGGCCTCTTCAGGTGTTGAAGCCGGAGCTGGGACGGGTTGGACAGTCTACCCGCCCCTAGCCGGCAACCTTGCTCACGCGGGAGCATCCGTAGACTTAACAATTTTCTCCCT…	Seriola quinqueradiata, Elagatis bipinnulata	Semantic mislabeling
MOBIL8898-18	BOLD-3MNSWFL77	Ambrose University	Sept 23 2018	2018	Masu Sushi	Sushi	Hamachi (Yellow Tail)	3.09	CCTCTATCTGGTATTCGGTGCCTGAGCCGGCATGGTCGGTACAGCTTTAAGTTTACTCATCCGAGCAGAACTTAGTCAACCCGGTGCTCTTCTGGGAGACGATCAAATTTATAACGTAATCGTTACAGCGCACGCGTTTGTAATAATTTTCTTTATAGTAATGCCAATTATGATTGGAGGGTTTGGGAACTGACTCATCCCCTTAATGATCGGGGCTCCCGATATAGCATTCCCCCGAATAAACAACNNGAGCTTCTGACTCCTTCCCCCTTCATTCCTCCTACTTCTGGCCTCTTCAGGTGTTGAAGCCGGAGCTGGGACGGGTTGGACAGTCTACCCGCCCCTAGCCGGCAACCTTGCTCACGCGGGAGCATCCGTAGACTTAACAATTTTCTCCCT…	Seriola quinqueradiata, Elagatis bipinnulata	Semantic mislabeling
MOBIL8865-18	BOLD-3MQBTH7C6	Ambrose University	Sept 27 2018	2018	Kinjo Sushi and Grill	Sushi	Hamachi Sashimi (menu), Yellowtail (verbal)	$2.30/pc	CCTCTATCTGGTATTCGGTGCCTGAGCCGGCATGGTCGGTACAGCTTTAAGTTTACTCATCCGAGCAGAACTTAGTCAACCCGGTGCTCTTCTGGGAGACGATCAAATTTATAACGTAATCGTTACAGCGCACGCGTTTGTAATAATTTTCTTTATAGTAATGCCAATTATGATTGGAGGGTTTGGGAACTGACTCATCCCCTTAATGATCGGGGCTCCCGATATAGCATTCCCCCGAATAAACAACATGAGCTTCTGACTCCTTCCCCCTTCATTCCTCCTACTTCTGGCCTCTTCAGGTGTTGAAGCCGGAGCTGGGACGGGTTGGACAGTCTACCCGCCCCTAGCCGGCAACCTTGCTCACGCGGGAGCATCCGTAGACTTAACAATTTTCTCCCT…	Seriola quinqueradiata, Elagatis bipinnulata	Semantic mislabeling
		Ambrose University	Oct 1 2019	2019	Costco	Grocery	Kirkland Signature Farmed Atlantic Salmon	32.99	TGAGCCGGAATAGTCGGCACCGCCCTAAGTCTCTTGATTCGAGCAGAACTCAGCCAGCCTGGCGCCCTTCTGGGAGATGACCAAATTTATAACGTAATTGTTACAGCCCATGCCTTCGTCATAATTTTCTTTATAGTCATACCGATTATGATCGGCGGCTTTGGAAACTGATTAATTCCTCTTATAATCGGGGCCCCCGACATAGCATTCCCCCGAATGAATAACATAAGTTTTTGACTTCTCCCTCCCTCCTTTCTTCTCCTCCTGGCCTCATCTGGAGTTGAAGCCGGCGCTGGCACCGGATGAACAGTCTACCCCCCTCTAGCAGGTAATCTTGCCCACGCAGGAGCTTCCGTTGACTTAACTATTTTTTCCCTCCATTTGGCTGGTATTTCTTCA…	Salmo salar	Not mislabeled
		Ambrose University	Oct 2 2019	2019	M&M Food Market	Grocery	Teriyaki Salmon - Atlantic Salmon Fillets	12.99	TGAGCCGGAATAGTCGGCACCGCCCTAAGTCTCTTGATTCGAGCAGAACTCAGCCAGCCTGGCGCCCTTCTGGGAGATGACCAAATTTATAACGTAATTGTTACAGCCCATGCCTTCGTCATAATTTTCTTTATAGTCATACCGATTATGATCGGCGGCTTTGGAAACTGATTAATTCCTCTTATAATCGGGGCCCCCGACATAGCATTCCCCCGAATGAATAACATAAGTTTTTGACTTCTCCCTCCCTCCTTTCTTCTCCTCCTGGCCTCATCTGGAGTTGAAGCCGGCGCTGGCACCGGATGAACAGTCTACCCCCCTCTAGCAGGTAATCTTGCCCACGCAGGAGCTTCCGTTGACTTAACTATTTTTTCCCTCCATTTGGCTGGTATTTCTTCA…	Salmo salar	Not mislabeled
		Ambrose University	Sept 19 2019	2019	Co-op	Grocery	Atlantic Salmon Fillets Fresh/Farmed	$38.99/kg	CCCAGCTATCTCTCAGTATCAAACCCCACTTTTTGTTTGAGCTGTATTAGTCACTGCCGTCCTTTTGTTACTCTCCCTCCCTGTTCTAGCAGCAGGCATTACCATACTACTTACAGACCGAAATCTAAATACCACTTTCTTTGACCCGGCAGGCGGAGGAGACCCAATC	Salmo salar	Not mislabeled
		Ambrose University	Sept 21 2019	2019	Real Canadian Superstore	Grocery	Fresh Farmed Atlantic Salmon Fillet Skinless	$30.82/kg	CCCAGCTATCTCTCAGTATCAAACCCCACTTTTTGTTTGAGCTGTATTAGTCACTGCCGTCCTTTTGTTACTCTCCCTCCCTGTTCTAGCAGCAGGCATTACCATACTACTTACAGACCGAAATCTAAATACCACTTTCTTTGACCCGGCAGGCGGAGGAGACCCAATC	Salmo salar	Not mislabeled
		Ambrose University	Sept 21 2019	2019	North Sea Fish Market	Market	Atlantic Salmon Fillet Fresh Farmed	$18.99/lb	CCCAGCTATCTCTCAGTATCAAACCCCACTTTTTGTTTGAGCTGTATTAGTCACTGCCGTCCTTTTGTTACTCTCCCTCCCTGTTCTAGCAGCAGGCATTACCATACTACTTACAGACCGAAATCTAAATACCACTTTCTTTGACCCGGCAGGCGGAGGAGACCCAATC	Salmo salar	Not mislabeled
		Ambrose University	Sept 18 2019	2019	Safeway	Grocery	Basa Fillets Boneless Skinless Previously Frozen	$17.90/kg	ACCAGCAATTTCACAATATCAAACACCTTTATTTGTATGGGCTGTCTTAATTACAGCTGTTCTTCTATTATTATCTCTACCAGTACTGGCTGCCGGCATTACTATACTCCTAACAGATCGAAACCTAAATACTACATTCTTTGATCCTGCAGGCGGAGGAGATCCTATTTTATATCAAC	Pangasianodon hypophthalmus, Pangasius krempfi	Not mislabeled
		Ambrose University	Sept 21 2019	2019	Real Canadian Superstore	Grocery	Fresh Boneless Cod Fillets	$29.94/kg	TGAGCCGGCATAGTCGGAACAGCCCTAAGCCTACTCATTCGAGCAGAGCTAAGTCAACCTGGTGCACTCCTAGGTGATGATCAAATTTATAATGTGATCGTTACAGCGCACGCTTTCGTAATAATTTTCTTTATAGTAATACCACTAATAATTGGAGGCTTTGGGAACTGACTCATTCCTCTAATGATCGGTGCCCCCGATATAGCTTTCCCTCGAATAAATAACATAAGCTTCTGACTTCTCCCTCCATCTTTCCTGCTCCTTTTAGCATCCTCTGGTGTAGAAGCTGGAGCTGGAACAGGCTGAACTGTCTACCCGCCTTTAGCCGGAAACCTCGCTCATGCTGGGGCATCTGTTGATCTCACTATTTTTTCTCTCCATCTAGCAGGGATTTCATCA…	Gadus macrocephalus, Gadus ogac, Boreogadus saida	Not mislabeled
		Ambrose University	Sept 21 2019	2019	Kinjo Sushi and Grill	Sushi	Mackerel (Saba)	4.4/2 pc	TGATCTGGAATAGTTGGCACGGCCTTAAGCTTGCTTATCCGAGCCGAACTAAGCCAACCAGGGTCCCTTCTCGGCGACGACCAAGTTTATAACGTAATTGTTACGGCCCATGCCTTCATTATAATCTTCTTTTTAGTAATACCAGTCATGATTGGAGGGTTCGGAAACTGACTGATCCCCCTAATGATCGGAGCCCCCGATATAGCATTCCCCCGAATGAATAACATAAGCTTCTGACTTCTTCCCCCTTCTCTCCTACTACTCCTGTCTTCTTCGGCAGTTGAAGCTGGAGCCGGAACTGGCTGAACAGTCTACCCCCCACTAGCTGGTAACCTAGCGCATGCCGGGGCATCAGTTGACCTAACCATCTTCTCCCTTCACCTAGCAGGTGTCTCCTCA…	Scomber scombrus	Not mislabeled
		Ambrose University	Oct 11 2019	2019	Boyd's Lobster Shop	Market	Mahi-mahi	19.23	CCTTTATTTGATTTTCGGTGTCTTAGCAGGGATAACAGGAACAGGTTTAAGTCTTCTCATTCGAGCTGAGTTAAGCCAGCCTGGGTCACTTCTAGGAGATGACCAAACCTATAATGTCATCGTTACAGCACATGCCTTCGTAATAATTTTCTTTATAGTTATGCCAATTATGATCGGAGGCTTCGGGAACTGATTAATCCCACTGATGCTTGGCGCTCCTGATATAGCATTCCCTCGAATAAATAACATAAGCTTTTGACTTCTTCCACCATCATTTCTTCTCCTTCTAGCCTCTTCAGGGGTAGAAGCAGGAGCAGGAACTGGTTGAACGGTCTACCCACCTCTGGCGGGTAACTTAGCCCATGCTGGGGCCTCTGTAGATTTAACAATTTTCTCCCT…	Coryphaena hippurus, C. equiselis	Not mislabeled
		Ambrose University	Oct 1 2019	2019	T&T Supermarket	Grocery	Frozen Ocean Perch Fish	$7.69/kg	TGAGCCGGTATAGTAGGCACAGCCCTCAGCCTACTCATTCGAGCAGAACTAAGCCAACCGGGCGCTCTCCTTGGAGACGACCAAATTTATAATGTAATCGTTACAGCACATGCCTTCGTAATGATTTTCTTTATAGTAATGCCAATTATAATTGGAGGTTTTGGAAACTGATTAATTCCCCTAATGATTGGAGCCCCAGATATAGCATTTCCTCGTATAAATAACATAAGTTTCTGACTTCTACCCCCTTCTTTCCTACTACTACTTGCCTCTTCTGGAGTAGAAGCGGGTGCCGGAACCGGGTGAACAGTGTACCCGCCCCTGTCTGGTAATTTAGCCCACGCAGGAGCATCAGTCGACCTGACAATCTTTTCACTTCACCTAGCAGGTATTTCCTCA…	Sebastes alutus, Sebastes sp. OC146, S. crameri, S. reedi, S. miniatus, S. polyspinis, S. ciliatus, S. variabilis	Not mislabeled
		Ambrose University	Oct 1 2019	2019	Costco	Grocery	Kirkland Signature - Pacific Cod Fillet Wild	$21.99/kg	TGAGCCGGCATAGTCGGAACAGCCCTAAGCCTACTCATTCGAGCAGAGCTAAGTCAACCTGGTGCACTCCTAGGTGATGATCAAATTTATAATGTGATCGTTACAGCGCACGCTTTCGTAATAATTTTCTTTATAGTAATACCACTAATAATTGGAGGCTTTGGGAACTGACTCATTCCTCTAATGATCGGTGCCCCCGATATAGCTTTCCCTCGAATAAATAACATAAGCTTCTGACTTCTCCCTCCATCTTTCCTGCTCCTTTTAGCATCCTCTGGTGTAGAAGCTGGAGCTGGAACAGGCTGAACTGTCTACCCACCTTTAGCCGGAAACCTCGCTCATGCTGGGGCATCTGTTGATCTCACTATTTTTTCTCTCCATCTAGCAGGGATTTCATCA…	Gadus macrocephalus, Gadus ogac, Boreogadus saida	Not mislabeled
		Ambrose University	Sept 21 2019	2019	Real Canadian Superstore	Grocery	Fresh Pacific Rock Fish Fillets	$23.77/kg	TGAGCCGGTATAGTAGGCACAGCCCTCAGCCTACTCATTCGAGCAGAACTAAGCCAACCGGGCGCTCTCCTTGGGGACGACCAAATTTATAATGTAATCGTTACAGCACATGCCTTCGTAATGATTTTCTTTATAGTAATGCCAATTATAATTGGAGGTTTTGGAAACTGATTAATTCCCCTAATGATTGGAGCCCCAGATATAGCATTTCCTCGTATAAATAATATAAGTTTCTGACTTCTACCCCCCTCTTTCCTTCTACTACTTGCCTCTTCTGGGGTAGAAGCTGGTGCCGGAACCGGATGAACAGTGTACCCGCCCCTGTCCGGTAATTTAGCCCACGCAGGAGCATCAGTCGATCTGACAATTTTTTCACTTCACCTAGCAGGTATTTCCTCA…	Sebastes serranoides, S. flavidus, S. melanops, S. variabilis	Semantic mislabeling
		Ambrose University	Sept 23 2019	2019	Edo Japan	Sushi	Salmon	$6.95/8 pc	TGAGCCGGGATAGTAGGCACCGCCCTGAGTCTACTGATTCGGGCGGAACTAAGCCAGCCGGGCGCTCTTCTGGGGGATGACCAAATCTATAACGTGATCGTCACAGCCCATGCCTTCGTTATGATTTTCTTTATAGTCATGCCAATTATAATCGGGGGCTTTGGAAACTGATTAATTCCCCTAATAATCGGAGCCCCTGATATGGCATTTCCTCGAATAAATAACATAAGCTTCTGACTCCTTCCTCCATCCTTTCTCCTCCTCCTGTCTTCATCAGGAGTTGAAGCCGGCGCGGGTACTGGATGAACAGTATACCCCCCTCTAGCCGGCAACCTCGCCCACGCAGGAGCCTCTGTTGATTTAACTATCTTCTCCCTTCATTTAGCTGGAATCTCCTCA…	Oncorhynchus mykiss, sp.	Product substitution
		Ambrose University	Sept 24 2019	2019	Rand G Pinoy Dollar Store	Grocery	Salmon	$5.99/unit	TGAGCCGGGATAGTAGGCACCGCCCTAAGCCTACTAATTCGGGCAGAACTAAGCCAGCCAGGCGCTCTTCTAGGGAATGACCAGATCTATAACGTAATCGTTACAGCCCATGCCTTCGTTATGATTTTCTTTATAGTCATACCAATTATAATCGGAGGCTTTGGAAACTGATTAATCCCCCTAATGATCGGGGCACCAGATATAGCATTTCCACGAATAAACAACATAAGCTTCTGACTCCTGCCCCCATCCTTCCTCCTCCTCCTTTCTTCATCTGGAGTCGAAGCCGGCGCTGGTACCGGATGGACAGTTTATCCCCCTCTAGCCGGGAACCTTGCCCACGCAGGAGCATCCGTCGACTTAACTATCTTCTCCCTTCATTTAGCTGGAATCTCATCA…	Oncorhynchus gorbuscha	Product substitution
		Ambrose University	Oct 2 2019	2019	Kinjo Sushi and Grill	Sushi	Salmon	$1.95/roll	CCCAGCTATCTCTCAGTATCAAACCCCACTTTTTGTTTGAGCTGTATTAGTCACTGCCGTCCTTTTGTTACTCTCCCTCCCTGTTCTAGCAGCAGGCATTACCATACTACTTACAGACCGAAATCTAAATACCACTTTCTTTGACCCGGCAGGCGGAGGAGACCCAATC	Salmo salar	Not mislabeled
		Ambrose University	Sept 19 2019	2019	Fusion Sushi	Sushi	Salmon Sushi	20.95	TGAGCCGGAATAGTCGGCACCGCCCTAAGTCTCTTGATTCGAGCAGAACTCAGCCAGCCTGGCGCCCTTCTGGGAGATGACCAAATTTATAACGTAATTGTTACAGCCCATGCCTTCGTCATAATTTTCTTTATAGTCATACCGATTATGATCGGCGGCTTTGGAAACTGATTAATTCCTCTTATAATCGGGGCCCCCGACATAGCATTCCCCCGAATGAATAACATAAGTTTTTGACTTCTCCCTCCCTCCTTTCTTCTCCTCCTGGCCTCATCTGGAGTTGAAGCCGGCGCTGGCACCGGATGAACAGTCTACCCCCCT	Salmo salar	Not mislabeled
		Ambrose University	Sept 23 2019	2019	Safeway	Grocery	Sashimi - Salmon	7.99/pc	CCCAGCTATCTCTCAGTATCAAACCCCACTTTTTGTTTGAGCTGTATTAGTCACTGCCGTCCTTTTATTACTCTCCCTCCCTGTTCTAGCAGCAGGCATTACCATACTACTTACAGACCGAAATCTAAATACCACTTTCTTTGACCCGGCAGGCGGAGGGGACCCAATC	Salmo salar	Not mislabeled
		Ambrose University	Sept 24 2019	2019	Haru Sushi Bar	Sushi	Salmon Sushi	2.29	TGAGCCGGAATAGTCGGCACCGCCCTAAGTCTCTTGATTCGAGCAGAACTCAGCCAGCCTGGCGCCCTTCTGGGAGATGACCAAATTTATAACGTAATTGTTACAGCCCATGCCTTCGTCATAATTTTCTTTATAGTCATACCGATTATGATCGGCGGCTTTGGAAACTGATTAATTCCTCTTATAATCGGGGCCCCCGACATAGCATTCCCCCGAATGAATAACATAAGTTTTTGACTTCTCCCTCCCTCCTTTCTTCTCCTCCTGGCCTCATCTGGAGTTGAAGCCGGCGCTGGCACCGGATGAACAGTCTACCCCCCTCTAGCAGGTAATCTTGCCCACGCAGGAGCTTCCGTTGACTTAACTATTTTTTCCCTCCATTTGGCTGGTATTTCTTCA…	Salmo salar	Not mislabeled
		Ambrose University	Sept 25 2019	2019	Point Sushi - Bullet Train Sushi Bar	Sushi	Salmon Roll	$2.20/4 rolls	TGAGCCGGAATAGTCGGCACCGCCCTAAGTCTCTTGATTCGAGCAGAACTCAGCCAGCCTGGCGCCCTTCTGGGAGATGACCAAATTTATAACGTAATTGTTACAGCCCATGCCTTCGTCATAATTTTCTTTATAGTCATACCGATTATGATCGGCGGCTTTGGAAACTGATTAATTCCTCTTATAATCGGGGCCCCCGACATAGCATTCCCCCGAATGAATAACATAAGTTTTTGACTTCTCCCTCCCTCCTTTCTTCTCCTCCTGGCCTCATCTGGAGTTGAAGCCGGCGCTGGCACCGGATGAACAGTCTACCCCCCTCTAGCAGGTAATCTTGCCCACGCAGGAGCTTCCGTTGACTTAACTATTTTTTCCCTCCATTTGGCTGGTATTTCTTCA…	Salmo salar	Not mislabeled
		Ambrose University	Sept 18 2019	2019	Haru Sushi Bar	Sushi	Snapper	~$1.14 per roll	TGAGCCGGAATAGTAGGAACTGCACTAAGCCTCCTAATTCGGGCAGAACTAAGCCAGCCCGGCTCTCTTCTCGGAGACGACCAAATCTATAATGTAATTGTTACAGCACATGCTTTCGTAATAATTTTCTTTATAGTAATACCAATTATGATTGGAGGCTTTGGAAACTGACTAGTACCCCTCATGATTGGTGCACCAGACATGGCCTTCCCTCGAATAAATAACATGAGCTTTTGACTTCTCCCCCCCTCATTTCTTCTTCTTCTCGCCTCATCTGGAGTCGAAGCAGGTGCCGGCACAGGATGGACTGTTTATCCCCCGCTCGCAGGCAATCTTGCCCACGCTGGACCTTCTGTTGACTTAACCATCTTCTCCCTCCACTTGGCCGGAGTGTCATCT…	Oreochromis sp., O. niloticus, O. mossambicus, O. aureus, O. aureus x niloticus, 14 O. sp.	Product substitution
		Ambrose University	Sept 18 2019	2019	Co-op	Grocery	Smoked Wild Sockeye Salmon	13.99/150 g	TGAGCCGGGATAGTCGGCACCGCCCTAAGCCTACTGATTCGGGCAGAACTAAGCCAGCCAGGCGCTCTTCTAGGAGATGACCAGATCTATAACGTAATCGTCACAGCCCATGCCTTCGTTATGATTTTCTTTATAGTCATACCAATTATAATCGGAGGATTTGGAAACTGATTAATCCCTCTAATAATCGGAGCCCCCGATATGGCATTCCCACGAATAAATAACATAAGCTTCTGACTCCTCCCCCCCTCGTTTCTCCTCCTCCTATCTTCATCTGGAGTTGAAGCCGGCGCTGGTACCGGATGAACAGTTTATCCCCCTCTGGCCGGAAACCTTGCCCACGCGGGAGCCTCTGTTGACTTAACCATCTTCTCCCTTCATTTAGCTGGAATTTCCTCA…	Oncorhynchus nerka	Not mislabeled
		Ambrose University	Oct 1 2019	2019	Blair's No Frills	Grocery	HighLiner Pan-Sear Selects Tilapia Lime Chili	$2.74/fillet	TGAGCCGGAATAGTAGGAACTGCATTAAGCCTCCTAATTCGGGCAGAACTAAGCCAGCCCGGCTCTCTCCTCGGAGACGACCAGATTTATAATGTAATTGTTACAGCACATGCTTTCGTAATAATTTTCTTTATAGTAATGCCAATTATAATTGGAGGTTTTGGAAACTGACTAGTGCCACTAATGATTGGTGCACCAGACATGGCCTTCCCTCGAATAAATAACATGAGTTTTTGACTCCTCCCCCCCTCATTTCTCCTTCTCCTCGCCTCATCCGGGGTCGAAGCAGGGGCCGGTACAGGATGGACTGTTTATCCCCCACTCGCAGGCAATCTCGCCCATGCTGGGCCTTCCGTTGACTTAACCATCTTCTCCCTCCACTTGGCCGGGGTGTCATCT…	Oreochromis mossambicus, O. sp., O. niloticus, 43 Oreochromis sp, O. aureux x O. niloticus, O. mossambicus x O. niloticus	Not mislabeled
		Ambrose University	Sept 16 2019	2019	Superstore	Grocery	Catch of the Day Tilapia Fillets	9.97	TGAGCCGGAATAGTAGGAACTGCATTAAGCCTCCTAATTCGGGCAGAACTAAGCCAGCCCGGCTCTCTCCTCGGAGACGACCAGATTTATAATGTAATTGTTACAGCACATGCTTTCGTAATAATTTTCTTTATAGTAATGCCAATTATAATTGGAGGTTTTGGAAACTGACTAGTGCCACTAATGATTGGTGCACCAGACATGGCCTTCCCTCGAATAAATAACATGAGTTTTTGACTCCTCCCCCCCTCATTTCTCCTTCTCCTCGCCTCATCCGGGGTCGAAGCAGGGGCCGGTACAGGATGGACTGTTTATCCCCCACTCGCAGGCAATCTCGCCCATGCTGGGCCTTCCGTTGACTTAACCATCTTCTCCCTCCACTTGGCCGGGGTGTCATCT…	Oreochromis mossambicus, O. sp., O. niloticus, 43 Oreochromis sp, O. aureux x O. niloticus, O. mossambicus x O. niloticus	Not mislabeled
		Ambrose University	Oct 2 2019	2019	Kinjo Sushi and Grill	Sushi	Tuna	$1.95/roll	TGAGCTGGAATAGTTGGCACGGCCTTAAGCTTGCTCATCCGAGCTGAACTAAGCCAACCAGGTGCCCTTCTTGGGGACGACCAGATCTACAATGTAATCGTTACGGCCCATGCCTTCGTAATGATTTTCTTTATAGTAATACCAATTATGATTGGAGGATTTGGAAACTGACTTATTCCTCTAATGATCGGAGCCCCCGACATGGCATTCCCACGAATGAACAACATGAGCTTCTGACTCCTTCCTCCCTCTTTCCTTCTGCTCCTAGCTTCTTCAGGAGTTGAGGCTGGGGCCGGAACCGGTTGAACAGTCTACCCTCCCCTTGCCGGCAACCTAGCCCACGCAGGGGCATCAGTTGACCTAACTATTTTCTCACTTCACTTAGCAGGGGTTTCCTCA…	Thunnus alalunga, T. obesus, T. orientalis, T. thynnus, T. maccoyii	Not mislabeled
		Ambrose University	Sept 17 2019	2019	Sobey's	Grocery	Tuna Avocado Roll	$8.99 total, 0.99 per roll	TGAGCTGGAATAGTTGGCACGGCCTTAAGCTTGCTCATCCGAGCTGAACTAAGCCAACCAGGTGCCCTTCTTGGGGACGACCAGATCTACAATGTAATCGTTACGGCCCATGCCTTCGTAATGATTTTCTTTATAGTAATACCAATTATGATTGGAGGATTTGGAAACTGACTTATTCCTCTAATGATCGGAGCCCCCGACATGGCATTCCCACGAATGAACAACATGAGCTTCTGACTCCTTCCCCCCTCTTTCCTTCTGCTCCTAGCTTCTTCAGGAGTTGAGGCTGGAGCCGGAACCGGTTGAACAGTCTACCCTCCCCTTGCCGGCAACCTGGCCCACGCAGGGGCATCAGTTGACCTAACTATTTTCTCACTTCACTTAGCAGGGGTTTCCTCA…	Thunnus albacares	Not mislabeled
		Ambrose University	Sept 25 2019	2019	Point Sushi - Bullet Train Sushi Bar	Sushi	Tuna Roll	$2.20/4 pc	TGAGCTGGAATAGTTGGCACGGCCTTAAGCTTGCTCATCCGAGCTGAACTAAGCCAACCAGGTGCCCTTCTTGGGGACGACCAGATCTACAATGTAATCGTTACGGCCCATGCCTTCGTAATGATTTTCTTTATAGTAATACCAATTATGATTGGAGGATTTGGAAACTGACTTATTCCTCTAATGATCGGAGCCCCCGACATGGCATTCCCACGAATGAACAACATGAGCTTCTGACTCCTTCCTCCCTCTTTCCTTCTGCTCCTAGCTTCTTCAGGAGTTGAGGCTGGGGCCGGAACCGGTTGAACAGTCTACCCTCCCCTTGCCGGCAACCTAGCCCACGCAGGGGCATCAGTTGACCTAACTATTTTCTCACTTCACTTAGCAGGGGTTTCCTCA…	Thunnus alalunga, T. obesus, T. orientalis, T. thynnus, T. maccoyii	Not mislabeled
		Ambrose University	Sept 24 2019	2019	Haru Sushi Bar	Sushi	Unagi Avocado Roll	6.99	TGAGCCGGAATAGTCGGTACTGCACTGAGCCTTCTAATCCGTGCCGAATTAAGTCAACCAGGCGCCCTTCTTGGAGATGACCAAATTTACAATGTCATCGTCACAGCGCATGCCTTTGTAATGATTTTCTTTATAGTAATGCCAGTAATAATCGGAGGATTTGGCAACTGACTTGTGCCATTAATAATCGGCGCTCCAGACATAGCGTTCCCCCGAATAAATAATATAAGCTTCTGACTTTTACCCCCATCATTTCTTCTACTACTAGCCTCCTCTGGAGTAGAGGCTGGGGCTGGTACAGGCTGAACTGTATATCCACCCCTGGCTGGAAACTTAGCCCACGCCGGAGCATCTGTTGACCTGACAATTTTCTCACTTCACCTTGCAGGAATCTCATCA…	Anguilla rostrata	Semantic mislabeling
		Ambrose University	Sept 25 2019	2019	Point Sushi - Bullet Train Sushi Bar	Sushi	Hamachi (Yellow Tail)	$8.75/3 pc	TGAGCCGGCATGGTCGGTACAGCTTTAAGTTTACTCATCCGAGCAGAACTTAGTCAACCCGGTGCTCTTCTGGGAGACGATCAAATTTATAACGTAATCGTTACAGCGCACGCGTTTGTAATAATTTTCTTTATAGTAATGCCAATTATGATTGGAGGGTTTGGGAACTGACTCATCCCCTTAATGATCGGGGCTCCCGATATAGCATTCCCCCGAATAAACAACATGAGCTTCTGACTCCTTCCCCCTTCATTCCTCCTACTTCTGGCCTCTTCAGGTGTTGAAGCCGGAGCTGGGACGGGTTGGACAGTCTACCCGCCCCTAGCCGGCAACCTTGCTCACGCGGGAGCATCCGTAGACTTAACAATTTTCTCCCTTCATTTAGCTGGGATCTCCTCA…	Seriola quinqueradiata, Elagatis bipinnulata	Semantic mislabeling
		Ambrose University	Sept 20 2020	2020	Safeway	Grocery	Fresh Atlantic Salmon Fillets Skin On	$39.90/kg	CACCCTCTATTTAGTATTTGGTGCCTGAGCCGGAATAGTCGGCACCGCCCTAAGTCTCTTGATTCGAGCAGAACTCAGCCAGCCTGGCGCCCTTCTGGGAGATGACCAAATTTATAACGTAATTGTTACAGCCCATGCCTTCGTCATAATTTTCTTTATAGTCATACCGATTATGATCGGCGGCTTTGGAAACTGATTAATTCCTCTTATAATCGGGGCCCCCGACATAGCATTCCCCCGAATGAATAACATAAGTTTTTGACTTCTCCCTCCCTCCTTTCTTCTCCTCCTGGCCTCATCTGGAGTTGAAGCCGGCGCTGGCACCGGATGAACAGTCTACCCCCCTCTAGCAGGTAATCTTGCCCACGCAGGAGCTTCCGTTGACTTAACTATTTTTTC…	Salmo salar	Not mislabeled
		Ambrose University	Sept 21 2020	2020	Costco Wholesale	Grocery	Kirkland Signature Farmed Atlantic Salmon	$33.99/1.36 kg	TATTTAGTATTTGGTGCCTGAGCCGGAATAGTCGGCACCGCCCTAAGTCTCTTGATTCGAGCAGAACTCAGCCAGCCTGGCGCCCTTCTGGGAGATGACCAAATTTATAACGTAATTGTTACAGCCCATGCCTTCGTCATAATTTTCTTTATAGTCATACCGATTATGATCGGCGGCTTTGGAAACTGATTAATTCCTCTTATAATCGGGGCCCCCGACATAGCATTCCCCCGAATGAATAACATAAGTTTTTGACTTCTCCCTCCCTCCTTTCTTCTCCTCCTGGCCTCATCTGGAGTTGAAGCCGGCGCTGGCACCGGATGAACAGTCTACCCCCCTCTAGCAGGTAATCTTGCCCACGCAGGAGCTTCCGTTGACTTAACTATTTTTTCCCTCCAT…	Salmo salar	Not mislabeled
		Ambrose University	Sept 24 2020	2020	Real Canadian Superstore	Grocery	Fresh Farmed Atlantic Salmon Fillet Skinless	$28.62/kg	CACCCTCTATTTAGTATTTGGTGCCTGAGCCGGAATAGTCGGCACCGCCCTAAGTCTCTTGATTCGAGCAGAACTCAGCCAGCCTGGCGCCCTTCTGGGAGATGACCAAATTTATAACGTAATTGTTACAGCCCATGCCTTCGTCATAATTTTCTTTATAGTCATACCGATTATGATCGGCGGCTTTGGAAACTGATTAATTCCTCTTATAATCGGGGCCCCCGACATAGCATTCCCCCGAATGAATAACATAAGTTTTTGACTTCTCCCTCCCTCCTTTCTTCTCCTCCTGGCCTCATCTGGAGTTGAAGCCGGCGCTGGCACCGGATGAACAGTCTACCCCCCTCTAGCAGGTAATCTTGCCCACGCAGGAGCTTCCGTTGACTTAACTATTTTTTC…	Salmo salar	Not mislabeled
		Ambrose University	Sept 24 2020	2020	Skyview Grocery	Grocery	Menu Brand Popcorn Basa Fish, daar-ul-iffta certified	10.99	GCAGAGCTAGCCCAACCCGGCGCCCTTNTAGGCGACGACCAAATTTATAATGTTATTGTCACTGCCCATGCCTTCGTAATAATTTTCTTTATAGTAATACCAATTATAATTGGAGGCTTTGGAAACTGACTTGTCCCCTTAATAATTGGAGCGCCTGATATGGCATTCCCTCGAATAAATAATATGAGTTTTTGATTACTTCCGCCTTCCTTCCTANTATTGCTTGCCTCCTCTGGAGTAGAAGCAGGGGCAGGAACAGGATGAACTGTATATCCACCCCTTGCTGGAAACCTCGCACATGCCGGGGCTTCNGTAGATTTAACTATTTTCTCCCTTCATCTTGCAGGGGTATCATCCATTCTAGGAGCCATTAATTTTATTACAACCATTATTAACATA…	Pangasianodon hypophthalmus, Pangasius krempfi	Not mislabeled
		Ambrose University	Sept 20 2020	2020	Safeway	Grocery	Our Compliments Balance Wild Haddock Fillets	$7.99/400 g	CACCCTTTATCTCGTATTTGGTGCCTGAGCCGGCATAGTCGGAACAGCCTTAAGCCTGCTCATTCGAGCAGAGCTAAGTCAACCTGGTGCACTTCTAGGTGATGATCAAATTTATAATGTGATTGTCACAGCACACGCTTTCGTAATAATTTTCTTTATAGTAATACCACTAATAATTGGAGGCTTCGGAAACTGACTCATTCCTCTAATGATTGGTGCCCCAGATATGGCTTTCCCTCGAATAAACAACATAAGTTTCTGACTTCTTCCTCCATCTTTTCTGCTTCTTTTAGCATCATCTGGAGTAGAAGCTGGAGCTGGTACAGGTTGAACTGTTTATCCCCCTTTAGCTGGAAACCTCGCTCATGCTGGGGCATCTGTTGACCTCACTATTTTTTC…	Melanogrammus aeglefinus	Not mislabeled
		Ambrose University	Sept 23 2020	2020	Safeway	Grocery	Janes Ultimates - Battered Haddock - Hand Cut Fillets	$2.14 per filelt	CACCCTTTATCTCGTATTTGGTGCCTGAGCCGGCATAGTCGGAACAGCCTTAAGCCTGCTCATTCGAGCAGAGCTAAGTCAACCTGGTGCACTTCTAGGTGATGATCAAATTTATAATGTGATTGTCACAGCACACGCTTTCGTAATAATTTTCTTTATAGTAATACCACTAATAATTGGAGGCTTCGGAAACTGACTCATTCCTCTAATGATTGGTGCCCCAGATATGGCTTTCCCTCGAATAAACAACATAAGTTTCTGACTTCTTCCTCCATCTTTTCTGCTTCTTTTAGCATCATCTGGAGTAGAAGCTGGAGCTGGCACAGGTTGAACTGTTTATCCCCCTTTAGCTGGAAACCTCGCTCATGCTGGGGCATCTGTTGACCTCACTATTTTTTC…	Melanogrammus aeglefinus	Not mislabeled
		Ambrose University	Sept 20 2020	2020	Superstore	Grocery	Package: Pink Salmon Oncorhynchus gorbuscha; sticker: Salmon Pink Pacific Wild	$12.08/kg	CACCCTCTATTTAGTATTTGGTGCCTGAGCCGGGATAGTAGGCACCGCCCTAAGCCTACTAATTCGGGCAGAACTAAGCCAGCCAGGCGCTCTTCTAGGGAATGACCAGATCTATAACGTAATCGTTACAGCCCATGCCTTCGTTATGATTTTCTTTATAGTCATACCAATTATAATCGGAGGCTTTGGAAACTGATTAATCCCCCTAATGATCGGGGCACCAGATATAGCATTTCCACGAATAAACAACATAAGCTTCTGACTCCTGCCCCCATCCTTCCTCCTCCTCCTTTCTTCATCTGGAGTCGAAGCCGGCGCTGGTACCGGATGGACAGTTTATCCCCCTCTAGCCGGGAACCTTGCCCACGCAGGAGCATCCGTCGACTTAACTATCTTCTC…	Oncorhynchus gorbuscha	Not mislabeled
		Ambrose University	Sept 22 2020	2020	Lucky Supermarket	Grocery	Maynila's Choice Brand Red Snapper/Maya-Maya	$5.99/lb	CACCCTTTATCTAGTATTTGGTGCTTGAGCCGGTATAGTAGGCACGGCCCTAAGCCTGCTCATTCGAGCAGAGCTTAGTCAACCAGGAGCTCTTCTTGGAGACGACCAGATTTATAATGTAATTGTTACAGCACATGCTTTTGTAATAATTTTCTTTATAGTAATACCAATCATGATCGGAGGGTTTGGGAACTGACTAATCCCACTAATGATCGGAGCCCCTGACATGGCATTCCCCCGAATGAACAACATGAGTTTTTGACTCCTCCCGCCCTCCTTCCTACTTCTATTAGCCTCTTCAGGCGTAGAAGCCGGAGCCGGGACTGGATGAACAGTCTACCCCCCTCTAGCAGGGAACCTCGCACACGCAGGAGCATCTGTTGACCTAACTATCTTCTC…	Lutjanus russellii, Lutjanus monostigma, Lutjanus indicus, Lutjanus cf. russellii, Lutjanus johnii	Product substitution
		Ambrose University	Sept 26 2020	2020	Kinjo Sushi & Grill	Sushi	Tai - Red Snapper	$3.90/2 pc	CACCCTCTATCTAGTATTTGGTGCTTGAGCCGGAATAGTAGGAACTGCACTAAGCCTCCTAATTCGGGCAGAACTAAGCCAGCCCGGCTCTCTTCTCGGAGACGACCAAATCTATAATGTAATTGTTACAGCACATGCTTTCGTAATAATTTTCTTTATAGTAATACCAATTATGATTGGAGGCTTTGGAAACTGACTAGTACCCCTCATGATTGGTGCACCAGACATGGCCTTCCCTCGAATAAATAACATGAGCTTTTGACTTCTCCCCCCCTCATTTCTTCTTCTTCTCGCCTCATCTGGAGTCGAAGCAGGTGCCGGCACAGGATGGACTGTTTATCCCCCGCTCGCAGGCAATCTTGCCCACGCTGGACCTTCTGTTGACTTAACCATCTTCTC…	Oreochromis sp., Oreochromis niloticus, O. aureus x niloticus, O. mossambicus, 9 other Oreochromis lineages	Product substitution
		Ambrose University	Sept 23 2020	2020	Save on Foods	Grocery	Smoked Salmon Roll	$0.73/pc	CACCCTCTATTTAGTATTTGGTGCCTGAGCCGGGATAGTCGGCACCGCCCTAAGCCTACTGATTCGGGCAGAACTAAGCCAGCCAGGCGCTCTTCTAGGAGATGACCAGATCTATAACGTAATCGTCACAGCCCATGCCTTCGTTATGATTTTCTTTATAGTCATACCAATTATAATCGGAGGATTTGGAAACTGATTAATCCCCCTAATAATCGGAGCCCCCGATATGGCATTCCCACGAATAAATAACATAAGCTTCTGACTCCTCCCCCCCTCGTTTCTCCTCCTCCTATCTTCATCTGGAGTTGAAGCCGGCGCTGGTACCGGATGAACAGTTTATCCCCCTCTGGCCGGAAACCTTGCCCACGCGGGAGCCTCTGTTGACTTAACCATCTTCTC…	Oncorhynchus nerka	Product substitution
		Ambrose University	Sept 19 2020	2020	Sushi and Kitchen	Sushi	Salmon Sashimi	$1.30/pc	CACCCTCTATTTAGTATTTGGTGCCTGAGCCGGAATAGTCGGCACCGCCCTAAGTCTCTTGATTCGAGCAGAACTCAGCCAGCCTGGCGCCCTTCTGGGAGATGACCAAATTTATAACGTAATTGTTACAGCCCATGCCTTCGTCATAATTTTCTTTATAGTCATACCGATTATGATCGGCGGCTTTGGAAACTGATTAATTCCTCTTATAATCGGGGCCCCCGACATAGCATTCCCCCGAATGAATAACATAAGTTTTTGACTTCTCCCTCCCTCCTTTCTTCTCCTCCTGGCCTCATCTGGAGTTGAAGCCGGCGCTGGCACCGGATGAACAGTCTACCCCCCTCTAGCAGGTAATCTTGCCCACGCAGGAGCTTCCGTTGACTTAACTATTTTTTC…	Salmo salar	Not mislabeled
		Ambrose University	Sept 23 2020	2020	Kinjo Sushi & Grill	Sushi	Salmon	$1.95/pc	CACCCTCTATTTAGTATTTGGTGCCTGAGCCGGAATAGTCGGCACCGCCCTAAGTCTCTTGATTCGAGCAGAACTCAGCCAGCCTGGCGCCCTTCTGGGAGATGACCAAATTTATAACGTAATTGTTACAGCCCATGCCTTCGTCATAATTTTCTTTATAGTCATACCGATTATGATCGGCGGCTTTGGAAACTGATTAATTCCTCTTATAATCGGGGCCCCCGACATAGCATTCCCCCGAATGAATAACATAAGTTTTTGACTTCTCCCTCCCTCCTTTCTTCTCCTCCTGGCCTCATCTGGAGTTGAAGCCGGCGCTGGCACCGGATGAACAGTCTACCCCCCTCTAGCAGGTAATCTTGCCCACGCAGGAGCTTCCGTTGACTTAACTATTTTTTC…	Salmo salar	Not mislabeled
		Ambrose University	Sept 20 2020	2020	City Market	Grocery	MSC Fresh Wild Sockeye Salmon Steaks	$1.23/kg	TAAGCCAGCCAGGCGCTCTTNTAGGAGATGACCAGATCTATAACGTAATCGTCACAGCCCATGCCTTCGTTATGATTTTCTTTATAGTCATACCAATTATAATCGGAGGATTTGGAAACTGATTAATCCCT-TAATAATCGGAGCCCCCGATATGGCATTCCCACGAATAAATAACATAAGCTTCTGACTCCTCCCCCCCTCGTTTCTCCTCCTCCTATCTTCATCTGGAGTTGAAGCCGGCGCTGGTACCGGATGAACAGTTTATCCCCCTCTGGCCGGAAACCTTGCCCACGCGGGAGCCTCTGTTGACTTAACCATCTTCTCCCTTCATTTAGCTGGAATTTCCTCAATTTTAGGAGCCATTAATTTTATCACAACCATTATTAATATGAAGCCCC…	Oncorhynchus nerka	Not mislabeled
		Ambrose University	Sept 23 2020	2020	Kinjo Sushi	Sushi	Tuna	$1.95/pc	CACCCTCTATCTAGTATTCGGTGCATGAGCTGGAATAGTTGGCACGGCCTTAAGCTTGCTCATCCGAGCTGAACTAAGCCAACCAGGTGCCCTTCTTGGGGACGACCAGATCTACAATGTAATCGTTACGGCCCATGCCTTCGTAATGATTTTCTTTATAGTAATACCAATTATGATTGGAGGATTTGGAAACTGACTTATTCCTCTAATGATCGGAGCCCCCGACATGGCATTCCCACGAATGAACAACATGAGCTTCTGACTCCTTCCTCCCTCTTTCCTTCTGCTCCTAGCTTCTTCAGGAGTTGAGGCTGGGGCCGGAACCGGTTGAACAGTCTACCCTCCCCTTGCCGGCAACCTAGCCCACGCAGGGGCATCAGTTGACCTAACTATTTTCTC…	Thunnus alalunga, T. obesus, T. orientalis, T. thynnus	Not mislabeled
		Ambrose University	Sept 20 2020	2020	Macleod Trail Co-op	Grocery	Walleye Fillets - Fresh Wild	$42.90/kg	CACCCTTTATCTAGTATTTGGTGCTTGAGCCGGAATAGTGGGCACAGCTCTAAGCCTACTCATCCGAGCGGAACTAAGCCAACCCGGCGCTCTCCTTGGAGACGACCAAATTTATAACGTAATTGTTACGGCACATGCCTTTGTAATAATCTTCTTTATAGTAATACCCATTATGATTGGAGGTTTTGGGAATTGACTCATCCCACTCATAATTGGTGCCCCCGATATAGCATTCCCTCGAATAAATAACATAAGCTTTTGACTTCTGCCCCCCTCTTTCCTTCTCCTTCTTGCCTCCTCAGGGGTTGAGGCAGGAGCTGGTACCGGGTGGACTGTTTATCCCCCATTAGCTGGAAACCTGGCACACGCCGGGGCATCTGTCGACTTAACCATTTTTTC…	Sander vitreus	Not mislabeled
		Ambrose University	Sept 24 2020	2020	Co-op	Grocery	Sticker: Yellow Fin Tuna Loin Steak Wild; Rack label: Yellow Fin Tuna Loin Steak	$29.90/kg	CACCCTTTATCTAGTATTCGGTGCATGAGCTGGAATAGTTGGCACGGCCTTAAGCTTGCTCATCCGAGCTGAACTAAGCCAACCAGGTGCCCTTCTTGGGGACGACCAGATCTACAATGTAATCGTTACGGCCCATGCCTTCGTAATGATTTTCTTTATAGTAATACCAATTATGATTGGAGGATTTGGAAACTGACTTATTCCTCTAATGATCGGAGCCCCCGACATGGCATTCCCACGAATGAACAACATGAGCTTCTGACTCCTTCCCCCCTCTTTCCTTCTGCTCCTAGCTTCTTCAGGAGTTGAGGCTGGAGCCGGAACCGGTTGAACAGTCTACCCTCCCCTTGCCGGCAACCTGGCCCACGCAGGGGCATCAGTTGACCTAACTATTTTCTC…	Thunnus albacares	Not mislabeled
		Ambrose University	Sept 24 2020	2020	Co-op	Grocery	Yellow Fin Tuna Loin Steak Wild	$29.90/kg	CACCCTTTATCTAGTATTCGGTGCATGAGCTGGAATAGTTGGCACGGCCTTAAGCTTGCTCATCCGAGCTGAACTAAGCCAACCAGGTGCCCTTCTTGGGGACGACCAGATCTACAATGTAATCGTTACGGCCCATGCCTTCGTAATGATTTTCTTTATAGTAATACCAATTATGATTGGAGGATTTGGAAACTGACTTATTCCTCTAATGATCGGAGCCCCCGACATGGCATTCCCACGAATGAACAACATGAGCTTCTGACTCCTTCCCCCCTCTTTCCTTCTGCTCCTAGCTTCTTCAGGAGTTGAGGCTGGAGCCGGAACCGGTTGAACAGTCTACCCTCCCCTTGCCGGCAACCTGGCCCACGCAGGGGCATCAGTTGACCTAACTATTTTCTC…	Thunnus albacares	Not mislabeled
		Mount Royal University		2017		Sushi	Tuna (ahi)		CACCCTCTATCTAGTATTCGGTGCATGAGCTGGAATAGTTGGCACGGCCTTAAGCTTGCTCATCCGAGCTGAACTAAGCCAACCAGGTGCCCTTCTTGGGGACGACCAGATCTACAATGTAATCGTTACGGCCCATGCCTTCGTAATGATTTTCTTTATAGTAATACCAATTATGATTGGAGGATTTGGAAACTGACTTATTCCTCTAATGATCGGAGCCCCCGACATGGCATTCCCACGAATGAACAACATGAGCTTCTGACTCCTTCCCCCCTCTTTCCTTCTGCTTCTAGCTTCTTCAGGAGTTGAGGCTGGAGCCGGAACCGGTTGAACAGTCTACCCTCCCCTTGCCGGCAACCTGGCCCACGCAGGGGCATCAGTTGACCTAACTATTTTCTC…	Thunnus obesus, T. sp	Product substitution
		Mount Royal University		2017		Grocery	Cod		GCCGGAAACCTCGCTCATGCTGGGGCATCTGTTGATCTCACTATTTTTTCTCTCCATCTAGCAGGGATTTCATCAATTCTTGGGGCAATTAATTTTATTACCACAATTATTAATATGAAACCTCCAGCAATTTCACAGTA	Gadus macrocephalus, Gadus ogac, Boreogadus saida	Not mislabeled
		Mount Royal University		2017		Grocery	Halibut		CACCCTCTATCTCGTATTTGGTGCCTGAGCCGGAATAGTGGGGACAGGCCTAAGTCTGCTTATTCGGGCAGAACTAAGCCAACCCGGGGCTCTCCTGGGAGACGACCAAATTTATAATGTAATCGTCACCGCACACGCCTTTGTAATAATCTTTTTTATAGTAATACCCATTATGATTGGGGGGTTCGGAAACTGGCTTATTCCACTAATAATTGGGGCCCCAGATATGGCGTTCCCTCGAATGAATAATATGAGTTTCTGACTTCTTCCCCCCTCCTTTCTCCTCCTCTTAGCCTCTTCAGGTGTTGAAGCCGGAGCAGGTACCGGATGAACCGTATACCCCCCACTAGCTGGCAATTTAGCCCACGCCGGAGCATCCGTAGACCTGACAATCTTCTC…	Hippoglossus stenolepis , H. hippoglossus	Not mislabeled
		Mount Royal University		2017		Grocery	Marlin		CACCCTCTATCTAGTATTCGGTGCTTGAGCCGGAATGGTGGGCACTGCCCTGAGCCTTCTAATTCGAGCTGAACTTAGCCAACCTGGCGCTTTACTAGGCGATGATCAAATTTATAACGTAATCGTTACAGCCCACGCCTTCGTAATAATCTTCTTTATAGTAATGCCAATTATGATTGGAGGTTTCGGAAACTGACTGATTCCTCTAATGATCGGAGCCCCAGACATGGCCTTCCCTCGAATAAACAACATGAGCTTTTGACTGCTCCCTCCCTCATTCCTTCTTCTCCTCGCCTCCTCCGGAGTTGAAGCCGGGGCCGGCACAGGGTGAACCGTTTACCCGCCTCTAGCAGGTAACCTAGCCCACGCAGGAGCATCTGTTGACCTAACTATTTTTTC…	Istiompax indica, Makaira nigricans	Product substitution
		Mount Royal University		2017		Grocery	Pacific cod		CACCCTTTATCTNGTATTTGGTGCCTGAGCCGGCATAGTCGGAACAGCCCTAAGCCTGCTCATTCGAGCAGAGCTAAGTCAACCTGGTGCACTTCTTGGTGATGATCAAATTTATAATGTGATCGTTACAGCGCACGCTTTCGTAATAATTTTCTTTATAGTAATACCACTAATAATTGGAGGCTTTGGGAACTGACTCATTCCTCTAATGATCGGTGCACCAGATATAGCTTTCCCTCGAATAAATAACATAAGCTTCTGACTTCTTCCTCCATCTTTCCTGCTCCTTTTAGCATCCTCTGGTGTAGAAGCTGGGGCTGGAACAGGCTGAACTGTCTATCCACCTTTAGCCGGAAACCTCGCTCATGCTGGGGCATCTGTTGATCTCACTATTTTTTC…	Gadus morhua	Product substitution
		Mount Royal University		2017		Grocery	Salmon		CACCCTCTATTTAGTATTTGGTGCCTGAGCCGGGATAGTAGGCACCGCCCTTAGTCTACTGATTCGGGCAGAACTAAGCCAGCCGGGCGCTCTTCTAGGGGATGACCAGATCTATAACGTGATCGTCACAGCCCATGCCTTCGTTATGATTTTCTTTATAGTTATGCCGATTATGATCGGAGGCTTTGGAAACTGATTAATTCCCCTAATGATCGGGGCCCCTGATATGGCATTCCCTCGAATAAATAACATAAGCTTCTGACTCCTTCCACCATCCTTTCTCCTCCTCCTATCTTCCTCTGGAGTTGAAGCCGGAGCTGGCACCGGGTGAACAGTCTACCCCCCTCTGGCCGGCAACCTAGCCCACGCAGGAGCCTCAGTTGATCTGACGATCTTCTC…	Oncorhynchus tshawytscha	Product substitution
		Mount Royal University		2017		Grocery	Salmon		CACCCTCTATTTAGTATTTGGTGCNTGAGCCGGAATAGTCGGCACCGCCCTAAGTCTCTTGATTCGAGCAGAACTCAGCCAGCCTGGCGCCCTTCTGGGAGATGACCAAATTTATAACGTAATTGTTACAGCCCATGCCTTCGTCATAATTTTCTTTATAGTCATACCGATTATGATCGGCGGCTTTGGAAACTGATTAATTCCTCTTATAATCGGGGCCCCCGACATAGCATTCCCCCGAATGAATAACATAAGTTTTTGACTTCTCCCTCCCTCCTTTCTTCTCCTCCTGGCCTCATCTGGAGTTGAAGCCGGCGCTGGCACCGGATGAACAGTCTACCCCCCTCTAGCAGGGAATCTTGCCCACGCAGGAGCTTCCGTTGACTTAACTATTTTTTC…	Salmo salar	Not mislabeled
		Mount Royal University		2017		Grocery	Tilapia		GGAATAGTAGGAACTGCACTAAGCCTCCTAATTCGGGCAGAACTAAGCCAGCCCGGCTCTCTTCTCGGAGACGACCAAATCTATAATGTAATTGTTACAGCACATGCTTTCGTAATAATTTTCTTTATAGTAATACCAATTATGATTGGAGGCTTTGGAAACTGACTAGTACCCCTCATGATTGGTGCACCAGACATGGCCTTCCCTCGAATAAATAACATGAGCTTTTGACTTCTCCCCCCCTCATTTCTTCTTCTTCTCGCCTCATCTGGAGTNGAAGCAGGTGCCGGCACAGGATGGACTGTTTATCCCCCGCTCGCAGGCAATCTTGCCCACGCTGGACCTTNTGTTGACTTAACCATCTTCTCCCTCCACTTGGCCGGAGTGTCATNTATTTTA…	Oreochromis sp., O. niloticus, O. aureus, O. aureus x niloticus, O. mossambicus, 14 O. sp.	Not mislabeled
		Mount Royal University		2017		Grocery	Trout		CACCCTCTATTTAGTATTTGGTGCCTGAGCCGGGATAGTAGGCACCGCCCTGAGTCTACTGATTCGGGCGGAACTAAGCCAGCCGGGCGCTCTTCTGGGGGATGACCAAATCTATAACGTGATCGTCACAGCCCATGCCTTCGTTATGATTTTCTTTATAGTCATGCCAATTATAATCGGGGGCTTTGGAAACTGATTAATTCCCCTAATAATCGGAGCCCCTGATATGGCATTCCCTCGAATAAATAACATAAGCTTCTGACTCCTTCCTCCATCCTTTCTCCTCCTCCTGTCTTCATCAGGAGTTGAAGCCGGCGCGGGTACTGGATGAACAGTATACCCCCCTCTAGCCGGCAACCTCGCCCACGCAGGAGCCTCTGTTGATTTAACTATCTTCTC…	Oncorhynchus mykiss, sp	Not mislabeled
		Mount Royal University		2017		Grocery	Whitefish		CACCCTTTATTTAGTATTTGGTGCCTGAGCCGGAATAGTCGGCACCGCCCTTAGCCTCTTGATCCGGGCAGAGTTAAGCCAACCCGGAGCTCTTCTAGGGGATGACCAGATCTATAACGTAATCGTAACAGCCCATGCCTTCGTTATGATTTTCTTTATAGTCATACCAATTATGATCGGGGGCTTTGGAAACTGATTAATCCCTCTAATAATTGGGGCCCCAGACATAGCATTCCCTCGAATAAATAACATAAGCTTCTGACTCCTCCCACCGTCCTTTCTCCTTCTCCTGGCTTCGTCAGGGGTTGAAGCTGGCGCCGGTACGGGATGGACAGTCTACCCCCCTCTAGCCGGGAACCTCGCCCACGCAGGGGCCTCCGTTGATTTAACTATCTTCTC…	Salvelinus alpinus, Salvelinus boganidae, Salvelinus umbla, Salvelinus evasus, 9 other Salvelinus sp.	Product substitution
	BOLD-W43	Mount Royal University	Sept 24 2019	2019	Co-op	Grocery	Wild Alaskan Cod Loin Fillet		CCTTTATCTCGTATTTGGTGCCTGAGCCGGCATAGTCGGAACAGCCCTAAGCCTACTCATTCGAGCAGAGCTAAGTCAACCTGGTGCACTCCTAGGTGATGATCAAATTTATAATGTGATCGTTACAGCGCACGCTTTCGTAATAATTTTCTTTATAGTAATACCACTAATAATTGGAGGCTTTGGGAACTGACTCATTCCTCTAATGATCGGTGCCCCCGATATAGCTTTCCCTCGAATAAATAACATAAGCTTCTGGCTTCTCCCTCCATCTTTCCTGCTCCTTTTAGCATCCTCTGGTGTAGAAGCTGGAGCTGGAACAGGCTGAACTGTCTACCCACCTTTAGCCGGAAACCTCGCTCATGCTGGGGCATCTGTTGATCTCACTATTTTTTCTCT…	Boreogadus saida (99.82%), Gadus ogac, Gadus macrocephalus	Invalid market name
	BOLD-S39	Mount Royal University	Sept 28 2019	2019	Safeway	Grocery	Fresh Atlantic salmon fillets		CCCAGCTATCTCTCAGTATCAAACCCCACTTTTTGTTTGAGCTGTATTAGTCACTGCCGTCCTTTTGTTACTCTCCCTCCCTGTTCTAGCAGCAGGCATTACCATACTACTTACAGACCGAAATCTAAATACCACTTTCTTTGACCCGGCAGGCGGAGGAGACCCAATA	Salmo salar	Not mislabeled
	BOLD-0V9	Mount Royal University	Sept 29 2019	2019	Co-op	Grocery	Atlantic salmon	8.94	CCCAGCTATCTCTCAGTATCAAACCCCACTTTTTGTTTGAGCTGTATTAGTCACTGCCGTCCTTTTGTTACTCTCCCTCCCTGTTCTAGCAGCAGGCATTACCATACTACTTACAGACCGAAATCTAAATACCACTTTCTTTGACCCGGCAGGCGGAGGAGACCCAATCT	Salmo salar	Not mislabeled
	BOLD-9N3	Mount Royal University	Sept 30 2019	2019	Co-op	Grocery	Atlantic salmon fillet	2	CCCAGCTATCTCTCAGTATCAAACCCCACTTTTTGTTTGAGCTGTATTAGTCACTGCCGTCCTTTTGTTACTCTCCCTCCCTGTTCTAGCAGCAGGCATTACCATACTACTTACAGACCGAAATCTAAATACCACTTTCTTTGACCCGGCAGGCGGAGGAGACCCAATC	Salmo salar	Not mislabeled
	BOLD-F79	Mount Royal University	Sept 28 2019	2019	Superstore	Grocery	Fresh Atlantic Salmon	8.96	CCCAGCTATCTCTCAGTATCAAACCCCACTTTTTGTTTGAGCTGTATTAGTCACTGCCGTCCTTTTGTTACTCTCCCTCCCTGTTCTAGCAGCAGGCATTACCATACTACTTACAGACCGAAATCTAAATACCACTTTCTTTGACCCGGCAGGCGGAGGAGACCCAATCT	Salmo salar	Not mislabeled
	BOLD-O06	Mount Royal University	Sept 22 2019	2019	Superstore	Grocery	basa fillets	10	CCTCTACCTAGTATTTGGTGCCTGAGCAGGAATAGTTGGTACGGCCCTCAGCCTCCTAATTCGGGCAGAGCTAGCCCAACCCGGCGCCCTTCTAGGCGACGACCAAATTTATAATGTTATTGTCACTGCCCATGCCTTCGTAATAATTTTCTTTATAGTAATACCAATTATAATTGGAGGCTTTGGAAACTGACTTGTCCCCTTAATAATTGGAGCGCCTGATATGGCATTCCCTCGAATAAATAATATGAGTTTTTGATTACTTCCGCCTTCCTTCCTACTATTGCTTGCCTCCTCTGGAGTAGAAGCAGGGGCAGGAACAGGATGAACTGTATATCCACCCCTTGCTGGAAACCTCGCACATGCCGGGGCTTCTGTAGATTTAACTATTTTCTCCCT…	Pangasius bocourti, P. djambal Pangasianodon hypophthalmus	Not mislabeled
	BOLD-276	Mount Royal University	Sept 30 2019	2019	Safeway	Grocery	basa fillets	3.9	ACCAGCAATTTCACAATATCAAACACCTTTATTTGTATGGGCTGTCTTAATTACAGCTGTTCTTCTATTATTATCTCTACCAGTACTGGCTGCCGGCATTACTATACTCCTAACAGATCGAAACCTAAATACTACATTCTTTGATCCTGCAGGCGGAGGAGATCCTAT	Pangasius bocourti, P. djambal Pangasianodon hypophthalmus	Not mislabeled
	BOLD-SK3	Mount Royal University	Sept 28 2019	2019	Co-op	Grocery	Chinook salmon fillets	15.75	TGAGCCGGGATAGTAGGCACCGCCCTTAGTCTACTGATTCGGGCAGAACTAAGCCAGCCGGGCGCTCTTCTAGGGGATGACCAGATCTATAACGTGATCGTCACAGCCCATGCCTTCGTTATGATTTTCTTTATAGTTATGCCGATTATGATCGGAGGCTTTGGAAACTGATTAATTCCCCTAATGATCGGGGCCCCTGATATGGCATTCCCTCGAATAAATAACATAAGCTTCTGACTCCTTCCACCATCCTTTCTCCTCCTCCTATCTTCCTCTGGAGTTGAAGCCGGAGCTGGCACCGGGTGAACAGTCTACCCCCCTCTGGCCGGCAACCTAGCCCACGCAGGAGCCTCAGTTGATCTGACGATCTTCTCCCTTCATTTAGCCGGGATCTCCTCA…	Oncorhynchus tshawytscha	Not mislabeled
	BOLD-PI2	Mount Royal University	Sept 25 2019	2019	Safeway	Grocery	Fresh cod fillets	4.47	CCTTTATCTCGTATTTGGTGCCTGAGCCGGCATAGTCGGAACAGCCCTAAGCCTGCTCATTCGAGCAGAGCTAAGTCAACCTGGTGCACTTCTTGGTGATGATCAAATTTATAATGTGATCGTTACAGCGCACGCTTTCGTAATAATTTTCTTTATAGTAATACCACTAATAATTGGAGGCTTTGGGAACTGACTCATTCCTCTAATGATCGGTGCACCAGATATAGCTTTCCCTCGAATAAATAACATAAGCTTCTGACTTCTTCCTCCATCTTTCCTGCTCCTTTTAGCATCCTCTGGTGTAGAAGCTGGGGCTGGAACAGGCTGAACTGTCTATCCACCTTTAGCCGGAAACCTCGCTCATGCTGGGGCATCTGTTGATCTCACTATTTTTTCTCT…	Gadus morhua	Not mislabeled
	BOLD-GH9	Mount Royal University	Sept 28 2019	2019	Co-op	Grocery	Cod fillets	11.34	CCTTTATCTCGTATTTGGTGCCTGAGCCGGCATAGTCGGAACAGCCCTAAGCCTGCTCATTCGAGCAGAGCTAAGTCAACCTGGTGCACTTCTTGGTGACGATCAAATTTATAATGTGATCGTTACAGCGCACGCTTTCGTAATAATTTTCTTTATAGTAATACCACTAATAATTGGAGGCTTTGGGAACTGACTCATTCCTCTAATGATCGGTGCACCAGATATAGCTTTCCCTCGAATAAATAACATAAGCTTCTGACTTCTTCCTCCATCTTTCCTGCTCCTTTTAGCATCCTCTGGTGTAGAAGCTGGGGCTGGAACAGGCTGAACTGTCTATCCACCTTTAGCCGGAAATCTCGCTCATGCTGGGGCATCTGTTGATCTCACTATTTTTTCTCT…	Gadus morhua	Not mislabeled
	BOLD-9H5	Mount Royal University	Sept 28 2019	2019	Sobeys	Grocery	Freesh cod fillets	2.72	TAAGTCAACCTGGTGCACTTCTTGGTGATGATCAAATTTATAATGTGATCGTTACAGCGCACGCTTTCGTAATAATTTTCTTTATAGTAATACCANTAATAATTGGAGGCTTTGGGAANTGACTCATTCCTNTAATGATCGGTGCACCAGATATAGCTTTCCCTNGAATAAATAACATAAGCTTNTGACTTCTTCCTCCATCTTTCCTACTCCTTTTAGCATCCTCTGGTGTAGAAGCTGGGGCTGGAACAGGCTGAACTGTCTATCCACCTTTAGCCGGAAACCTCGCTCATGNTGGGGCATCTGTTGATCTCACTATTTTTTCTCTTCATCTAGCAGGGATTTCATCAATTCTTGGGGCAATTAATTTTATTACCACAATTATTAATATGAAACCTC…	Gadus morhua	Not mislabeled
	BOLD-A74	Mount Royal University	Sept 30 2019	2019	Safeway	Grocery	Fresh cod fillets	8.52	CCTTTATCTCGTATTTGGTGCCTGAGCCGGCATAGTCGGAACAGCCCTAAGCCTGCTCATTCGAGCAGAGCTAAGTCAACCTGGTGCACTTCTTGGTGATGATCAAATTTATAATGTGATCGTTACAGCGCACGCTTTCGTAATAATTTTCTTTATAGTAATACCACTAATAATTGGAGGCTTTGGGAACTGACTCATTCCTCTAATGATCGGTGCACCAGATATAGCTTTCCCTCGAATAAATAACATAAGCTTCTGACTTCTTCCTCCATCTTTCCTGCTCCTTTTAGCATCCTCTGGTGTAGAAGCTGGGGCTGGAACAGGCTGAACTGTCTATCCACCTTTAGCCGGAAACCTCGCTCATGCTGGGGCATCTGTTGATCTCACTATTTTTTCTCT…	Gadus morhua	Not mislabeled
	BOLD-GT3	Mount Royal University	Sept 30 2019	2019	Safeway	Grocery	Fresh cod fillets	4.61	CCTTTATCTCGTATTTGGTGCCTGAGCCGGCATAGTCGGAACAGCCCTAAGCCTGCTCATTCGAGCAGAGCTAAGTCAACCTGGTGCACTTCTTGGTGATGATCAAATTTATAATGTGATCGTTACAGCGCACGCTTTCGTAATAATTTTCTTTATAGTAATACCACTAATAATTGGAGGCTTTGGGAACTGACTCATTCCTCTAATGATCGGTGCACCAGATATAGCTTTCCCTCGAATAAATAACATAAGCTTCTGACTTCTTCCTCCATCTTTCCTGCTCCTTTTAGCATCCTCTGGTGTAGAAGCTGGGGCTGGAACAGGCTGAACTGTCTATCCACCTTTAGCCGGAAACCTCGCTCATGCTGGGGCATCTGTTGATCTCACTATTTTTTCTCT…	Gadus morhua	Not mislabeled
	BOLD-DJ6	Mount Royal University	Sept 29 2019	2019	Superstore	Grocery	Boneless Cod Fillets	4.85	CCTTTATCTCGTATTTGGTGCCTGAGCCGGCATAGTCGGAACAGCCCTAAGCCTACTCATTCGAGCAGAGCTAAGTCAACCTGGTGCACTCCTAGGTGATGATCAAATTTATAATGTGATCGTTACAGCGCACGCTTTCGTAATAATTTTCTTTATAGTAATACCACTAATAATTGGAGGCTTTGGGAACTGACTCATTCCTCTAATGATCGGTGCCCCCGATATAGCTTTCCCTCGAATAAATAACATAAGCTTCTGACTTCTCCCTCCATCTTTCCTGCTCCTTTTAGCATCCTCTGGTGTAGAAGCTGGAGCTGGAACAGGCTGAACTGTCTACCCACCTTTAGCCGGAAACCTCGCTCATGCTGGGGCATCTGTTGATCTCACTATTTTTTCTCT…	Boreogadus saida, Gadus ogac, Gadus macrocephalus	Not mislabeled
	BOLD-LC5	Mount Royal University	Sept 29 2019	2019	Walmart	Grocery	Cod fillets		TGAGCCGGCATAGTCGGAACAGCCCTAAGCCTACTCATTCGAGCAGAGCTAAGTCAACCTGGTGCACTCCTAGGTGATGATCAAATTTATAATGTGATCGTTACAGCGCACGCTTTCGTAATAATTTTCTTTATAGTAATACCACTAATAATTGGAGGCTTTGGGAACTGACTCATTCCTCTAATGATCGGTGCCCCCGATATAGCTTTCCCTCGAATAAATAACATAAGCTTCTGACTTCTCCCTCCATCTTTCCTGCTCCTTTTAGCATCCTCTGGTGTAGAAGCTGGAGCTGGAACAGGCTGAACTGTCTACCCACCTTTAGCCGGAAACCTCGCTCATGCTGGGGCATCTGTTGATCTCACTATTTTTTCTCTCCATCTAGCAGGGATTTCATCA…	Boreogadus saida, Gadus ogac, Gadus macrocephalus	Not mislabeled
	BOLD-G81	Mount Royal University	Sept 27 2019	2019	Co-op	Grocery	Farmed Coho Salmon		CCTCTATTTAGTATTTGGTGCCTGAGCCGGGATAGTAGGCACCGCCCTAAGTCTACTGATTCGAGCAGAACTGAGCCAGCCGGGCGCTCTTCTAGGGGATGATCAGATTTACAACGTAATCGTCACAGCCCATGCCTTCGTTATGATTTTCTTTATAGTCATGCCGATTATGATCGGAGGCTTTGGAAACTGATTAATCCCCCTAATGATCGGAGCCCCTGATATGGCATTCCCTCGAATAAATAACATAAGCTTCTGACTCCTTCCGCCATCCTTTCTCCTCCTCCTATCTTCCTCTGGAGTTGAAGCCGGGGCTGGCACCGGGTGAACAGTTTATCCCCCTCTGGCCGGCAACCTCGCCCACGCAGGAGCCTCAGTTGATCTGACTATCTTCTCCCT…	Oncorhynchus kisutch, O. tshawytscha	Not mislabeled
	BOLD-RU8	Mount Royal University	Sept 27 2019	2019	Superstore	Grocery	Fresh MSC Halibut Fillets	14.5	TGGGAGACGACCAAATTTATAATGTAATCGTCACCGCACACGCCTTTGTAATAATCTTTTTTATAGTAATACCCATTATGATTGGGGGGTTCGGAAACTGGCTTATTCCACTAATAATTGGGGCCCCAGATATGGCGTTCCCTCGAATGAATAATATGAGTTTCTGACTTCTTCCCCCCTCCTTTCTCCTCCTCTTAGCCTCTTCAGGTGTTGAAGCCGGAGCAGGTACCGGATGAACCGTATACCCCCCACTAGCTGGCAATTTAGCCCACGCCGGAGCATCCGTAGACCTGACAATCTTCTCACTTCACCTTGCAGGAATTTCATCAATTCTGGGGGCAATTAACTTTATTACTACTATCATTAACATGAAACCCACAACAGTC	Hippoglossus stenolepis, H. hippoglossus	Not mislabeled
	BOLD-ZH4	Mount Royal University	Sept 30 2019	2019	Safeway	Grocery	Fresh Halibut Fillets	10.9	CACAACAGTCACTATGTACCAAATCCCCTTATTTGTTTGAGCCGTTCTTATTACAGCCGTACTTCTTCTTCTATCCCTGCCCGTTTTAGCCGCAGGAATTACAATACTACTAACAGACCGCAACCTTAACACGACCTTCTTTGACCCTGCCGGAGGAGGTGACCCC	Hippoglossus stenolepis, H. hippoglossus	Not mislabeled
	BOLD-R36	Mount Royal University	Sept 22 2019	2019	Superstore	Grocery	New Zealand blue cod fillets	3.96	CCTCTATCTCGTATTTGGTGCCTGAGCCGGCATAGTCGGAACAGCCTTAAGCCTGCTCATTCGAGCAGAACTAAGTCAACCCGGCGCACTCCTCGGTGATGATCAGATTTACAATGTGATCGTTACAGCACACGCTTTCGTAATAATTTTCTTTATAGTAATGCCGCTAATAATTGGGGGCTTCGGGAACTGACTTATCCCTCTAATGATCGGCGCTCCTGACATAGCCTTCCCCCGAATAAATAACATAAGCTTCTGACTTCTCCCTCCCTCGTTCCTTCTTCTTTTAGCATCCTCTGGTGTAGAAGCCGGGGCCGGAACAGGCTGAACTGTATATCCCCCTCTAGCAGGTAACCTCGCTCACGCCGGAGCCTCTGTTGATCTCACTATTTTCTCCCT…	Micromesistius australis	Semantic mislabeling
	BOLD-UG2	Mount Royal University	Sept 21 2019	2019	No Frills	Grocery	Wild Pacific Cod Fillet		CCTTTATCTCGTATTTGGTGCCTGAGCCGGCATAGTCGGAACAGCCCTAAGCCTACTCATTCGAGCAGAGCTAAGTCAACCTGGTGCACTCCTAGGTGATGATCAAATTTATAATGTGATCGTTACAGCGCACGCTTTCGTAATAATTTTCTTTATAGTAATACCACTAATAATTGGAGGCTTTGGGAACTGACTCATTCCTCTAATGATCGGTGCCCCCGATATAGCTTTCCCTCGAATAAATAACATAAGCTTCTGACTTCTCCCCCCATCTTTCCTGCTCCTTTTAGCATCCTCTGGTGTAGAAGCTGGAGCTGGAACAGGCTGAACTGTCTACCCACCTTTAGCCGGAAACCTCGCTCATGCTGGGGCATCTGTTGATCTCACTATTTTTTCTCT…	Gadus macrocephalus (100), Boreogadus saida (99.82), Gadus ogac (99.82)	Not mislabeled
	BOLD-QI2	Mount Royal University	Sept 27 2019	2019	Superstore	Grocery	Wild Pacific Cod Fillets	9.98	TATTTGGTGCCTGAGCCGGCATAGTCGGAACAGCCCTAAGCCTACTCATTCGAGCAGAGCTAAGTCAACCTGGTGCACTCCTAGGTGATGATCAAATTTATAATGTGATCGTTACAGCGCACGCTTTCGTAATAATTTTCTTTATAGTAATACCACTAATAATTGGAGGCTTTGGGAACTGACTCATTCCTCTAATGATCGGTGCCCCCGATATAGCTTTCCCTCGAATAAATAACATAAGCTTCTGACTTCTCCCTCCATCTTTCCTGCTCCTTTTAGCATCCTCTGGTGTAGAAGCTGGAGCTGGAACAGGCTGAACTGTCTACCCACCTTTAGCCGGAAACCTCGCTCATGCTGGGGCATCTGTTGATCTCACTATTTTTTCTCTCCATCTAGCAG…	Boreogadus saida, Gadus ogac, Gadus macrocephalus	Not mislabeled
	BOLD-KH2	Mount Royal University	Sept 29 2019	2019	Superstore	Grocery	Wild pacific salmon		CCTCTATTTAGTATTTGGTGCCTGAGCCGGGATAGTAGGCACCGCCCTAAGCCTACTAATTCGGGCAGAACTAAGCCAGCCAGGCGCTCTTCTAGGGAATGACCAGATCTATAACGTAATCGTTACAGCCCATGCCTTCGTTATGATTTTCTTTATAGTCATACCAATTATAATCGGAGGCTTTGGAAACTGATTAATCCCCCTAATGATCGGGGCACCAGATATAGCATTTCCACGAATAAACAACATAAGCTTCTGACTCCTGCCCCCATCCTTCCTCCTCCTCCTTTCTTCATCTGGAGTCGAAGCCGGCGCTGGTACCGGATGGACAGTTTATCCCCCTCTAGCCGGGAACCTTGCCCACGCAGGAGCATCCGTCGACTTAACTATCTTCTCCCT…	Oncorhynchus gorbuscha	Invalid market name
	BOLD-EX3	Mount Royal University	Sept 28 2019	2019	Sobeys	Grocery	Fresh wild pacific snapper fillets	2.39	CCTTTATCTAGTATTTGGTGCCTGAGCCGGTATAGTAGGCACAGCCCTCAGCCTACTCATTCGAGCAGAACTAAGCCAACCGGGCGCTCTCCTTGGAGACGACCAAATTTATAATGTAATCGTTACAGCACATGCCTTCGTAATGATTTTCTTTATAGTAATGCCAATTATAATTGGAGGTTTTGGAAACTGATTAATTCCCCTAATGATTGGAGCCCCAGATATAGCATTTCCTCGTATAAATAATATAAGTTTCTGACTTCTACCCCCTTCTTTCCTTCTACTACTTGCCTCTTCTGGGGTAGAAGCTGGTGCCGGAACCGGATGAACAGTGTACCCGCCCCTGTCCGGTAATTTAGCCCACGCAGGAGCATCAGTCGATCTGACAATTTTTTCACT…	Sebastes flavidus, S. sp., S. serranoides, S. melanops, S. variabilis	Not mislabeled
	BOLD-WT6	Mount Royal University	Sept 30 2019	2019	Safeway	Grocery	Wild Pacific Snapper Fillets	7.17	CCCGGCCATCTCTCAATACCAGACACCCCTATTTGTATGAGCCGTTCTAATTACCGCTGTTCTTCTCCTTCTCTCCCTACCAGTTCTCGCTGCCGGCATCACAATGCTCCTTACCGACCGAAATCTTAATACCACCTTCTTTGATCCGGCCGGAGGAGGGGATCCAATC	Sebastes sp., S. serranoides, S. flavidus, S. melanops, S. variabilis, S. mystinus	Not mislabeled
	BOLD-QE1	Mount Royal University	Sept 27 2019	2019	Co-op	Grocery	Wild Pacific Yellowtail Snapper		CCTTTATCTAGTATTTGGTGCCTGAGCCGGTATAGTAGGCACAGCCCTCAGCCTACTCATTCGAGCAGAACTAAGCCAACCGGGCGCTCTCCTTGGAGACGACCAAATTTATAATGTAATCGTTACAGCACATGCCTTCGTAATGATTTTCTTTATAGTAATGCCAATTATAATTGGAGGTTTTGGAAACTGATTAATTCCCCTAATGATTGGAGCCCCAGATATAGCATTTCCTCGTATAAATAATATAAGTTTCTGACTTCTACCCCCTTCTTTCCTTCTACTACTTGCCTCTTCTGGGGTAGAAGCTGGTGCCGGAACCGGATGAACAGTGTACCCGCCCCTGTCCGGTAATTTAGCCCACGCAGGAGCATCAGTCGATCTGACAATTTTTTCACT…	Sebastes sp., S. serranoides, S. flavidus, S. melanops, S. variabilis	Product substitution
	BOLD-QV4	Mount Royal University	Sept 28 2019	2019	North Sea Fish Market	Market	Pickerel Fillet	33.19	CCTTTATCTAGTATTTGGTGCTTGAGCCGGAATAGTGGGCACAGCTCTAAGCCTACTCATCCGAGCGGAACTAAGCCAACCCGGCGCTCTCCTTGGAGACGACCAAATTTATAACGTAATTGTTACGGCACATGCCTTTGTAATAATCTTCTTTATAGTAATACCCATTATGATTGGAGGTTTTGGGAATTGACTCATCCCACTCATAATTGGTGCCCCCGATATAGCATTCCCTCGAATAAATAACATAAGCTTTTGACTTCTGCCCCCCTCTTTCCTTCTCCTTCTTGCCTCCTCAGGGGTTGAGGCAGGAGCTGGTACCGGGTGGACTGTTTATCCCCCATTAGCTGGAAACCTGGCACACGCCGGGGCATCTGTCGACTTAACCATTTTTTCTCT…	Sander vitreus	Not mislabeled
	BOLD-5H8	Mount Royal University	Sept 30 2019	2019	Superstore	Grocery	Frozen Red Snapper		CCTCTATCTAGTATTTGGTGCTTGAGCCGGAATAGTAGGCACCGCCCTAAGCCTGCTCATTCGAGCAGAACTTAGTCAACCAGGGGCCCTCCTTGGGGACGACCAGATCTACAATGTAATCGTTACGGCACATGCATTCGTAATGATTTTCTTTATAGTAATGCCAATCATAATCGGGGGATTTGGAAACTGACTAATCCCACTTATAATCGGAGCCCCCGACATGGCATTCCCCCGAATAAATAACATGAGCTTTTGACTTCTGCCCCCCTCTTTCCTTCTCCTGCTCGCATCTTCTGGGGTAGAAGCTGGAGCCGGAACCGGGTGAACAGTTTATCCTCCATTGGCAGGGAACCTGGCACACGCAGGAGCATCTGTTGACCTAACCATCTTTTCTCT…	Lutjanus malabaricus (99.83), L. erythropterus, L. lutjanus	Product substitution
	BOLD-8O4	Mount Royal University	Sept 27 2019	2019	North Sea Fish Market	Market	Red Snapper		CCTTTATCTAGTATTTGGTGCCTGAGCCGGTATAGTAGGCACAGCCCTCAGCCTACTCATTCGAGCAGAACTAAGCCAACCGGGCGCTCTCCTTGGAGACGACCAAATTTATAATGTAATCGTTACAGCACATGCCTTCGTAATGATTTTCTTTATAGTAATGCCAATTATAATTGGAGGTTTTGGAAACTGATTAATTCCCCTAATGATTGGAGCCCCAGATATAGCATTTCCTCGTATAAATAATATAAGTTTCTGACTTCTACCCCCTTCTTTCCTTCTACTACTTGCCTCTTCTGGGGTAGAAGCTGGTGCCGGAACCGGATGAACAGTGTACCCGCCCCTGTCCGGTAATTTAGCCCACGCAGGAGCATCAGTCGATCTGACAATTTTTTCACT…	Sebastes sp., S. serranoides, S. flavidus, S. melanops, S. variabilis	Product substitution
	BOLD-XS5	Mount Royal University	Sept 30 2019	2019	Safeway	Grocery	Wild sockeye salmon	9.98	CCCAGCCATCTCTCAGTACCAGACCCCACTTTTTGTTTGAGCTGTGCTAATCACTGCTGTACTTCTACTACTTTCCCTACCCGTCCTAGCAGCAGGCATTACTATGTTACTTACTGACCGAAATTTAAACACCACTTTCTTTGACCCGGCAGGCGGGGGAGATCCGATTTTATACCAACACC	Oncorhynchus nerka	Not mislabeled
	BOLD-5D8	Mount Royal University	Sept 29 2019	2019	Walmart	Grocery	Wild sockeye salmon	7.14	TGAGCCGGGATAGTCGGCACCGCCCTAAGCCTACTGATTCGGGCAGAACTAAGCCAGCCAGGCGCTCTTCTAGGAGATGACCAGATCTATAACGTAATCGTCACAGCCCATGCCTTCGTTATGATTTTCTTTATAGTCATACCAATTATAATCGGAGGATTTGGAAACTGATTAATCCCTCTAATAATCGGAGCCCCCGATATGGCATTCCCACGAATAAATAACATAAGCTTCTGACTCCTCCCCCCCTCGTTTCTCCTCCTCCTATCTTCATCTGGAGTTGAAGCCGGCGCTGGTACCGGATGAACAGTTTATCCCCCTCTGGCCGGAAACCTTGCCCACGCGGGAGCCTCTGTTGACTTAACCATCTTCTCCCTTCATTTAGCTGGAATTTCCTCA…	Oncorhynchus nerka	Not mislabeled
	BOLD-4R6	Mount Royal University	Sept 28 2019	2019	Safeway	Grocery	Fresh steelhead trout fillet	7.48	TGAGCCGGGATAGTAGGCACCGCCCTGAGTCTACTGATTCGGGCGGAACTAAGCCAGCCGGGCGCTCTTCTGGGGGATGACCAAATCTATAACGTGATCGTCACAGCCCATGCCTTCGTTATGATTTTCTTTATAGTCATGCCAATTATAATCGGGGGCTTTGGAAACTGATTAATTCCCTTAATAATCGGAGCCCCTGATATGGCATTCCCTCGAATAAATAACATAAGCTTCTGACTCCTTCCTCCATCCTTTCTCCTCCTCCTGTCTTCATCAGGAGTTGAAGCCGGCGCGGGTACTGGATGAACAGTATACCCCCCTCTAGCCGGCAACCTCGCCCACGCAGGAGCCTCTGTTGATTTAACTATCTTCTCCCTTCATTTAGCTGGAATCTCCTCA…	Oncorhynchus mykiss	Not mislabeled
	BOLD-TZ7	Mount Royal University	Sept 30 2019	2019	Co-op	Grocery	Snapper fillets Yellowtail	3.82	AGAACTAAGCCAACCGGGCGCTCTCCTTGGAGACGACCAAATTTATAATGTAATCGTTACAGCACATGCCTTCGTAATGATTTTCTTTATAGTAATGCCAATTATAATTGGAGGTTTTGGAAACTGATTAATTCCCCTAATGATTGGAGCCCCAGATATAGCATTTCCTCGTATAAATAATATAAGTTTCTGACTTCTACCCCCTTCTTTCCTTCTACTACTTGCCTCTTCTGGGGTAGAAGCTGGTGCCGGAACCGGATGAACAGTGTACCCGCCCCTGTCCGGTAATTTAGCCCACGCAGGAGCATCAGTCGATCTGACAATTTTTTCACTTCACCTAGCAGGTATTTCCTCAATCCTTGGGGCAATTAATTTTATCACCACAATTATTAATATGAA…	Sebastes sp., S. serranoides, S. flavidus, S. melanops, S. variabilis	Product substitution
	BOLD-QX4	SeaChoice	April 28 2017	2017	Safeway	Grocery	Fresh Halibut		GGCACCCTCTATCTCGTATTTGGTGCCTGAGCCGGAATAGTGGGGACAGGCCTAAGTCTGCTTATTCGGGCAGAACTAAGCCAACCCGGGGCTCTCCTGGGAGACGACCAAATTTATAATGTAATCGTCACCGCACACGCCTTTGTAATAATCTTTTTTATAGTAATACCCATTATGATTGGGGGGTTCGGAAACTGGCTTATTCCACTAATAATTGGGGCCCCAGATATGGCGTTCCCTCGAATGAATAATATGAGTTTCTGACTTCTTCCCCCCTCCTTTCTCCTCCTCTTAGCCTCTTCAGGTGTTGAAGCCGGAGCAGGTACCGGATGAACCGTGTACCCCCCACTAGCTGGCAATTTAGCCCACGCCGGAGCATCCGTAGACCTGACAATCTTC…	Hippoglossus stenolepis, H. hippoglossus	Not mislabeled
	BOLD-GH7	SeaChoice	May 18 2017	2017	Safeway	Grocery	Halibut fillet		GAGCCGGAATAGTGGGGACAGGCCTAAGTCTGCTTATTCGGGCAGAACTAAGCCAACCCGGGGCTCTCNTGGGAGACGACCAAATTTATAATGTAATCGTCACCGCACACGCCTTTGTAATAATCTTTTTTATAGTAATACCCATTATGATTGGGGGGTTCGGAAACTGGCTTATTCCACTAATAATTGGGGCCCCAGATATGGCGTTCCCTCGAATGAATAACATGAGTTTCTGACTTCTTCCCCCCTCCTTTCTCCTCCTCTTAGCCTCTTCAGGGGTTGAAGCCGGAGCAGGTACCGGATGAACCGTATACCCCCCACTAGCTGGCAATTTAGCCCACGCCGGGGCATCCGTAGACCTGACAATCTTCTCACTTCACCTTGCAGGAATTTCATCAA…	Hippoglossus stenolepis (99.84%), H. hippoglossus	Not mislabeled
	BOLD-W52	SeaChoice	June 3 2017	2017	Co-op	Grocery	Pickerel Fillets Fresh - Wild		CCCTGCTATTTCTCAATACCAGACCCCTTTATTTGTTTGAGCCGTATTAATTACCGCTGTACTTCTACTACTTTCCCTCCCCGTGCTCGCCGCTGGCATTACAATGCTCCTTACGGACCGAAATCTAAACACCACATTCTTTGACCCTGCAGGAGGAGGGG	Sander vitreus	Not mislabeled
	BOLD-UE1	SeaChoice	April 27 2017	2017	Safeway	Grocery	Wild Sockeye Salmon		GGCACCCTCTATTTAGTATTTGGTGCCTGAGCCGGGATAGTCGGCACCGCCCTAAGCCTACTGATTCGGGCAGAACTAAGCCAGCCAGGCGCTCTTCTAGGAGATGACCAGATCTATAACGTAATCGTCACAGCCCATGCCTTCGTTATGATTTTCTTTATAGTCATACCAATTATAATCGGAGGATTTGGAAACTGATTAATCCCTCTAATAATCGGAGCCCCCGATATGGCATTCCCACGAATAAATAACATAAGCTTCTGACTCCTCCCCCCCTCGTTTCTCCTCCTCCTATCTTCATCTGGAGTTGAAGCCGGCGCTGGTACCGGATGAACAGTTTATCCCCCTCTGGCCGGAAACCTTGCCCACGCGGGAGCCTCTGTTGACTTAACCATCTTC…	Oncorhynchus nerka	Not mislabeled
	BOLD-UL3	SeaChoice	May 19 2017	2017	Safeway	Grocery	Wild Sockeye Salmon Fillet		TCCTCCCCCCCTCGTTTCTCCTCCTCCTATCTTCATCTGGAGTTGAAGCNGGCGCTGGTACCGGATGAACAGTTTATCCCCCTCTGGCCGGAAACCTNGCCCACGCGGGAGCCTCTGTTGACTTAACCATCTTCTCCCTTCATTTAGCTGGAATTTCCTCAATTTTAGGAGCCATTAATTTTATCACAACCATTATTAATATGAAGCCCCCAGCCATCTNTCAGTACCAGACCCCACTTTTTGTTTGAG	Oncorhynchus nerka	Not mislabeled
UCFMS015-14	SR06UC	University of Calgary	Sept 15 2014	2014	Safeway	Grocery	Safeway Brand Atlantic Farm Salmon Fillet		CCTCTATTTAGTATTTGGTGCCTGAGCCGGAATAGTCGGCACCGCCCTAAGTCTCTTGATTCGAGCAGAACTCAGCCAGCCTGGCGCCCTTCTGGGAGATGACCAAATTTATAACGTAATTGTTACAGCCCATGCCTTCGTCATAATTTTCTTTATAGTCATACCGATTATGATCGGCGGCTTTGGAAACTGATTAATTCCTCTTATAATCGGGGCCCCCGACATAGCATTCCCCCGAATGAATAACATAAGTTTTTGACTTCTCCCTCCCTCCTTTCTTCTCCTCCTGGCCTCATCTGGAGTTGAAGCCGGCGCTGGCACCGGATGAACAGTCTACCCCCCTCTAGCAGGTAATCTTGCCCACGCAGGAGCTTCCGTTGACTTAACTATTTTTTCCCT…	Salmo salar	Not mislabeled
UCFMS005-14	SR09	University of Calgary	Sept 19 2014	2014	Costco	Grocery	Kirkland Signature Frozen Fish Atlantic Salmon		TAGTATTTGGTGCCTGAGCCGGAATAGTCGGCACCGCCCTAAGTCTCTTGATTCGAGCAGAACTCAGCCAGCCTGGCGCCCTTCTGGGAGATGACCAAATTTATAACGTAATTGTTACAGCCCATGCCTTCGTCATAATTTTCTTTATAGTCATACCGATTATGATCGGCGGCTTTGGAAACTGATTAATTCCTCTTATAATCGGGGCCCCCGACATAGCATTCCCCCGAATGAATAACATAAGTTTTTGACTTCTCCCTCCCTCCTTTCTTCTCCTCCTGGCCTCATCTGGAGTTGAAGCCGGCGCTGGCACCGGATGAACAGTCTACCCCCCTCTAGCAGGTAATCTTGCCCACGCAGGAGCTTCCGTTGACTTAACTATTTTTTCCCTCCATTTGG…	Salmo salar	Not mislabeled
UCFMS011-14	SR10UC	University of Calgary	Sept 21 2014	2014	Safeway	Grocery	Farmed Atlantic Salmon		CTTGATTCGAGCAGAACTCAGCCAGCCTGGCGCCCTTCTGGGAGATGACCAAATTTATAACGTAATTGTTACAGCCCATGCCTTCGTCATAATTTTCTTTATAGTCATACCGATTATGATCGGCGGCTTTGGAAACTGATTAATTCCTCTTATAATCGGGGCCCCCGACATAGCATTCCCCCGAATGAATAACATAAGTTTTTGACTTCTCCCTCCCTCCTTTCTTCTCCTCCTGGCCTCATCTGGAGTTGAAGCCGGCGCTGGCACCGGATGAACAGTCTACCCCCCTCTAGCAGGTAATCTTGCCCACGCAGGAGCTTCCGTTGACTTAACTATTTTTTCCCTCCATTTGGCTGGTATTTCTTCAATTCTTGGGGCCATTAATTTTATTACAACCAT…	Salmo salar	Not mislabeled
UCFMS004-14	SR17UC	University of Calgary	Sept 16 2014	2014	Kilkenny Irish Pub	Restaurant	Breaded Cod		CCTCTATCTCGTATTTGGTGCCTGAGCCGGCATAGTCGGAACAGCCTTAAGNCTGCTCATTCGAGCAGAACTAAGTCAACCCGGCGCACTCCTCGGTGATGATCAGATTTACAATGTGATCGTTACAGCACACGCTTTCGTAATAATTTTCTTTATAGTAATGCCGCTAATAATTGGGGGCTTCGGGAACTGACTTATCCCTCTAATGATCGGCGCTCCTGACATAGCCTTCCCCCGAATAAATAACATAAGCTTCTGACTTCTCCCTCCCTCGTTCCTTCTTCTTTTAGCATCCTCTGGTGTAGAAGCCGGGGCCGGAACAGGCTGAACTGTATATCCCCCTCTAGCAGGCAACCTCGCTCACGCCGGAGCCTCTGTTGATCTCACTATTTTCTCCCT…	Micromesistius australis	Product substitution
MOBIL1890-16	BOLD-0DLPZSRF7	University of Calgary	Sept 25 2014	2014	Co-op	Grocery	Gold d'Or All Natural Cod Fillets (MSC Certified)	7.49	CACCCTTTATCTCGTATTTGGTGCCTGAGCCGGCATAGTCGGAACAGCCCTAAGCCTACTCATTCGAGCAGAGCTAAGTCAACCTGGTGCACTCCTAGGTGATGATCAAATTTATAATGTGATCGTTACAGCGCACGCTTTCGTAATAATTTTCTTTATAGTAATACCACTAATAATTGGAGGCTTTGGGAACTGACTCATTCCTCTAATGATCGGTGCCCCCGATATAGCTTTCCCTCGAATAAATAACATAAGCTTCTGACTTCTCCCTCCATCTTTCCTGCTCCTTTTAGCATCCTCTGGTGTAGAAGCTGGAGCTGGAACAGGCTGAACTGTCTACCCACCTTTAGCCGGAAACCTCGCTCATGCTGGGGCATCTGTTGATCTCACTATTTTTTC…	Gadus macrocephalus, Gadus ogac, Boreogadus saida	Not mislabeled
UCFMS018-14	SR02	University of Calgary	Sept 29 2014	2014	Real Canadian Superstore	Grocery	Fresh Boneless Cod Fillet		CCTTTATCTCGTATTTGGTGCCTGAGCCGGCATAGTCGGAACAGCCCTAAGCCTACTCATTCGAGCAGAGCTAAGTCAACCTGGTGCACTCCTAGGTGATGATCAAATTTATAATGTGATCGTTACAGCGCACGCTTTCGTAATAATTTTCTTTATAGTAATACCACTAATAATTGGAGGCTTTGGGAACTGACTCATTCCTCTAATGATCGGTGCCCCCGATATAGCTTTCCCTCGAATAAATAACATAAGCTTCTGACTTCTCCCTCCATCTTTCCTGCTCCTTTTAGCATCCTCTGGTGTAGAAGCTGGAGCTGGAACAGGCTGAACTGTCTACCCACCTTTAGCCGGAAACCTCGCTCATGCTGGGGCATCTGTTGATCTCACTATTTTTTCTCT…	Gadus macrocephalus, Gadus ogac, Boreogadus saida	Not mislabeled
UCFMS003-14	SR01-2	University of Calgary	Sept 17 2014	2014	T&T Supermarket	Grocery	OceanMama Seafoods Conger Eel		CCTTTATTTAGTATTTGGTGCTTGAGCCGGCATAGTAGGAACCGCTTTAAGTCTGCTAATTCGAGCTGAATTAAGTCAACCTGGAGCTCTCCTTGGAGATGACCAGATCTATAATGTTATCGTAACAGCACATGCCTTTGTAATAATTTTCTTTATAGTAATACCAGTTATAATTGGTGGATTCGGCAATTGACTTGTGCCACTAATAATTGGGGCCCCAGACATGGCATTCCCTCGAATAAACAACATAAGCTTCTGATTATTACCACCATCATTTCTTTTATTATTAACCTCATCTGGAGTTGAAGCAGGGGCCGGAACAGGATGAACTGTTTATCCCCCACTATCAGGGAACCTGGCCCATGCTGGGGCATCAGTGGACCTAACAATCTTTTCTCT…	Conger myriaster	Not mislabeled
UCFMS008-14	SR05	University of Calgary	Sept 23 2014	2014	Real Canadian Superstore	Grocery	Fresh Halibut Fillet		CCTCTATCTCGTATTTGGTGCCTGAGCCGGAATAGTGGGGACAGGCCTAAGTCTGCTTATTCGGGCAGAACTAAGCCAACCCGGGGCTCTCCTGGGAGACGACCAAATTTATAATGTAATCGTCACCGCACACGCCTTTGTAATAATCTTTTTTATAGTAATACCCATTATGATTGGGGGGTTCGGAAACTGGCTTATTCCACTAATAATTGGGGCCCCAGATATGGCGTTCCCTCGAATGAATAATATGAGTTTCTGACTTCTTCCCCCCTCCTTTCTCCTCCTCTTAGCCTCTTCAGGTGTTGAAGCCGGAGCAGGTACCGGATGAACCGTATACCCCCCACTAGCTGGCAATTTAGCCCACGCCGGAGCATCCGTAGACCTGACAATCTTCTCACT…	Hippoglossus stenolepis, Hippoglossus hippoglossus	Not mislabeled
UCFMS007-14	SR04	University of Calgary	Sept 19 2014	2014	Real Canadian Superstore	Grocery	Fresh Pacific Cod Fillet	$15.99/kg	CCTTTATCTCGTATTTGGTGCCTGAGCCGGCATAGTCGGAACAGCCCTAAGCCTACTCATTCGAGCAGAGCTAAGTCAACCTGGTGCACTCCTAGGTGATGATCAAATTTATAATGTGATCGTTACAGCGCACGCTTTCGTAATAATTTTCTTTATAGTAATACCACTAATAATTGGAGGCTTTGGGAACTGACTCATTCCTCTAATGATCGGTGCCCCCGATATAGCTTTCCCTCGAATAAATAACATAAGCTTCTGACTTCTCCCTCCATCTTTCCTGCTCCTTTTAGCATCCTCTGGTGTAGAAGCTGGAGCTGGAACAGGCTGAACTGTCTACCCACCTTTAGCCGGAAACCTCGCTCATGCTGGGGCATCTGTTGATCTCACTATTTTTTCTCT…	Gadus macrocephalus, Gadus ogac, Boreogadus saida	Not mislabeled
UCFMS017-14	SR16UC	University of Calgary	Sept 20 2014	2014	Kinjo Sushi and Grill	Sushi	Red Snapper		CCTCTATCTAGTATTTGGTGCTTGAGCCGGAATAGTAGGAACTGCACTAAGCCTCCTAATTCGGGCAGAACTAAGCCAGCCCGGCTCTCTTCTCGGAGACGACCAAATCTATAATGTAATTGTTACAGCACATGCTTTCGTAATAATTTTCTTTATAGTAATACCAATTATGATTGGAGGCTTTGGAAACTGACTAGTACCCCTCATGATTGGTGCACCAGACATGGCCTTCCCTCGAATAAATAACATGAGCTTTTGACTTCTCCCCCCCTCATTTCTTCTTCTTCTCGCCTCATCTGGAGTCGAAGCAGGTGCCGGCACAGGATGGACTGTTTATCCCCCGCTCGCAGGCAATCTTGCCCACGCTGGACCTTCTGTTGACTTAACCATCTTCTCCCT…	Oreochromis sp., O. niloticus, O. aureus, O. aureus x niloticus, O. mossambicus, 14 O. sp.	Product substitution
UCFMS001-14	SR 15	University of Calgary	Sept 18 2014	2014	Umi Sushi	Sushi	Salmon Nigiri		CCTNTATTTAGTATTTGGTGCCTGAGCCGGGATAGTAGGCACCGCCCTGAGTCTACTGATTCGGGCGGAACTAAGCCAGCCGGGCGCTCTTCTGGGGGATGACCAAATCTATAACGTGATCGTCACAGCCCATGCCTTCGTTATGATTTTCTTTATAGTCATGCCAATTATAATCGGGGGCTTTGGAAACTGATTAATTCCCCTAATAATCGGAGCCCCTGATATGGCATTTCCTCGAATAAATAACATAAGCTTCTGACTCCTTCCTCCATCCTTTCTCCTCCTCCTGTCTTCATCAGGAGTTGAAGCCGGCGCGGGTACTGGATGAACAGTATACCCCCCTCTAGCCGGCAACCTCGCCCACGCAGGAGCCTCTGTTGATTTAACTATCTTCTCCCT…	Oncorhynchus mykiss, sp.	Product substitution
UCFMS006-14	SR07	University of Calgary	Sept 18 2014	2014	Bento	Sushi	Salmon		CCTCTATTTAGTATTTGGTGCCTGAGCCGGGATAGTAGGCACCGCCCTGAGTCTACTGATTCGGGCGGAACTAAGCCAGCCGGGCGCTCTTCTGGGGGATGACCAAATCTATAACGTGATCGTCACAGCCCATGCCTTCGTTATGATTTTCTTTATAGTCATGCCAATTATAATCGGGGGCTTTGGAAACTGATTAATTCCCCTAATAATCGGAGCCCCTGATATGGCATTTCCTCGAATAAATAACATAAGCTTCTGACTCCTTCCTCCATCCTTTCTCCTCCTCCTGTCTTCATCAGGAGTTGAAGCCGGCGCGGGTACTGGATGAACAGTATACCCCCCTCTAGCCGGCAACCTCGCCCACGCAGGAGCCTCTGTTGATTTAACTATCTTCTCCCT…	Oncorhynchus mykiss, sp.	Product substitution
UCFMS010-14	SR14UC	University of Calgary	Sept 24 2014	2014	Umi Sushi	Sushi	Salmon Nigiri		TTTNGTATTTGGTGCCTGAGCCGGGANAGTAGGCACCGCCCTGAGTCTACTGATTCGGGCGGAACTAAGCCAGCCGGGCGCTCTTCTGGGGGATGACCAAATCTATAACGTGATCGTCACAGCCCATGCCTTCGTTATGATTTTCTTTATAGTCATGCCAATTATAATCGGGGGCTTTGGAAACTGATTAATTCCCCTAATAATCGGAGCCCCTGATATGGCATTTCCTCGAATAAATAACATAAGCTTCTGACTCCTTCCTCCATCCTTTCTCCTCCTCCTGTCTTCATCAGGAGTTGAAGCCGGCGCGGGTACTGGATGAACAGTATACCCCCCTCTAGCCGGCAACCTCGCCCACGCAGGAGCCTCTGTTGATTTAACTATCTTCTCCCTTCATTT…	Oncorhynchus mykiss, sp.	Product substitution
UCFMS019-14	SR18UC	University of Calgary	Sept 30 2014	2014	Umi Sushi	Sushi	Salmon		CCTCTATTTAGTATTTGGTGCCTGAGCCGGGATAGTAGGCACCGCCCTGAGTCTACTGATTCGGGCGGAACTAAGCCAGCCGGGCGCTCTTCTGGGGGATGACCAAATCTATAACGTGATCGTCACAGCCCATGCCTTCGTTATGATTTTCTTTATAGTCATGCCAATTATAATCGGGGGCTTTGGAAACTGATTAATTCCCCTAATAATCGGAGCCCCTGATATGGCATTTCCTCGAATAAATAACATAAGCTTCTGACTCCTTCCTCCATCCTTTCTCCTCCTCCTGTCTTCATCAGGAGTTGAAGCCGGCGCGGGTACTGGATGAACAGTATACCCCCCTCTAGCCGGCAACCTCGCCCACGCAGGAGCCTCTGTTGATTTAACTATCTTCTCCCT…	Oncorhynchus mykiss, sp.	Product substitution
UCFMS016-14	SR03UC	University of Calgary	Sept 23 2014	2014	Haru Sushi	Sushi	Salmon Nigiri; orally told farmed		CCTCTATTTAGTATTTGGTGCCTGAGCCGGAATAGTCGGCACCGCCCTAAGTCTCTTGATTCGAGCAGAACTCAGCCAGCCTGGCGCCCTTCTGGGAGATGACCAAATTTATAACGTAATTGTTACAGCCCATGCCTTCGTCATAATTTTCTTTATAGTCATACCGATTATGATCGGCGGCTTTGGAAACTGATTAATTCCTCTTATAATCGGGGCCCCCGACATAGCATTCCCCCGAATGAATAACATAAGTTTTTGACTTCTCCCTCCCTCCTTTCTTCTCCTCCTGGCCTCATCTGGAGTTGAAGCCGGCGCTGGCACCGGATGAACAGTCTACCCCCCTCTAGCAGGTAATCTTGCCCACGCAGGAGCTTCCGTTGACTTAACTATTTTTTCCCT…	Salmo salar	Not mislabeled
UCFMS002-14	SR01	University of Calgary	Sept 17 2014	2014	T&T Supermarket	Grocery	Lambatt Short Mackerel (Rastrelliger brachysoma)		CCTCTACCTAGTATTCGGTGCATGAGCTGGAATAGTCGGCACGGCCTTAAGCCTGCTTATCCGAGCTGAACTAAGCCAACCAGGGTCCCTCTTAGGCGACGACCAAATCTACAATGTAATCGTTACGGCCCATGCCTTTGTAATGATTTTCTTTATAGTAATGCCAATCATGATTGGAGGGTTTGGAAACTGACTTATCCCCCTAATGATTGGGGCGCCAGATATGGCGTTCCCTCGAATGAACAACATAAGCTTCTGACTCCTTCCCCCCTCTTTCCTTCTGCTTCTTGCCTCATCTGGAGTTGAAGCAGGGGCCGGCACTGGTTGAACAGTCTATCCTCCTCTGGCCAGCAACTTAGCCCATGCCGGAGCGTCTGTCGATCTTACCATCTTCTCCCT…	Rastrelliger kanagurta, R. brachysoma, and R. faughni	Not mislabeled
UCFMS014-14	SR11UC	University of Calgary	Sept 24 2014	2014	Costco	Grocery	Kirkland Signature Wild Sockeye Salmon Fillet		CCTCTATTTAGTATTTGGTGCCTGAGCCGGGATAGTCGGCACCGCCCTAAGCCTACTGATTCGGGCAGAACTAAGCCAGCCAGGCGCTCTTCTAGGAGATGACCAGATCTATAACGTAATCGTCACAGCCCATGCCTTCGTTATGATTTTCTTTATAGTCATACCAATTATAATCGGAGGATTTGGAAACTGATTAATCCCCCTAATAATCGGAGCCCCCGATATGGCATTCCCACGAATAAATAACATAAGCTTCTGACTCCTCCCCCCCTCGTTTCTCCTCCTCCTATCTTCATCTGGAGTTGAAGCCGGCGCTGGTACCGGATGAACAGTTTATCCCCCTCTGGCCGGAAACCTTGCCCACGCGGGAGCCTCTGTTGACTTAACCATCTTCTCCCT…	Oncorhynchus nerka	Not mislabeled
UCFMS009-14	SR13UC	University of Calgary	Sept 24 2014	2014	Umi Sushi	Sushi	Spicy Tuna		CCTCTATCTAGTATTCGGTGCATGAGCTGGAATAGTTGGCACGGCCTTAAGCTTGCTCATCCGAGCTGAACTAAGCCAACCAGGTGCCCTTCTTGGGGACGACCAGATCTACAATGTAATCGTTACGGCCCATGCCTTCGTAATGATTTTCTTTATAGTAATACCAATTATGATTGGAGGATTTGGAAACTGACTTATTCCTCTAATGATCGGAGCCCCCGACATGGCATTCCCACGAATGAACAACATGAGCTTCTGACTCCTTCCTCCCTCTTTCCTTCTGCTCCTAGCTTCTTCAGGAGTTGAGGCTGGGGCCGGAACCGGTTGAACAGTCTACCCTCCCCTTGCCGGCAACCTAGCCCACGCAGGGGCATCAGTTGACCTAACTATTTTCTCACT…	Thunnus alalunga, T. obesus, T. orientalis, T. thynnus	Not mislabeled
UCFMS013-14	SR08UC	University of Calgary	Sept 26 2014	2014	Sushi BBQ Inn	Sushi	Tuna Sashimi		CCTCTATCTAGTATTCGGTGCATGAGCTGGAATAGTTGGCACGGCCTTAAGCTTGCTCATCCGAGCTGAACTAAGCCAACCAGGTGCCCTTCTTGGGGACGACCAGATCTACAATGTAATCGTTACGGCCCATGCCTTCGTAATGATTTTCTTTATAGTAATACCAATTATGATTGGAGGATTTGGAAACTGACTTATTCCTCTAATGATCGGAGCCCCCGACATGGCATTCCCACGAATGAACAACATGAGCTTCTGACTCCTTCCTCCCTCTTTCCTTCTGCTCCTAGCTTCTTCAGGAGTTGAGGCTGGGGCCGGAACCGGTTGAACAGTCTACCCTCCCCTTGCCGGCAACCTAGCCCACGCAGGGGCATCAGTTGACCTAACTATTTTCTCACT…	Thunnus alalunga, T. obesus, T. orientalis, T. thynnus	Not mislabeled
MOBIL1903-16	BOLD-0DLPC9KT4	University of Calgary	Sept 27 2016	2016	McDonald's	Restaurant	Filet-O-Fish (from website - Alaska Pollock)	7.59	CCAGTTCTCAACCAACCAGAAGGAGATGGGCACCCTTTATCTCGTATTTGGTGCCTGAGCCGGCATAGTCGGAACAGCCCTAAGCCTGCTCATTCGAGCAGAGCTAAGTCAACCTGGTGCACTTCTTGGTGATGATCAAATTTATAATGTGATCGTTACAGCGCACGCTTTCGTAATAATTTTCTTTATAGTAATACCACTAATAATTGGAGGCTTTGGAAACTGACTCATTCCTCTAATGATCGGTGCCCCAGATATAGCTTTCCCTCGAATAAATAACATAAGCTTCTGACTTCTTCCCCCATCTTTCCTGCTCCTTTTAGCATCCTCTGGTGTAGAAGCTGGGGCTGGAACAGGCTGAACTGTCTATCCACCTTTAGCCGGAAACCTCGCTCATGC…	Gadus chalcogrammus	Not mislabeled
MOBIL1915-16	BOLD-0DLAS36C3	University of Calgary	Sept 27 2016	2016	Safeway	Grocery	Bluewater Battered Alaska Pollock	4.99/700 g	GCACCCTTTATCTCGTATTTGGTGCCTGAGCCGGCATAGTCGGAACAGCCCTAAGCCTGCTCATTCGAGCAGAGCTAAGTCAACCTGGTGCACTTCTTGGTGATGATCAAATTTATAATGTGATCGTTACAGCGCACGCTTTCGTAATAATTTTCTTTATAGTAATACCACTAATAATTGGAGGCTTTGGAAACTGACTCATTCCTCTAATGATCGGTGCCCCAGATATAGCTTTCCCTCGAATAAATAACATAAGCTTCTGACTTCTTCCCCCATCTTTCCTGCTCCTTTTAGCATCCTCTGGTGTAGAAGCTGGGGCTGGAACAGGCTGAACTGTCTATCCACCTTTAGCCGGAAACCTCGCTCATGCTGGGGCATCTGTTGATCTCACTATTTTCT…	Gadus chalcogrammus	Not mislabeled
MOBIL1898-16	BOLD-0DLCR1357	University of Calgary	Sept 24 2016	2016	Pelican Pier Seafood and Fish Market	Market	Fresh Atlantic Cod	13.97	CCAGTTCTCAACCAACCAGAAGGAGATGGGCACCCTTTATCTCGTATTTGGTGCCTGAGCCGGCATAGTCGGAACAGCCCTAAGCCTACTCATTCGAGCAGAGCTAAGTCAACCTGGTGCACTCCTAGGTGATGATCAAATTTATAATGTGATCGTTACAGCGCACGCTTTCGTAATAATTTTCTTTATAGTAATACCACTAATAATTGGAGGCTTTGGGAACTGACTCATTCCTCTAATGATCGGTGCCCCCGATATAGCTTTCCCTCGAATAAATAACATAAGCTTCTGACTTCTCCCTCCATCTTTCCTGCTCCTTTTAGCATCCTCTGGTGTAGAAGCTGGAGCTGGAACAGGCTGAACTGTCTACCCACCTTTAGCCGGAAACCTCGCTCATGC…	Gadus macrocephalus, Boreogadus saida, Gadus ogac	Product substitution
MOBIL1885-16	BOLD-0DLGK1EF0	University of Calgary	Oct 2 2016	2016	Safeway	Grocery	Fresh Atlantic Salmon	7.94	TTTGGAAAAATGATTAATTCCTCTTATAATCGGGGCCCCCGACATAGCATTCCCCCGAATGAATAACATAAGTTTTTGACTTNTCCCTCCCTCCTTTNTTCTCCTCCTGGCCTCATNTGGAGTTGAAGCCGGCGCTGGCACCGGATGAACAGTGTACCCCCCTGTAGCAGGTAATCTTGCCCACGCAGGAGCTTCCGTTGAGTTAACTATTTTTTCCCTCCATTTGGCTGGTATTTCTTCAATTCTTGGGGCCATTAATTTTATTACAACCATTATTAATATAAAACCCCCAGNTATCTCTCAGTATCAAACCCCACTTTTTGTTTGAGCTGTATTAGTCACTGCCGTCCTTATGTTACTCTCCCTCCCTGTTCTAGCAGCAGGCATTACCATACTACT…	Salmo salar	Not mislabeled
MOBIL1899-16	BOLD-0DLFE5M90	University of Calgary	Sept 24 2016	2016	Pelican Pier Seafood and Fish Market	Market	Atlantic Salmon	21.99	CCAGTTCTCAACCAACCAGAAGGAGATGGGCACCCTCTATTTAGTATTTGGTGCCTGAGCCGGAATAGTCGGCACCGCCCTAAGTCTCTTGATTCGAGCAGAACTCAGCCAGCCTGGCGCCCTTCTGGGAGATGACCAAATTTATAACGTAATTGTTACAGCCCATGCCTTCGTCATAATTTTCTTTATAGTCATACCGATTATGATCGGCGGCTTTGGAAACTGATTAATTCCTCTTATAATCGGGGCCCCCGACATAGCATTCCCCCGAATGAATAACATAAGTTTTTGACTTCTCCCTCCCTCCTTTCTTCTCCTCCTGGCCTCATCTGGAGTTGAAGCCGGCGCTGGCACCGGATGAACAGTCTACCCCCCTCTAGCAGGTAATCTTGCCCACGC…	Salmo salar	Not mislabeled
MOBIL1905-16	BOLD-0DLK2ZTP9	University of Calgary	Sept 25 2016	2016	Tipperary's	Restaurant	Basa	13.13	GCACCCTCTACCTAGTATTTGGTGCCTGAGCAGGAATAGTTGGTACGGCCCTCAGCCTCCTAATTCGGGCAGAGCTAGCCCAACCCGGCGCCCTTCTAGGCGACGACCAAATTTATAATGTTATTGTCACTGCCCATGCCTTCGTAATAATTTTCTTTATAGTAATACCAATTATAATTGGAGGCTTTGGAAACTGACTTGTCCCCTTAATAATTGGAGCGCCTGATATGGCATTCCCTCGAATAAATAATATGAGTTTTTGATTACTTCCGCCTTCCTTCCTACTATTGCTTGCCTCCTCTGGAGTAGAAGCAGGGGCAGGAACAGGATGAACTGTATATCCACCCCTTGCTGGAAACCTCGCACATGCCGGGGCTTCTGTAGATTTAACTATTTTCT…	Pangasianodon hypophthalmus, Pangasius krempfi, P. bocourti	Not mislabeled
MOBIL1889-16	BOLD-0DLR7Z4G1	University of Calgary	Sept 25 2016	2016	Safeway	Grocery	Cod Fillets	27.90/kg	TCAACCAACCACAAGGANATTGGCACCCTTTATCTCGTATTTGGTGCCTGAGCCGGCATAGTCGGAACAGCCCTAAGCCTACTCATTCGAGCAGAGCTAAGTCAACCTGGTGCACTCCTAGGTGATGATCAAATTTATAATGTGATCGTTACAGCGCACGCTTTCGTAATAATTTTCTTTATAGTAATACCACTAATAATTGGAGGCTTTGGGAACTGACTCATTCCTCTAATGATCGGTGCCCCCGATATAGCTTTCCCTCGAATAAATAACATAAGCTTCTGACTTCTCCCTCCATCTTTCCTGCTCCTTTTAGCATCCTCTGGTGTAGAAGCTGGAGCTGGAACAGGCTGAACTGTCTACCCACCTTTAGCCGGAAACCTCGCTCATGCTGGGGCA…	Gadus macrocephalus, Gadus ogac, Boreogadus saida	Not mislabeled
MOBIL1892-16	BOLD-0DLQYG8C6	University of Calgary	Sept 25 2016	2016	Real Canadian Superstore	Grocery	Fresh Boneless Cod Fillets	26.90/kg	GGCACCCTTTATCTCGTATTTGGTGCCTGAGCCGGCATAGTCGGAACAGCCCTAAGCCTACTCATTCGAGCAGAGCTAAGTCAACCTGGTGCACTCCTAGGTGATGATCAAATTTATAATGTGATCGTTACAGCGCACGCTTTCGTAATAATTTTCTTTATAGTAATACCACTAATAATTGGAGGCTTTGGGAACTGACTCATTCCTCTAATGATCGGTGCCCCCGATATAGCTTTCCCTCGAATAAATAACATAAGCTTCTGACTTCTCCCTCCATCTTTCCTGCTCCTTTTAGCATCCTCTGGTGTAGAAGCTGGGGCTGGAACAGGCTGAACTGTCTACCCACCTTTAGCCGGAAACCTCGCTCATGCTGGGGCATCTGTTGATCTCACTATTTTT…	Gadus macrocephalus, Gadus ogac, Boreogadus saida	Not mislabeled
MOBIL1906-16	BOLD-0DLMHZVO3	University of Calgary	Sept 26 2016	2016	Halibut House	Restaurant	Cod	8.45	CCAGTTCTCAACCAACCAGAAGGAGATGGGCACCCTTTATCTCGTATTTGGTGCATGAGCCGGCATAGTCGGAACAGCCCTAAGCCTGCTCATTCGAGCAGAGCTAAGTCAACCTGGTGCACTTCTTGGTGATGATCAAATTTATAATGTGATCGTTACAGCGCACGCTTTCGTAATAATTTTCTTTATAGTAATACCACTAATAATTGGAGGCTTTGGGAACTGACTCATTCCTNTAATGATCGGTGCACCAGATATAGCTTTCCCTCGAATAAATAACATAAGCTTCTGACTTCTTCCTCCATCTTTCCTGCTCCTTTTAGCATCCTCTGGTGTAGAAGCTGGGGCTGGAACAGGCTGAACTGTCTATCCACCTTTAGCCGGAAACCTCGCTCATGC…	Gadus morhua	Not mislabeled
MOBIL1904-16	BOLD-0DLIX49P6	University of Calgary	Sept 25 2016	2016	Jamesons	Restaurant	Haddock	16.8	CCAGTTCTCAACCAACCAGAAGGAGATGGGCACCCTTTATCTCGTATTTGGTGCCTGAGCCGGCATAGTCGGAACAGCCTTAAGCCTGCTCATTCGAGCAGAGCTAAGTCAACCTGGTGCACTTCTAGGTGATGATCAAATTTATAATGTGATTGTCACAGCACACGCTTTCGTAATAATTTTCTTTATAGTAATACCACTAATAATTGGAGGCTTCGGAAACTGACTCATTCCTCTAATGATTGGTGCCCCAGATATGGCTTTCCCTCGAATAAACAACATAAGTTTCTGACTTCTTCCTCCATCTTTTCTGCTTCTTTTAGCATCATCTGGAGTAGAAGCTGGAGCTGGCACAGGTTGAACTGTTTATCCCCCTTTAGCTGGAAACCTCGCTCATGC…	Melanogrammus aeglefinus	Not mislabeled
MOBIL1900-16	BOLD-0DLCZQ565	University of Calgary	Sept 24 2016	2016	Pelican Pier Seafood and Fish Market	Market	Halibut	23.99	CCAGTTCTCAACCAACCAGAAGGAGATGGGCACCCTCTATCTCGTATTTGGTGCCTGAGCCGGAATAGTGGGGACAGGCCTAAGTCTGCTTATTCGGGCAGAACTAAGCCAACCCGGGGCTCTCCTGGGAGACGACCAAATTTATAATGTAATCGTCACCGCACACGCCTTTGTAATAATCTTTTTTATAGTAATACCCATTATGATTGGGGGGTTCGGAAACTGGCTTATTCCACTAATAATTGGGGCCCCAGATATGGCGTTCCCTCGAATGAATAATATGAGTTTCTGACTTCTTCCCCCCTCCTTTCTCCTCCTCTTAGCCTCTTCAGGTGTTGAAGCCGGAGCAGGTACCGGATGAACCGTATACCCCCCACTAGCTGGCAATTTAGCCCACGC…	Hippoglossus stenolepis, H. hippoglossus	Not mislabeled
MOBIL1907-16	BOLD-0DLJ3S4Z5	University of Calgary	Sept 25 2016	2016	Halibut House	Restaurant	Halibut	9.45	GCACCCTCTATCTCGTATTTGGTGCCTGAGCCGGAATAGTGGGGACAGGCCTAAGTCTGCTTATTCGGGCAGAACTAAGCCAACCCGGGGCTCTCCTGGGAGACGACCAAATTTATAATGTAATCGTCACCGCACACGCCTTTGTAATAATCTTTTTTATAGTAATACCCATTATGATTGGGGGGTTCGGAAACTGGCTTATTCCACTAATAATTGGGGCCCCAGATATGGCGTTCCCTCGAATGAATAATATGAGTTTCTGACTTCTTCCCCCCTCCTTTCTCCTCCTCTTAGCCTCTTCAGGTGTTGAAGCCGGAGCAGGTACCGGATGAACCGTATACCCCCCACTAGCTGGCAATTTAGCCCACGCCGGAGCATCCGTAGACCTGACAATCTTCT…	Hippoglossus stenolepis, H. hippoglossus	Not mislabeled
MOBIL1891-16	BOLD-0DLR9O585	University of Calgary	Sept 27 2016	2016	Costco	Grocery	Wild Pacific Cod Fillets	17.99/kg	CACCCTTTATCTCGTATTTGGTGCCTGAGCCGGCATAGTCGGAACAGCCCTAAGCCTACTCATTCGAGCAGAGCTAAGTCAACCTGGTGCACTCCTAGGTGATGATCAAATTTATAATGTGATCGTTACAGCGCACGCTTTCGTAATAATTTTCTTTATAGTAATACCACTAATAATTGGAGGCTTTGGGAACTGACTCATTCCTCTAATGATCGGTGCCCCCGATATAGCTTTCCCTCGAATAAATAACATAAGCTTCTGACTTCTCCCTCCATCTTTCCTGCTCCTTTTAGCATCCTCTGGTGTAGAAGCTGGAGCTGGAACAGGCTGAACTGTCTACCCACCTTTAGCCGGAAACCTCGCTCATGCTGGGGCATCTGTTGATCTCACTATTTTTTC…	Gadus macrocephalus, Gadus ogac, Boreogadus saida	Not mislabeled
MOBIL1896-16	BOLD-0DLNVK2F5	University of Calgary	Oct 3 2016	2016	Real Canadian Superstore	Grocery	Wild Pacific Herring	3.90/kg	ACCCGCAATCTCACAATACCAAACACCTCTGTTTGTCTGATCCGTTCTTGTTACAGCTGTTCTGCTTCTTCTATCGCTGCCTGTACTAGCTGCCGGAATTACAATGCTTCTTACAGATCGAAACCTAAACACCACCTTCTTCGACCCAGCAGGAGGNGGAGACCCAATTCT	Clupea pallasii, C. harengus	Not mislabeled
MOBIL1911-16	BOLD-0DLRJP9H7	University of Calgary	Sept 26 2016	2016	Real Canadian Superstore	Grocery	Wild Pacific Sole	20/2 kg	CCAGTTCTCAACCAACCAGAAGGAGATGGGCACCCTCTATCTCGTATTTGGTGCCTGAGCCGGAATAGTGGGGACAGGTCTAAGTCTGCTCATTCGGGCAGAACTCAGCCAACCTGGGGCTCTCCTGGGAGACGATCAAATTTATAACGTGATCGTTACCGCACACGCCTTTGTAATAATCTTCTTTATAGTAATACCAATTATGATCGGAGGGTTCGGAAACTGACTTATCCCACTAATGATCGGGGCCCCTGATATGGCATTCCCTCGAATGAACAACATGAGTTTCTGACTTCTGCCTCCATCCTTTCTTCTCCTCCTAGCCTCTTCAGGCGTAGAAGCCGGGGCTGGAACTGGGTGAACTGTATATCCTCCGTTAGCTGGAAATCTAGCACACGC…	Limanda aspera, L. limanda	Semantic mislabeling
MOBIL1691-16	BOLD-0DLI71RP0	University of Calgary	Oct 27 2016	2016	Calgary Co-op Food Store	Grocery	All Natural Pollock Fillets	3.99/400 g	CACCCTCTATCTCGTATTTGGTGCCTGAGCCGGAATAGTGGGGACAGGTCTAAGTCTGCTCATTCGGGCAGAACTCAGCCAACCTGGGGCTCTCCTGGGAGACGATCAAATTTATAACGTGATCGTTACCGCACACGCCTTTGTAATAATCTTCTTTATAGTAATACCAATTATGATCGGAGGGTTCGGAAACTGACTTATCCCACTAATGATCGGGGCCCCTGATATGGCGTTCCCTCGAATGAACAACATGAGTTTCTGACTTCTGCCTCCATCCTTTCTTCTCCTCCTAGCCTCTTCAGGCGTAGAAGCCGGGGCTGGGACTGGGTGAACTGTGTATCCTCCGTTAGCTGGAAATCTAGCACACGCTGGAGCATCCGTAGACCTAACAATCTTTTC…	Limanda aspera	Product substitution
MOBIL1913-16	BOLD-0DLSBEC99	University of Calgary	Sept 30 2016	2016	Kinjo	Sushi	Okinawa Roll (Seaweed, red tuna, mayo, crab meat, avocado, cucumber, mango)	8.25	CCAGTTCTCAACCAACCAGAAGGAGATGGGCACCCTTTATCTAGTATTCGGTGCATGAGCTGGAATAGTTGGCACGGCCTTAAGCTTGCTCATCCGAGCTGAACTAAGCCAACCAGGTGCCCTTCTTGGGGACGACCAGATCTACAATGTAATCGTTACGGCCCATGCCTTCGTAATGATTTTCTTTATAGTAATACCAATTATGATTGGAGGATTTGGAAACTGACTTATTCCTCTAATGATCGGAGCCCCCGACATGGCATTCCCACGAATGAACAACATGAGCTTCTGACTCCTTCCCCCCTCTTTCCTTCTGCTCCTAGCTTCTTCAGGAGTTGAGGCTGGAGCCGGAACCGGTTGAACAGTCTACCCTCCCCTTGCCGGCAACCTGGCCCACGC…	Thunnus albacares	Semantic mislabeling
MOBIL1909-16	BOLD-0DLFYNI32	University of Calgary	Sept 29 2016	2016	Safeway	Grocery	Fresh Snapper	14.9/kg	GCACCCTTTATCTAGTATTTGGTGCCTGAGCCGGTATAGTAGGCACAGCCCTCAGCCTACTCATTCGAGCAGAACTAAGCCAACCGGGCGCTCTCCTTGGAGACGACCAAATTTATAATGTAATCGTTACAGCACATGCCTTCGTAATGATTTTCTTTATAGTAATGCCAATTATAATTGGAGGTTTTGGAAACTGATTAATTCCCCTAATGATTGGAGCCCCAGATATAGCATTTCCTCGTATAAATAATATAAGTTTCTGACTTCTACCCCCTTCTTTCCTTCTACTACTTGCCTCTTCTGGGGTAGAAGCTGGTGCCGGAACCGGATGAACAGTGTACCCGCCCCTGTCCGGTAATTTAGCCCACGCAGGAGCATCAGTCGATCTGACAATTTTTT…	Sebastes serranoides, S. flavidus, S. sp., S. melanops, S. variabilis	Product substitution
MOBIL1897-16	BOLD-0DLEI53J6	University of Calgary	Sept 24 2016	2016	Pelican Pier Seafood and Fish Market	Market	Wild Sockeye Salmon	16.99	GCACCCTCTATTTAGTATTTGGTGCCTGAGCCGGGATAGTCGGCACCGCCCTAAGCCTACTGATTCGGGCAGAACTAAGCCAGCCAGGCGCTCTTCTAGGAGATGACCAGATCTATAACGTAATCGTCACAGCCCATGCCTTCGTTATGATTTTCTTTATAGTCATACCAATTATAATCGGAGGATTTGGAAACTGATTAATCCCCCTAATAATCGGAGCCCCCGATATGGCATTCCCACGAATAAATAACATAAGCTTCTGACTCCTCCCCCCCTCGTTTCTCCTCCTCCTATCTTCATCTGGAGTTGAAGCCGGCGCTGGTACCGGATGAACAGTTTATCCCCCTCTGGCCGGAAACCTTGCCCACGCGGGAGCCTCTGTTGACTTAACCATCTTCT…	Oncorhynchus nerka	Not mislabeled
MOBIL1910-16	BOLD-0DLFR3NY0	University of Calgary	Sept 24 2016	2016	Loblaws City Market	Grocery	Fresh Sole Fillet, Boneless	17.61/kg	GACAGCAGTCACTATGTACCAAATCCCACTATTTGTTTGAGCCGTACTCATTACTGCCGTCCTTCTCCTCCTTTCCCTGCCCGTCTTAGCCGCTGGCATTACAATGCTACTCACAGACCGCAACCTAAACACAACCTTCTTTGACCCTGCCGGAGGAGGTGACCCCATCTTAACCCAAC	Parophrys vetulus	Not mislabeled
MOBIL1916-16	BOLD-0DLSGBC18	University of Calgary	Sept 23 2016	2016	Bento Sushi	Sushi	Steelhead Salmon Avocado Roll	8/200 g	CCAGTTCTCAACCAACCAGAAGGAGATGGGCACCCTCTATTTAGTATTTGGTGCCTGAGCCGGGATAGTAGGCACCGCCCTGAGTGTACTGATTCGGGCGGAACTAAGCCAGCCGGGCGCTCTTCTGGGGGATGACCAAATCTATAACGTGATCGTCACAGCCCATGCCTTCGTTATGATTTTCTTTATAGTCATGCCAATTATAATCGGGGGCTTTGGAAACTGATTAATTCCCCTAATAATCGGAGCCCCTGATATGGCATTCCCTCGAATAAATAACATAAGCTTCTGACTCCTTCCTCCATCCTTTCTCCTCCTCCTGTCTTCATCAGGAGTTGAAGCCGGCGCGGGTACTGGATGAACAGTATACCCCCCTCTAGCCGGCAACCTCGCCCACGC…	Oncorhynchus mykiss, sp.	Not mislabeled
MOBIL1888-16	BOLD-0DLO6WEV5	University of Calgary	Sept 26 2016	2016	Safeway	Grocery	Red Dragon Roll - California Roll topped with Smoked Steelhead Salmon	7.49/9 pc	CCAGTTCTCAACCAACCAGAAGGAGATGGGCACCCTCTATTTAGTATTTGGTGCCTGAGCCGGGATAGTAGGCACCGCCCTGAGTCTACTGATTCGGGCGGAACTAAGCCAGCCGGGCGCTCTTCTGGGGGATGACCAAATCTATAACGTGATCGTCACAGCCCATGCCTTCGTTATGATTTTCTTTATAGTCATGCCAATTATAATCGGGGGCTTTGGAAACTGATTAATTCCCCTAATAATCGGAGCCCCTGATATGGCATTTCCTCGAATAAATAACATAAGCTTCTGACTCCTTCCTCCATCCTTTCTCCTCCTCCTGTCTTCATCAGGAGTTGAAGCCGGCGCGGGTACTGGATGAACAGTATACCCCCCTCTAGCCGGCAACCTCGCCCACGC…	Oncorhynchus mykiss, sp.	Not mislabeled
MOBIL1887-16	BOLD-0DLO7VJI9	University of Calgary	Sept 30 2016	2016	Safeway	Grocery	Red Dragon Roll - California Roll topped with Smoked Steelhead Salmon	7.49/9 pc	TCCAGCCATCTCTCAGTACCAAACCCCCCTTTTCGTTTGAGCCGTGCTAGTTACTGCTGTCCTTCTATTACTTTCCCTCCCCGTCCTGGCAGCAGGCATTACTATGTTACTTACAGACCGAAATCTAAACACCACTTTCTTTGACCCGGCAGGCGGGGGAGATCCAATTTTATACCAACACC	Oncorhynchus mykiss	Not mislabeled
MOBIL1894-16	BOLD-0DLC5ONM1	University of Calgary	Sept 25 2016	2016	Co-op	Grocery	Steelhead Trout	29.90/kg	CCAGTTCTCAACCAACCAGAAGGAGATGGGCACCCTCTATTTAGTATTTGGTGCCTGAGCCGGGATAGTAGGCACCGCCCTGAGTCTACTGATTCGGGCGGAACTAAGCCAGCCGGGCGCTCTTCTGGGGGATGACCAAATCTATAACGTGATCGTCACAGCCCATGCCTTCGTTATGATTTTCTTTATAGTCATGCCAATTATAATCGGGGGCTTTGGAAACTGATTAATTCCCCTAATAATCGGAGCCCCTGATATGGCATTTCCTCGAATAAATAACATAAGCTTCTGACTCCTTCCTCCATCCTTTCTCCTCCTCCTGTCTTCATCAGGAGTTGAAGCCGGCGCGGGTACTGGATGAACAGTATACCCCCCTCTAGCCGGCAACCTCGCCCACGC…	Oncorhynchus mykiss, sp.	Not mislabeled
MOBIL1914-16	BOLD-0DLP6BNG3	University of Calgary	Sept 23 2016	2016	Umi Sushi Express	Sushi	Spicy Tuna	5.99/8 rolls	CCAGTTCTCAACCAACCAGAAGGAGATGGGCACCCTCTATCTAGTATTCGGTGCATGAGCTGGAATAGTTGGCACGGCCTTAAGCTTGCTCATCCGAGCTGAACTAAGCCAACCAGGTGCCCTTCTTGGGGACGACCAGATCTACAATGTAATCGTTACGGCCCATGCCTTCGTAATGATTTTCTTTATAGTAATACCAATTATGATTGGAGGATTTGGAAACTGACTTATTCCTCTAATGATCGGAGCCCCCGACATGGCATTCCCACGAATGAACAACATGAGCTTCTGACTCCTTCCTCCCTCTTTCCTTCTGCTCCTAGCTTCTTCAGGAGTTGAGGCTGGGGCCGGAACCGGTTGAACAGTCTACCCTCCCCTTGCCGGCAACCTAGCCCACGC…	Thunnus alalunga, T. obesus, T. orientalis	Not mislabeled
MOBIL1908-16	BOLD-0DLG5Q6V2	University of Calgary	Sept 27 2016	2016	Co-op	Grocery	Yellowtail Rockfish	19.90/kg	CCCAGCCATCTCTCAATACCAAACACCCCTGTTTGTGTGAGCCGTCCTAATTACCGCTGTTCTTCTCCTTCTCTCTCTACCAGTTCTTGCTGCCGGCATCACAATGCTCCTTACCGACCGAAATCTTAATACCACCTTCTTTGACCCGGCAGGAGGAGGGGACCCAATCCTTTACCAAC	Sebastes alutus, Sebastes sp. OC146	Product substitution
*samples without identifiers were handled through Lifescanner alone and were not imported into BOLD	*samples without identifiers were handled through Lifescanner alone and were not imported into BOLD
